# Supplementary material for: Second-Generation Enamine-Type Schiff Bases as 2-Amino Acid-Derived Antifungals against Fusarium oxysporum: Microwave-Assisted Synthesis, In Vitro Activity, 3D-QSAR, and In Vivo Effect
Source: MDPI journal article supplement (doi:10.3390/jof9010113), 2023-01-13
Supplement: s1 [file s1]

## **Supplementary Material**

### **Research Article**

#### **Second-Generation Enamine-Type Schiff Bases as 2-Amino Acid-Derived Antifungals against *Fusarium Oxysporum*: Microwave-Assisted Synthesis, In-Vitro Activity, 3D-QSAR, and In-Vivo Effect**

**Paola Borrego-Muñoz, Diego Cardenas, Felipe Ospina, Ericsson Coy-Barrera and Diego Quiroga\***

### **Content**

Spectroscopic data for characterization of compounds 1-48 (Pages 1-7)

ATR-FT-IR spectra of selected compounds (Pages 8)

<sup>1</sup>H and <sup>13</sup>C NMR spectra of compounds 1-48 (Pages 9-56)

HR-MS spectra of selected compounds (Pages 57-62)

**Compounds 1-4, 17-20, and 33-36 showed the same properties and spectroscopic characterization than the previously reported by Borrego-Muñoz (2022, DOI: 10.1021/acsomega.2c02614)**

**Methyl (Z)-(4-oxopent-2-en-2-yl)-L-phenylalaninate (5, C<sub>15</sub>H<sub>19</sub>NO<sub>3</sub>)**

<sup>1</sup>H-NMR (400 MHz, CDCl<sub>3</sub>) δ 11.11 (*d*, *J* = 9.5 Hz, 1H); 7.30 (*m*, 5H), 4.97 (*s*, 1H), 4.35 (*m*, 1H), 3.77 (*s*, 3H), 3.34 – 2.94 (*m*, 2H), 2.05 (*s*, 3H), 1.64 (*s*, 3H); <sup>13</sup>C-NMR (100 MHz, CDCl<sub>3</sub>) 196.1, 171.6, 161.4, 136.2, 129.5, 128.8, 127.3, 96.8, 58.2, 52.7, 40.1, 29.2, 18.9; [ $\alpha$ ]<sub>D</sub><sup>25</sup> = -130.0° ± 0.01 (*c* 0.6, MeOH). ESI-HRMS *m/z* [M+H]<sup>+</sup>, 262.1596 (calcd. 262.1443); ATR-FT-IR absorption bands in cm<sup>-1</sup>: 1602 (C=C bond stretching), 1720 (C=O bond stretching), 2800–3430 cm<sup>-1</sup> (N-H bond stretching).

**Ethyl (Z)-(4-oxopent-2-en-2-yl)-L-phenylalaninate (6, C<sub>16</sub>H<sub>21</sub>NO<sub>3</sub>)**

<sup>1</sup>H-NMR (400 MHz, CDCl<sub>3</sub>) δ 11.09 (*d*, *J* = 9.4 Hz, 1H), 7.39 – 7.18 (*m*, 5H), 4.96 (*s*, 1H), 4.32 (*m*, 1H), 4.21 (*m*, 2H), 3.24 – 2.99 (*m*, 2H), 2.04 (*s*, 3H), 1.65 (*s*, 3H), 1.27 (*t*, *J* = 7.2 Hz, 3H), <sup>13</sup>C-NMR (100 MHz, CDCl<sub>3</sub>) δ 195.9, 171.1, 161.3, 136.3, 130.0, 128.7, 127.2, 96.7, 61.7, 58.3, 40.1, 29.1, 18.8, 14.2, [ $\alpha$ ]<sub>D</sub><sup>25</sup> = -96.67° ± 0.01 (*c* 0.6, MeOH). ATR-FT-IR absorption bands in cm<sup>-1</sup>: 1604 (C=C bond stretching), 1712 (C=O bond stretching), 2810–3430 cm<sup>-1</sup> (N-H bond stretching).

**Isopropyl (Z)-(4-oxopent-2-en-2-yl)-L-phenylalaninate (7, C<sub>17</sub>H<sub>23</sub>NO<sub>3</sub>)**

<sup>1</sup>H-NMR (CDCl<sub>3</sub>) δ 11.05 (*d*, *J* = 9.1 Hz, 1H), 7.19 – 7.34 (*m*, 5H), 5.01 (*m*, 1H), 4.94 (*s*, 1H), 4.26 (*m*, 1H), 3.15 (*m*, 1H), 2.99 (*m*, 1H), 1.63 (*s*, 3H), 2.01 (*s*, 3H), 1.21 (*m*, 6H), <sup>13</sup>C NMR (CDCl<sub>3</sub>) δ 196.7, 170.5, 161.3, 136.2, 129.5, 128.6, 127.1, 96.6, 69.3, 58.3, 39.9, 29.0, 21.7, 21.7, 18.8, [ $\alpha$ ]<sub>D</sub><sup>25</sup> = -83.33° ± 0.01 (*c* 0.6, MeOH). ESI-HRMS *m/z* [M+H]<sup>+</sup>, 290.1754 (calcd. 290.1751); ATR-FT-IR absorption bands in cm<sup>-1</sup>: 1603 (C=C bond stretching), 1736 (C=O bond stretching), 2815–3440 cm<sup>-1</sup> (N-H bond stretching).

**Butyl (Z)-(4-oxopent-2-en-2-yl)-L-phenylalaninate (8, C<sub>18</sub>H<sub>25</sub>NO<sub>3</sub>)**

<sup>1</sup>H-NMR (CDCl<sub>3</sub>) δ 10.98 (*d*, *J* = 9.1 Hz, 1H), 7.12 – 7.25 (*m*, 5H), 4.86 (*s*, 1H), 4.04 (*t*, *J* = 6.7 Hz, 2H), 4.22 (*m*, 1H), 3.10 (*m*, 1H), 2.92 (*m*, 1H), 1.55 (*s*, 3H), 1.94 (*s*, 2H), 1.46 – 1.55 (*m*, 2H), 1.25 (*m*, 2H); <sup>13</sup>C NMR (CDCl<sub>3</sub>) δ 195.9, 171.1, 161.3, 136.2, 129.4, 128.7, 127.2, 96.7, 65.5, 58.2, 40.0, 30.5, 29.1, 19.0, 18.8, 13.7, [ $\alpha$ ]<sub>D</sub><sup>25</sup> = -144.17° ± 0.01 (*c* 0.6, MeOH); ESI-HRMS *m/z* [M+H]<sup>+</sup>, 304.2143 (calcd. 304.1913); ATR-FT-IR absorption bands in cm<sup>-1</sup>: 1604 (C=C bond stretching), 1738 (C=O bond stretching), 2810–3420 cm<sup>-1</sup> (N-H bond stretching).

**Methyl (Z)-(4-oxopent-2-en-2-yl)-L-tyrosinate (9, C<sub>15</sub>H<sub>19</sub>NO<sub>4</sub>)**

<sup>1</sup>H-NMR (CDCl<sub>3</sub>) δ 10.99 (*d*, *J* = 9.0 Hz, 1H), 7.05 (*d*, *J* = 8.1 Hz, 2H), 6.77 (*d*, *J* = 8.1 Hz, 2H), 4.98 (*m*, 1H), 4.35 (*m*, 1H), 3.73 (*s*, 3H), 3.14 – 2.92 (*m*, 2H), 2.02 (*s*, 3H), 1.75 (*s*, 3H); <sup>13</sup>C NMR (CDCl<sub>3</sub>) δ 196.3, 171.6, 162.7, 156.3, 130.6, 126.6, 115.9, 97.0, 58.2, 52.8, 38.7, 28.6, 19.2, [ $\alpha$ ]<sub>D</sub><sup>25</sup> = -100.00° ± 0.01 (*c* 0.6, MeOH). ESI-HRMS *m/z* [M+H]<sup>+</sup>, 278.1674 (calcd. 278.1392); ATR-FT-IR absorption bands in cm<sup>-1</sup>: 1604 (C=C bond stretching), 1711 (C=O bond stretching), 2800–3440 cm<sup>-1</sup> (N-H bond stretching).

**Ethyl (Z)-(4-oxopent-2-en-2-yl)-L-tyrosinate (10, C<sub>16</sub>H<sub>21</sub>NO<sub>4</sub>)**

<sup>1</sup>H-NMR (CDCl<sub>3</sub>) δ 11.00 (*d*, *J* = 8.7 Hz, 1H), 7.05 (*d*, *J* = 8.4 Hz, 2H), 6.78 (*d*, *J* = 8.4 Hz, 2H), 4.99 (*s*, 1H), 4.34 (*m*, 1H), 4.18 (*m*, 2H), 3.13 – 2.96 (*m*, 2H), 2.02 (*s*, 3H), 1.78 (*s*, 3H), 1.24 (*t*, *J* = 7.1 Hz, 3H); <sup>13</sup>C NMR (CDCl<sub>3</sub>) δ 196.2, 171.0, 163.0, 156.6, 130.6, 126.2, 115.9, 96.9, 61.9, 58.2, 38.6, 28.5, 19.2, 14.2, [ $\alpha$ ]<sub>D</sub><sup>25</sup> = -

145.83° ± 0.01 (c 0.6, MeOH). ATR-FT-IR absorption bands in cm<sup>-1</sup>: 1604 (C=C bond stretching), 1720 (C=O bond stretching), 2810–3430 cm<sup>-1</sup> (N-H bond stretching).

**Isopropyl (Z)-(4-oxopent-2-en-2-yl)-L-tyrosinate (11, C<sub>17</sub>H<sub>23</sub>NO<sub>4</sub>)**

<sup>1</sup>H-NMR (CDCl<sub>3</sub>) δ 11.06 (*d*, *J* = 8.8 Hz, 1H), 9.47 (*bs*, 1H), 7.05 (*d*, *J* = 8.4 Hz, 2H), 6.81 (*d*, *J* = 8.4 Hz, 2H), 5.02 (*m*, *J* = 6.3 Hz, 1H), 4.98 (*s*, 1H), 4.30 (*m*, 1H), 3.09 (*m*, 1H), 2.95 (*m*, 1H), 2.02 (*s*, 3H), 1.74 (*s*, 3H), 1.21 (*m*, 6H); <sup>13</sup>C NMR (CDCl<sub>3</sub>) δ 195.9, 170.5, 163.1, 156.6, 130.5, 126.1, 115.8, 96.7, 69.6, 58.4, 38.8, 28.3, 21.7, 21.6, 19.1, [α]<sub>D</sub><sup>25</sup> = -223.33° ± 0.01 (c 0.6, MeOH). ESI-HRMS *m/z* [M+H]<sup>+</sup>, 306.1704 (calcd. 306.1700); ATR-FT-IR absorption bands in cm<sup>-1</sup>: 1597 (C=C bond stretching), 1733 (C=O bond stretching), 2810–3450 cm<sup>-1</sup> (N-H bond stretching).

**Butyl (Z)-(4-oxopent-2-en-2-yl)-L-tyrosinate (12, C<sub>18</sub>H<sub>25</sub>NO<sub>4</sub>)**

<sup>1</sup>H-NMR (CDCl<sub>3</sub>) δ 11.01 (*d*, *J* = 8.7 Hz, 1H), 9.30 (*bs*, 1H), 7.05 (*d*, *J* = 8.2 Hz, 2H), 6.80 (*d*, *J* = 8.2 Hz, 2H), 4.99 (*s*, 1H), 4.35 (*m*, 1H), 4.12 (*m*, 2H), 3.10 (*m*, 1H), 2.99 (*m*, 1H), 2.02 (*s*, 3H), 1.77 (*s*, 3H), 1.53 – 1.65 (*m*, 2H), 1.31 (*m*, 2H), 0.89 (*t*, *J* = 7.5 Hz, 3H); <sup>13</sup>C NMR (CDCl<sub>3</sub>) δ 196.0, 171.1, 163.1, 156.7, 130.5, 126.0, 115.8, 96.8, 65.6, 58.3, 38.6, 30.5, 28.3, 19.1, 19.0, 13.7. [α]<sub>D</sub><sup>25</sup> = -183.33° ± 0.01 (c 0.6, MeOH). ESI-HRMS *m/z* [M+H]<sup>+</sup>, 320.1862 (calcd. 320.1856); ATR-FT-IR absorption bands in cm<sup>-1</sup>: 1596 (C=C bond stretching), 1731 (C=O bond stretching), 2810–3440 cm<sup>-1</sup> (N-H bond stretching).

**Methyl (Z)-(4-oxopent-2-en-2-yl)-L-alaninate (13, C<sub>9</sub>H<sub>15</sub>NO<sub>3</sub>)**

<sup>1</sup>H-NMR (CDCl<sub>3</sub>) δ 10.91 – 10.83 (*m*, 1H), 5.00 (*s*, 1H), 4.25 – 4.13 (*m*, 1H), 3.72 (*s*, 3H), 1.99 (*s*, 3H), 1.86 (*s*, 3H), 1.47 (*d*, *J* = 7.1 Hz, 3H); <sup>13</sup>C NMR (CDCl<sub>3</sub>) δ 196.1, 172.8, 161.4, 96.6, 52.7, 51.5, 29.1, 19.2, 18.9, [α]<sub>D</sub><sup>25</sup> = -5.42° ± 0.01 (c 0.6, MeOH).

**Ethyl (Z)-(4-oxopent-2-en-2-yl)-L-alaninate (14, C<sub>10</sub>H<sub>17</sub>NO<sub>3</sub>)**

<sup>1</sup>H-NMR (CDCl<sub>3</sub>) δ 10.88 (*d*, *J* = 7.8 Hz, 1H), 5.01 (*s*, 1H), 4.19 (*q*, *J* = 7.2 Hz, 3H), 2.01 (*s*, 3H), 1.88 (*s*, 3H), 1.48 (*d*, *J* = 7.1 Hz, 3H), 1.26 (*t*, *J* = 7.1 Hz, 3H); <sup>13</sup>C NMR (CDCl<sub>3</sub>) δ 196.0, 172.3, 161.4, 96.6, 61.7, 51.7, 29.1, 19.2, 19.0, 14.2, [α]<sub>D</sub><sup>25</sup> = -4.17° ± 0.01 (c 0.6, MeOH).

**Isopropyl (Z)-(4-oxopent-2-en-2-yl)-L-alaninate (15, C<sub>11</sub>H<sub>19</sub>NO<sub>3</sub>)**

<sup>1</sup>H-NMR (CDCl<sub>3</sub>) δ 10.88 (*d*, *J* = 7.2 Hz, 1H), 5.05 (*m*, 1H), 5.03 (*s*, 1H), 4.16 (*m*, 1H), 2.02 (*s*, 3H), 1.90 (*s*, 3H), 1.48 (*d*, *J* = 7.1 Hz, 3H), 1.26 (*d*, *J* = 6.2 Hz, 6H); <sup>13</sup>C NMR (CDCl<sub>3</sub>) δ 195.8, 171.7, 161.3, 96.4, 69.2, 51.7, 29.0, 21.6, 21.6, 19.0, 18.9. [α]<sub>D</sub><sup>25</sup> = -2.58° ± 0.01 (c 0.6, MeOH).

**Butyl (Z)-(4-oxopent-2-en-2-yl)-L-alaninate (16, C<sub>12</sub>H<sub>21</sub>NO<sub>3</sub>)**

<sup>1</sup>H-NMR (CDCl<sub>3</sub>) δ 10.89 (*d*, *J* = 7.8 Hz, 1H), 5.04 (*s*, 1H), 4.21 (*m*, 1H), 4.15 (*t*, *J* = 6.6 Hz, 2H), 2.02 (*s*, 3H), 1.91 (*s*, 3H), 1.63 (*m*, 2H), 1.50 (*d*, *J* = 7.1 Hz, 3H), 1.38 (*m*, 2H), 0.93 (*t*, *J* = 7.4 Hz, 3H); <sup>13</sup>C NMR (CDCl<sub>3</sub>) δ 195.8, 172.3, 161.3, 96.5, 65.3, 51.6, 30.5, 29.0, 19.1, 19.0, 18.9, 13.6. [α]<sub>D</sub><sup>25</sup> = -2.17° ± 0.01 (c 0.6, MeOH).

**Ethyl (S,Z)-3-((1-methoxy-1-oxo-3-phenylpropan-2-yl)amino)but-2-enoate (21, C<sub>16</sub>H<sub>21</sub>NO<sub>4</sub>)**

<sup>1</sup>H-NMR (CDCl<sub>3</sub>) δ 8.96 (*d*, *J* = 9.7 Hz, 1H), 7.37 – 7.24 (*m*, 5H), 4.50 (*s*, 1H), 4.33 (*m*, 1H), 4.16 (*q*, *J* = 7.1 Hz, 2H), 3.77 (*s*, 3H), 3.21 (*m*, 1H), 3.02 (*m*, 1H), 1.67 (*s*, 3H), 1.30 (*t*, *J* = 7.1 Hz, 3H); <sup>13</sup>C NMR (CDCl<sub>3</sub>) δ 172.1, 170.3, 159.8, 136.5, 129.5, 128.8, 127.2, 85.0, 58.6, 52.5, 40.4, 19.3, 14.7, [α]<sub>D</sub><sup>25</sup> = -195.0° ± 0.01 (c 0.6,

MeOH). ATR-FT-IR absorption bands in  $\text{cm}^{-1}$ : 1601 (C=C bond stretching), 1720 (C=O bond stretching), 2820–3440  $\text{cm}^{-1}$  (N-H bond stretching).

**Ethyl (S,Z)-3-((1-ethoxy-1-oxo-3-phenylpropan-2-yl)amino)but-2-enoate (22,  $\text{C}_{17}\text{H}_{23}\text{NO}_4$ )**

$^1\text{H}$ -NMR ( $\text{CDCl}_3$ )  $\delta$  8.94 (*d*,  $J$  = 9.6 Hz, 1H), 7.38 – 7.22 (*m*, 5H), 4.49 (*m*, 1H), 4.30 (*m*, 1H), 4.18 (*m*, 3H), 3.26 – 2.97 (*m*, 2H), 1.68 (*s*, 3H), 1.28 (*m*, 6H);  $^{13}\text{C}$  NMR ( $\text{CDCl}_3$ )  $\delta$  171.6, 170.3, 159.6, 136.5, 129.5, 128.7, 127.2, 84.9, 61.5, 58.6, 58.1, 40.4, 19.3, 14.7, 14.2,  $[\alpha]_D^{25} = -85.0^\circ \pm 0.01$  (*c* 0.6, MeOH). ATR-FT-IR absorption bands in  $\text{cm}^{-1}$ : 1602 (C=C bond stretching), 1720 (C=O bond stretching), 2810–3450  $\text{cm}^{-1}$  (N-H bond stretching).

**Ethyl (S,Z)-3-((1-isopropoxy-1-oxo-3-phenylpropan-2-yl)amino)but-2-enoate (23,  $\text{C}_{18}\text{H}_{25}\text{NO}_4$ )**

$^1\text{H}$ -NMR ( $\text{CDCl}_3$ )  $\delta$  8.90 (*d*,  $J$  = 9.4 Hz, 1H), 7.18 – 7.33 (*m*, 4H), 5.01 (*q*,  $J$  = 6.3 Hz, 1H), 4.43 (*s*, 1H), 5.00 (*m*,  $J$  = 6.3 Hz, 1H), 4.22 (*m*, 1H), 3.36 – 3.48 (*m*, 1H), 3.12 (*m*, 1H), 2.97 (*m*, 1H), 1.65 (*s*, 3H), 1.23 (*t*,  $J$  = 6.3 Hz, 3H), 1.18 (*m*, 3H);  $^{13}\text{C}$  NMR ( $\text{CDCl}_3$ )  $\delta$  171.1, 170.2, 159.9, 136.4, 129.4, 128.6, 127.0, 84.7, 69.1, 58.5, 58.0, 40.2, 21.6, 19.3, 14.6.  $[\alpha]_D^{25} = -53.25^\circ \pm 0.01$  (*c* 0.6, MeOH). ATR-FT-IR absorption bands in  $\text{cm}^{-1}$ : 1603 (C=C bond stretching), 1721 (C=O bond stretching), 2810–3440  $\text{cm}^{-1}$  (N-H bond stretching).

**Ethyl (S,Z)-3-((1-butoxy-1-oxo-3-phenylpropan-2-yl)amino)but-2-enoate (24,  $\text{C}_{19}\text{H}_{27}\text{NO}_4$ )**

$^1\text{H}$ -NMR ( $\text{CDCl}_3$ )  $\delta$  8.91 (*m*,  $J$  = 9.6 Hz, 1H), 7.33 – 7.15 (*m*, 4H), 4.45 (*d*,  $J$  = 2.4 Hz, 1H), 4.26 (*m*, 1H), 4.15 – 4.04 (*m*, 8H), 3.21 – 2.91 (*m*, 4H), 2.04 (*s*, 3H), 1.61 – 1.48 (*m*, 4H), 1.37 – 1.19 (*m*, 4H), 0.90 (*m*, 9H);  $^{13}\text{C}$  NMR ( $\text{CDCl}_3$ )  $\delta$  171.7, 170.2, 159.9, 136.4, 129.4, 128.6, 127.1, 84.8, 65.4, 60.5, 58.6, 58.0, 40.3, 30.5, 21.1, 19.3, 19.0, 14.6, 14.2, 13.7.  $[\alpha]_D^{25} = -77.13^\circ \pm 0.01$  (*c* 0.6, MeOH). ATR-FT-IR absorption bands in  $\text{cm}^{-1}$ : 1604 (C=C bond stretching), 1720 (C=O bond stretching), 2810–3440  $\text{cm}^{-1}$  (N-H bond stretching).

**Ethyl (S,Z)-3-((3-(4-hydroxyphenyl)-1-methoxy-1-oxopropan-2-yl)amino)but-2-enoate (25,  $\text{C}_{16}\text{H}_{21}\text{NO}_5$ )**

$^1\text{H}$ -NMR ( $\text{CDCl}_3$ )  $\delta$  8.83 (*d*,  $J$  = 9.5 Hz, 1H), 6.99 (*d*,  $J$  = 8.1 Hz, 2H), 6.72 (*d*,  $J$  = 8.1 Hz, 2H), 4.46 (*m*, 1H), 4.26 (*m*, 1H), 4.10 (*m*, 2H), 3.70 (*s*, 2H), 3.70 (*s*, 2H), 3.08 – 2.88 (*m*, 2H), 1.67 (*s*, 2H), 1.24 (*t*,  $J$  = 7.2 Hz, 3H);  $^{13}\text{C}$  NMR ( $\text{CDCl}_3$ )  $\delta$  172.2, 170.7, 160.4, 155.6, 130.5, 127.4, 115.7, 84.6, 77.2, 76.8, 60.6, 58.9, 58.0, 52.6, 39.4, 19.5, 14.6.  $[\alpha]_D^{25} = -14.92^\circ \pm 0.01$  (*c* 0.6, MeOH). ATR-FT-IR absorption bands in  $\text{cm}^{-1}$ : 1602 (C=C bond stretching), 1738 (C=O bond stretching), 2820–3450  $\text{cm}^{-1}$  (N-H bond stretching).

**Ethyl (S,Z)-3-((1-ethoxy-3-(4-hydroxyphenyl)-1-oxopropan-2-yl)amino)but-2-enoate (26,  $\text{C}_{17}\text{H}_{23}\text{NO}_5$ )**

$^1\text{H}$ -NMR ( $\text{CDCl}_3$ )  $\delta$  8.86 (*d*,  $J$  = 9.5 Hz, 1H), 7.04 (*d*,  $J$  = 8.3 Hz, 2H), 6.73 (*d*,  $J$  = 8.1 Hz, 2H), 4.46 (*m*, 1H), 4.23 (*m*, 1H), 4.17 (*m*, 2H), 4.10 (*m*, 2H), 3.09 – 2.88 (*m*, 2H), 1.67 (*s*, 3H), 1.24 (*m*, 6H);  $^{13}\text{C}$  NMR ( $\text{CDCl}_3$ )  $\delta$  171.8, 170.5, 160.2, 155.1, 130.7, 128.1, 115.6, 84.7, 77.5, 77.2, 76.8, 61.7, 58.8, 58.2, 39.4, 19.5, 14.7, 14.3,  $[\alpha]_D^{25} = -107.5^\circ \pm 0.01$  (*c* 0.6, MeOH). ATR-FT-IR absorption bands in  $\text{cm}^{-1}$ : 1602 (C=C bond stretching), 1739 (C=O bond stretching), 2810–3440  $\text{cm}^{-1}$  (N-H bond stretching).

**Ethyl (S,Z)-3-((3-(4-hydroxyphenyl)-1-isopropoxy-1-oxopropan-2-yl)amino)but-2-enoate (27,  $\text{C}_{18}\text{H}_{25}\text{NO}_5$ )**

<sup>1</sup>H-NMR (CDCl<sub>3</sub>) δ 8.82 (*d*, *J* = 9.1 Hz, 1H), 7.04 (*d*, *J* = 8.3 Hz, 2H), 6.71 (*d*, *J* = 8.3 Hz, 2H), 5.01 (*m*, 1H), 4.47 (*m*, 1H), 4.21 (*m*, 1H), 4.10 (*m*, 2H), 3.04 (*m*, 1H), 2.92 (*m*, 1H), 1.70 (*s*, 3H), 1.12 – 1.38 (*m*, 6H), 1.24 (*t*, *J* = 7.1 Hz, 1H), 1.21 (*m*, 6H); <sup>13</sup>C NMR (CDCl<sub>3</sub>) δ 171.6, 171.4, 170.9, 170.6, 160.6, 160.5, 155.8, 155.5, 130.6, 69.4, 60.6, 58.9, 58.2, 50.8, 50.4, 39.2, 25.3, 21.8, 21.2, 19.5, 14.6, 14.3, [ $\alpha$ ]<sub>D</sub><sup>25</sup> = -56.67° ± 0.01 (c 0.6, MeOH). ATR-FT-IR absorption bands in cm<sup>-1</sup>: 1603 (C=C bond stretching), 1729 (C=O bond stretching), 2820–3440 cm<sup>-1</sup> (N-H bond stretching).

**Ethyl (S,Z)-3-((1-butoxy-3-(4-hydroxyphenyl)-1-oxopropan-2-yl)amino)but-2-enoate (28, C<sub>19</sub>H<sub>27</sub>NO<sub>5</sub>)**

<sup>1</sup>H-NMR (CDCl<sub>3</sub>) δ 8.82 (*d*, *J* = 9.4 Hz, 1H), 7.02 (*d*, *J* = 8.3 Hz, 2H), 6.72 (*d*, *J* = 8.3 Hz, 2H), 4.48 (*s*, 1H), 4.25 (*m*, 1H), 4.11 (*t*, *J* = 6.7 Hz, 2H), 4.01 – 4.07 (*m*, 2H), 3.05 (*m*, 1H), 2.92 (*m*, 1H), 1.70 (*s*, 3H), 1.59 (*m*, 4H), 1.34 (*m*, 4H), 0.91 (*t*, *J* = 7.3 Hz, 6H); <sup>13</sup>C NMR (CDCl<sub>3</sub>) δ 172.0, 170.8, 160.4, 155.5, 130.5, 127.3, 115.6, 84.6, 65.5, 62.9, 58.1, 39.2, 30.5, 19.5, 19.2, 19.0, 13.7. [ $\alpha$ ]<sub>D</sub><sup>25</sup> = -98.33° ± 0.01 (c 0.6, MeOH). ATR-FT-IR absorption bands in cm<sup>-1</sup>: 1604 (C=C bond stretching), 1738 (C=O bond stretching), 2820–3440 cm<sup>-1</sup> (N-H bond stretching).

**Ethyl (S,Z)-3-((1-methoxy-1-oxopropan-2-yl)amino)but-2-enoate (29, C<sub>10</sub>H<sub>17</sub>NO<sub>4</sub>)**

<sup>1</sup>H-NMR (CDCl<sub>3</sub>) δ 8.75 (*d*, *J* = 8.7 Hz, 1H), 4.53 (*s*, 1H), 4.19 (*m*, 2H), 4.10 (*q*, *J* = 7.1 Hz, 1H), 3.74 (*s*, 3H), 2.27 (*s*, 3H), 1.48 (*d*, *J* = 7.0 Hz, 3H), 1.25 (*t*, 3H); <sup>13</sup>C NMR (CDCl<sub>3</sub>) δ 200.7, 173.4, 170.8, 167.7, 160.2, 84.2, 52.7, 52.5, 51.5, 50.3, 50.0, 30.3, 19.5, [ $\alpha$ ]<sub>D</sub><sup>25</sup> = 25.00° ± 0.01 (c 0.6, MeOH).

**Ethyl (S,Z)-3-((1-ethoxy-1-oxopropan-2-yl)amino)but-2-enoate (30, C<sub>11</sub>H<sub>19</sub>NO<sub>4</sub>)**

<sup>1</sup>H-NMR (CDCl<sub>3</sub>) δ 7.46 (*d*, *J* = 7.4 Hz, 1H), 4.48 (*q*, *J* = 7.2 Hz, 1H), 4.12 (*q*, *J* = 7.0 Hz, 4H), 3.39 (*s*, 1H), 2.21 (*s*, 3H), 1.35 (*d*, *J* = 7.2 Hz, 3H), 1.21 (*t*, *J* = 7.1 Hz, 6H); <sup>13</sup>C NMR (CDCl<sub>3</sub>) δ 204.0, 172.7, 165.5, 61.5, 49.8, 48.2, 30.8, 18.0, 14.1, [ $\alpha$ ]<sub>D</sub><sup>25</sup> = -55.00° ± 0.01 (c 0.6, MeOH).

**Ethyl (S,Z)-3-((1-isopropoxy-1-oxopropan-2-yl)amino)but-2-enoate (31, C<sub>12</sub>H<sub>21</sub>NO<sub>4</sub>)**

<sup>1</sup>H-NMR (CDCl<sub>3</sub>) δ 8.70 (*d*, *J* = 8.7 Hz, 1H), 5.00 (*m*, 1H), 4.47 (*s*, 1H), 4.06 (*m*, 2H), 1.84 (*s*, 2H), 1.41 (*d*, *J* = 7.0 Hz, 2H), 1.24 – 1.17 (*m*, 9H); <sup>13</sup>C NMR (CDCl<sub>3</sub>) δ 172.4, 170.3, 160.1, 84.4, 69.0, 58.5, 51.6, 21.7, 19.4, 19.3, 14.6, [ $\alpha$ ]<sub>D</sub><sup>25</sup> = 40.00° ± 0.01 (c 0.6, MeOH).

**Ethyl (S,Z)-3-((1-butoxy-1-oxopropan-2-yl)amino)but-2-enoate (32, C<sub>13</sub>H<sub>23</sub>NO<sub>4</sub>)**

<sup>1</sup>H-NMR (CDCl<sub>3</sub>) δ 8.75 (*d*, *J* = 8.3 Hz, 1H), 4.53 (*s*, 1H), 4.15 (*m*, 1H), 4.10 (*q*, *J* = 7.1 Hz, 2H), 1.89 (*s*, 3H), 1.58 – 1.67 (*m*, 2H), 1.48 (*d*, *J* = 7.0 Hz, 3H), 1.37 (*m*, 2H), 1.25 (*t*, *J* = 7.1 Hz, 3H), 0.93 (*t*, *J* = 7.4 Hz, 4H); <sup>13</sup>C NMR (CDCl<sub>3</sub>) δ 173.0, 170.36, 160.1, 84.5, 65.3, 58.6, 51.5, 30.6, 19.4, 19.4, 19.0, 14.6, 13.7. [ $\alpha$ ]<sub>D</sub><sup>25</sup> = 23.33° ± 0.01 (c 0.6, MeOH).

**Methyl (3-oxocyclohex-1-en-1-yl)-L-phenylalaninate (37, C<sub>16</sub>H<sub>19</sub>NO<sub>3</sub>)**

<sup>1</sup>H-NMR (CDCl<sub>3</sub>) δ 7.30 – 7.21 (*m*, 1H), 7.07 – 6.99 (*m*, 1H), 5.13 (*s*, 1H), 5.02 (*d*, *J* = 7.6 Hz, 1H), 4.33 (*m*, 1H), 3.71 (*s*, 2H), 3.22 – 3.00 (*m*, 2H), 2.31 (*m*, 2H), 1.95 (*m*, 1H), 1.23 (*d*, *J* = 8.6 Hz, 3H); <sup>13</sup>C NMR (CDCl<sub>3</sub>) δ 197.6, 171.7, 162.5, 135.3, 129.3, 128.8, 127.4, 98.4, 55.8, 52.6, 37.2, 36.5, 29.7, 21.9, [ $\alpha$ ]<sub>D</sub><sup>25</sup> = -10.83° ± 0.01 (c 0.6, MeOH). ESI-HRMS *m/z* [M+H]<sup>+</sup>, 274.1443 (calcd. 274.1438); ATR-FT-IR absorption bands in cm<sup>-1</sup>: 1597 (C=C bond stretching), 1736 (C=O bond stretching), 3266 cm<sup>-1</sup> (N-H bond stretching).

**Ethyl (3-oxocyclohex-1-en-1-yl)-L-phenylalaninate (38, C<sub>17</sub>H<sub>21</sub>NO<sub>3</sub>)**

<sup>1</sup>H-NMR (CDCl<sub>3</sub>) δ 7.34 – 7.03 (*m*, 5H), 5.16 (*s*, 1H), 4.95 (*d*, *J* = 7.5 Hz, 2H), 4.32 (*q*, *J* = 6.3 Hz, 1H), 4.16 (*q*, *J* = 7.2 Hz, 2H), 3.22 – 3.02 (*m*, 2H), 2.32 (*t*, *J* = 6.4 Hz, 4H), 1.96 (*m*, 2H), 1.23 (*t*, *J* = 7.1 Hz, 3H); <sup>13</sup>C NMR (CDCl<sub>3</sub>) δ 197.7, 171.3, 162.4, 135.4, 129.4, 128.7, 127.4, 98.4, 62.0, 55.8, 37.2, 36.5, 29.8, 22.0, 14.2, [α]<sub>D</sub><sup>25</sup> = -21.89° ± 0.01 (*c* 0.6, MeOH). ATR-FT-IR absorption bands in cm<sup>-1</sup>: 1597 (C=C bond stretching), 1736 (C=O bond stretching), 3266 cm<sup>-1</sup> (N-H bond stretching).

**Isopropyl (3-oxocyclohex-1-en-1-yl)-L-phenylalaninate (39, C<sub>18</sub>H<sub>23</sub>NO<sub>3</sub>)**

<sup>1</sup>H-NMR (CDCl<sub>3</sub>) δ 7.21 – 7.31 (*m*, 3H), 7.11 (*m*, 2H), 5.47 (*d*, *J* = 7.0 Hz, 1H), 5.16 (*s*, 1H), 4.99 (*m*, 1H), 4.29 (*m*, 1H), 3.16 (*m*, 1H), 3.08 (*m*, 1H), 2.35 (*t*, *J* = 6.1 Hz, 2H), 2.31 (*t*, *J* = 6.4 Hz, 2H), 1.95 (*m*, 2H), 1.23 (*m*, 6H); <sup>13</sup>C NMR (CDCl<sub>3</sub>) δ 197.7, 170.8, 163.1, 135.4, 129.3, 128.5, 127.2, 97.8, 69.8, 56.0, 37.0, 36.4, 29.6, 21.8, 21.8, 21.6. [α]<sub>D</sub><sup>25</sup> = -12.50° ± 0.01 (*c* 0.6, MeOH). ESI-HRMS *m/z* [M+H]<sup>+</sup>, 302.1982 (calcd. 302.1756); ATR-FT-IR absorption bands in cm<sup>-1</sup>: 1600 (C=C bond stretching), 1739 (C=O bond stretching), 3266 cm<sup>-1</sup> (N-H bond stretching).

**Butyl (3-oxocyclohex-1-en-1-yl)-L-phenylalaninate (40, C<sub>19</sub>H<sub>25</sub>NO<sub>3</sub>)**

<sup>1</sup>H-NMR (CDCl<sub>3</sub>) δ 7.23 – 7.31 (*m*, 3H), 7.09 (*d*, *J* = 7.2 Hz, 2H), 5.49 (*d*, *J* = 7.2 Hz, 1H), 5.15 (*s*, 1H), 4.33 (*m*, 1H), 4.09 (*m*, 2H), 3.17 (*m*, 1H), 3.09 (*m*, 1H), 2.35 (*t*, *J* = 6.1 Hz, 2H), 2.31 (*t*, *J* = 6.4 Hz, 2H), 1.95 (*m*, 2H), 1.51 – 1.60 (*m*, 2H), 1.39 (*m*, 2H), 0.91 (*t*, *J* = 7.4 Hz, 3H); <sup>13</sup>C NMR (CDCl<sub>3</sub>) δ 197.7, 171.4, 163.1, 135.4, 129.2, 128.6, 127.2, 97.8, 65.6, 56.0, 37.1, 36.4, 30.4, 29.5, 21.8, 19.0, 13.7. [α]<sub>D</sub><sup>25</sup> = -9.27° ± 0.01 (*c* 0.6, MeOH). ESI-HRMS *m/z* [M+H]<sup>+</sup>, 316.2156 (calcd. 316.1913); ATR-FT-IR absorption bands in cm<sup>-1</sup>: 1594 (C=C bond stretching), 1737 (C=O bond stretching), 3060 cm<sup>-1</sup> (N-H bond stretching).

**Methyl (3-oxocyclohex-1-en-1-yl)-L-tyrosinate (41, C<sub>16</sub>H<sub>19</sub>NO<sub>4</sub>)**

<sup>1</sup>H-NMR (CDCl<sub>3</sub>) δ 7.29 (*s*, 1H), 6.86 (*d*, *J* = 8.2 Hz, 2H), 6.78 (*d*, *J* = 8.2 Hz, 2H), 5.44 (*d*, *J* = 7.4 Hz, 1H), 5.11 (*s*, 1H), 4.26 (*q*, *J* = 6.1 Hz, 1H), 3.71 (*s*, 3H), 2.99 (*m*, 2H), 2.39 – 2.28 (*m*, 4H), 1.94 (*m*, 2H); <sup>13</sup>C NMR (CDCl<sub>3</sub>) δ 198.8, 171.7, 164.6, 156.4, 130.2, 125.7, 115.9, 104.5, 97.4, 60.6, 56.1, 52.7, 36.4, 35.9, 29.7, 21.2, [α]<sub>D</sub><sup>25</sup> = 5.83° ± 0.01 (*c* 0.6, MeOH). ESI-HRMS *m/z* [M+H]<sup>+</sup>, 290.1392 (calcd. 290.1387); ATR-FT-IR absorption bands in cm<sup>-1</sup>: 1594 (C=C bond stretching), 1731 (C=O bond stretching), 3064 cm<sup>-1</sup> (N-H bond stretching).

**Ethyl (3-oxocyclohex-1-en-1-yl)-L-tyrosinate (42, C<sub>17</sub>H<sub>21</sub>NO<sub>4</sub>)**

<sup>1</sup>H-NMR (CDCl<sub>3</sub>) δ 7.26 (*s*, 1H), 6.84 (*d*, *J* = 8.1 Hz, 2H), 6.76 (*d*, *J* = 8.2 Hz, 1H), 5.30 (*d*, *J* = 7.5 Hz, 1H), 5.13 (*s*, 1H), 4.22 (*q*, *J* = 6.1 Hz, 1H), 4.17 – 4.06 (*m*, 2H), 3.70 (*q*, *J* = 7.1 Hz, 2H), 2.98 (*m*, 2H), 2.31 (*d*, *J* = 6.5 Hz, 2H), 1.92 (*m*, 1H), 1.22 (*m*, 3H); <sup>13</sup>C NMR (CDCl<sub>3</sub>) δ 198.7, 171.3, 164.2, 156.4, 130.3, 125.6, 115.8, 97.5, 62.0, 60.6, 58.4, 56.0, 36.2, 29.8, 21.8, 21.2, 18.4, 14.2. [α]<sub>D</sub><sup>25</sup> = 7.50° ± 0.01 (*c* 0.6, MeOH). ATR-FT-IR absorption bands in cm<sup>-1</sup>: 1594 (C=C bond stretching), 1732 (C=O bond stretching), 3064 cm<sup>-1</sup> (N-H bond stretching).

**Isopropyl (3-oxocyclohex-1-en-1-yl)-L-tyrosinate (43, C<sub>18</sub>H<sub>23</sub>NO<sub>4</sub>)**

<sup>1</sup>H-NMR (CDCl<sub>3</sub>) δ 6.89 (*d*, *J* = 8.3 Hz, 2H), 6.79 (*d*, *J* = 8.3 Hz, 2H), 5.58 (*d*, *J* = 6.9 Hz, 1H), 5.15 (*s*, 1H), 4.99 (*m*, 1H), 4.22 (*m*, 1H), 3.04 (*m*, 1H), 2.95 (*m*, 1H), 2.29 – 2.41 (*m*, 4H), 1.89 – 1.97 (*m*, 2H), 1.21 (*m*, 6H); <sup>13</sup>C NMR (CDCl<sub>3</sub>) δ 198.8, 170.8, 164.9, 156.4, 130.3, 125.7, 115.8, 97.2, 70.0, 56.2, 36.2, 35.8, 29.6,

21.7, 21.7.  $[\alpha]_D^{25} = -4.17^\circ \pm 0.01$  (c 0.6, MeOH). ESI-HRMS  $m/z$   $[M+H]^+$ , 318.1702 (calcd. 318.1700); ATR-FT-IR absorption bands in  $\text{cm}^{-1}$ : 1595 (C=C bond stretching), 1741 (C=O bond stretching), 3050  $\text{cm}^{-1}$  (N-H bond stretching).

**Butyl (3-oxocyclohex-1-en-1-yl)-L-tyrosinate (44,  $\text{C}_{19}\text{H}_{25}\text{NO}_4$ )**

$^1\text{H-NMR}$  ( $\text{CDCl}_3$ )  $\delta$  6.87 (*d*,  $J = 8.4$  Hz, 2H), 6.78 (*d*,  $J = 8.4$  Hz, 2H), 5.40 (*d*,  $J = 7.0$  Hz, 1H), 5.12 (*s*, 1H), 4.27 (*m*, 1H), 4.11 (*t*,  $J = 6.8$  Hz, 2H), 3.06 (*m*, 1H), 2.94 (*m*, 1H), 2.29 – 2.36 (*m*, 4H), 1.89 – 1.97 (*m*, 2H), 1.59 (*m*, 2H), 1.34 (*m*, 2H), 0.92 (*t*,  $J = 7.4$  Hz, 3H);  $^{13}\text{C NMR}$  ( $\text{CDCl}_3$ )  $\delta$  198.8, 171.3, 164.6, 156.4, 130.3, 125.7, 115.8, 97.3, 65.9, 56.1, 36.4, 35.8, 30.4, 29.7, 21.7, 19.1, 13.7.  $[\alpha]_D^{25} = -4.17^\circ \pm 0.01$  (c 0.6, MeOH). ESI-HRMS  $m/z$   $[M+Na]^+$ , 354.1677 (calcd. 354.1676); ATR-FT-IR absorption bands in  $\text{cm}^{-1}$ : 1594 (C=C bond stretching), 1738 (C=O bond stretching), 3050  $\text{cm}^{-1}$  (N-H bond stretching).

**Methyl (3-oxocyclohex-1-en-1-yl)-L-alaninate (45,  $\text{C}_{10}\text{H}_{15}\text{NO}_3$ )**

$^1\text{H-NMR}$  ( $\text{CDCl}_3$ )  $\delta$  5.17 (*s*, 1H), 5.02 (*s*, 1H), 4.07 (*s*, 1H), 3.75 (*s*, 3H), 2.39 – 2.26 (*m*, 4H), 1.95 (*m*, 2H), 1.43 (*s*, 1H);  $^{13}\text{C NMR}$  ( $\text{CDCl}_3$ )  $\delta$  197.7, 173.2, 162.7, 97.8, 52.8, 50.4, 36.4, 29.7, 21.8, 17.9,  $[\alpha]_D^{25} = -7.69^\circ \pm 0.01$  (c 0.6, MeOH).

**Ethyl (3-oxocyclohex-1-en-1-yl)-L-alaninate (46,  $\text{C}_{11}\text{H}_{17}\text{NO}_3$ )**

$^1\text{H-NMR}$  ( $\text{CDCl}_3$ )  $\delta$  5.05 (*s*, 1H), 5.03 (*s*, 1H), 4.23 (*q*,  $J = 7.1$  Hz, 2H), 4.06 (*m*, 1H), 2.41 – 2.27 (*m*, 4H), 1.97 (*m*, 2H), 1.43 (*d*,  $J = 6.9$  Hz, 3H), 1.30 (*t*,  $J = 7.1$  Hz, 3H);  $^{13}\text{C NMR}$  ( $\text{CDCl}_3$ )  $\delta$  197.7, 173.3, 162.4, 98.0, 62.0, 50.5, 36.4, 29.8, 21.9, 18.0, 14.2.  $[\alpha]_D^{25} = -15.62^\circ \pm 0.01$  (c 0.6, MeOH),

**Isopropyl (3-oxocyclohex-1-en-1-yl)-L-alaninate (47,  $\text{C}_{12}\text{H}_{19}\text{NO}_3$ )**

$^1\text{H-NMR}$  ( $\text{CDCl}_3$ )  $\delta$  5.75 (*d*,  $J = 6.7$  Hz, 1H), 5.06 (*m*, 1H), 5.04 (*s*, 1H), 4.04 (*m*, 1H), 2.41 (*t*,  $J = 6.2$  Hz, 2H), 2.31 (*t*,  $J = 6.4$  Hz, 2H), 1.97 (*m*, 2H), 1.27 (*m*, 6H);  $^{13}\text{C NMR}$  ( $\text{CDCl}_3$ )  $\delta$  197.7, 172.2, 163.5, 97.3, 69.5, 50.6, 36.3, 29.5, 21.8, 21.7, 21.6, 17.7.  $[\alpha]_D^{25} = -22.50^\circ \pm 0.01$  (c 0.6, MeOH).

**Butyl (3-oxocyclohex-1-en-1-yl)-L-alaninate (48,  $\text{C}_{13}\text{H}_{21}\text{NO}_3$ )**

$^1\text{H-NMR}$  ( $\text{CDCl}_3$ )  $\delta$  5.68 (*d*,  $J = 6.8$  Hz, 1H), 5.05 (*s*, 1H), 4.10 – 4.23 (*m*, 2H), 4.09 (*m*, 1H), 2.41 (*t*,  $J = 6.2$  Hz, 2H), 2.31 (*t*,  $J = 6.4$  Hz, 2H), 1.97 (*m*, 2H), 1.60 – 1.69 (*m*, 2H), 1.45 (*d*,  $J = 7.0$  Hz, 3H), 1.39 (*m*, 2H), 0.94 (*t*,  $J = 7.4$  Hz, 3H);  $^{13}\text{C NMR}$  ( $\text{CDCl}_3$ )  $\delta$  197.7, 172.8, 163.4, 97.4, 65.6, 50.6, 36.4, 30.4, 29.5, 21.8, 19.0, 17.8, 13.6.  $[\alpha]_D^{25} = -104.17^\circ \pm 0.01$  (c 0.6, MeOH).

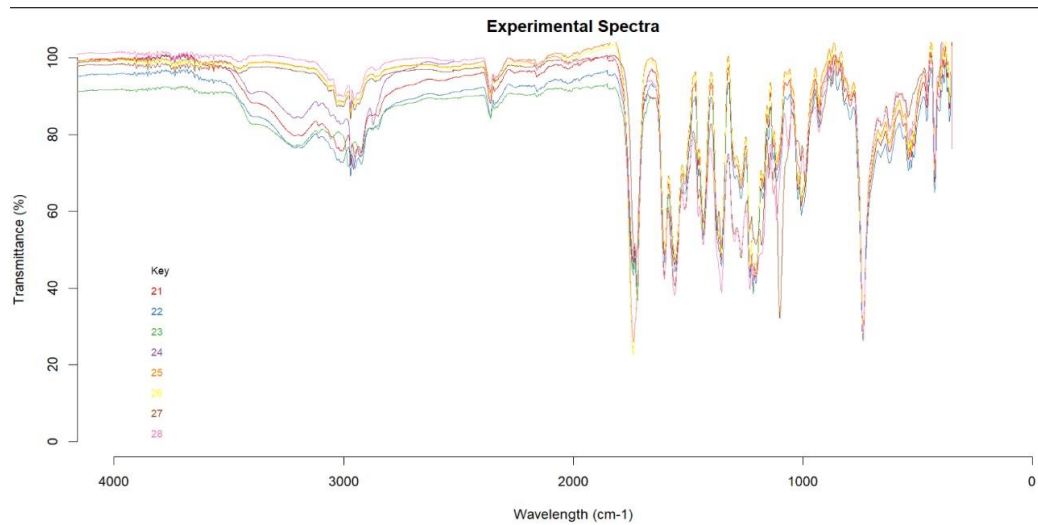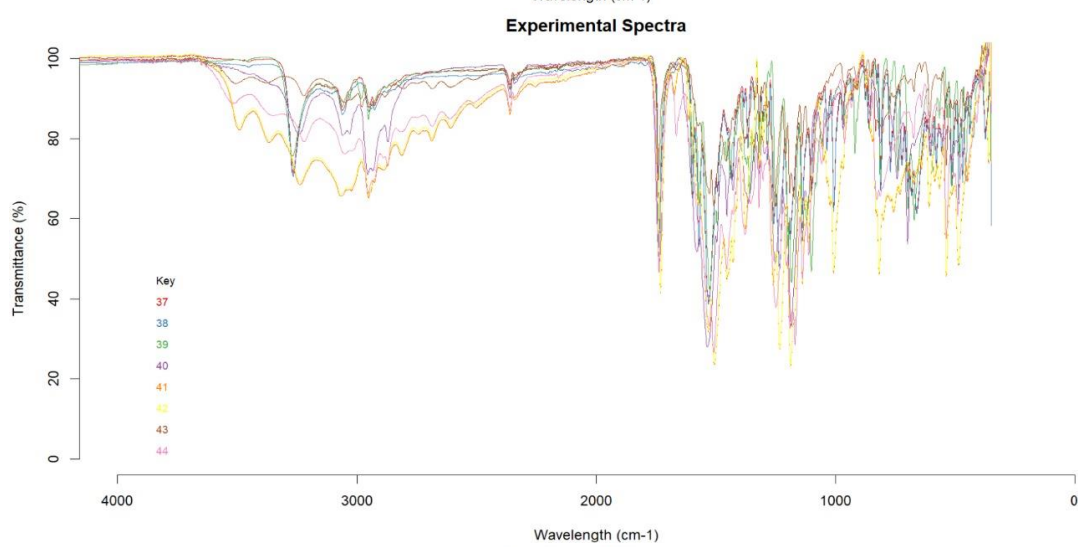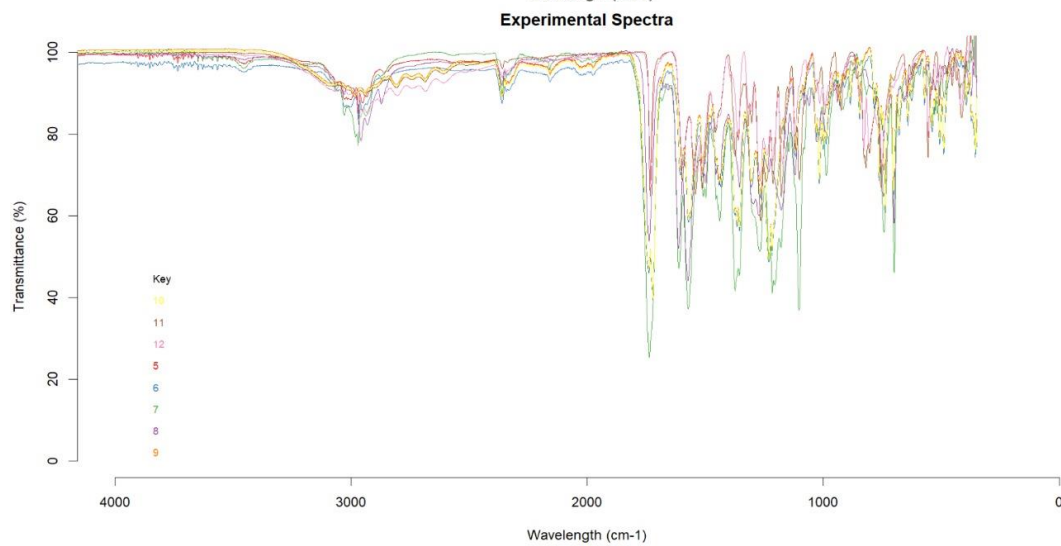

ATR-FT-IR spectra of selected compounds



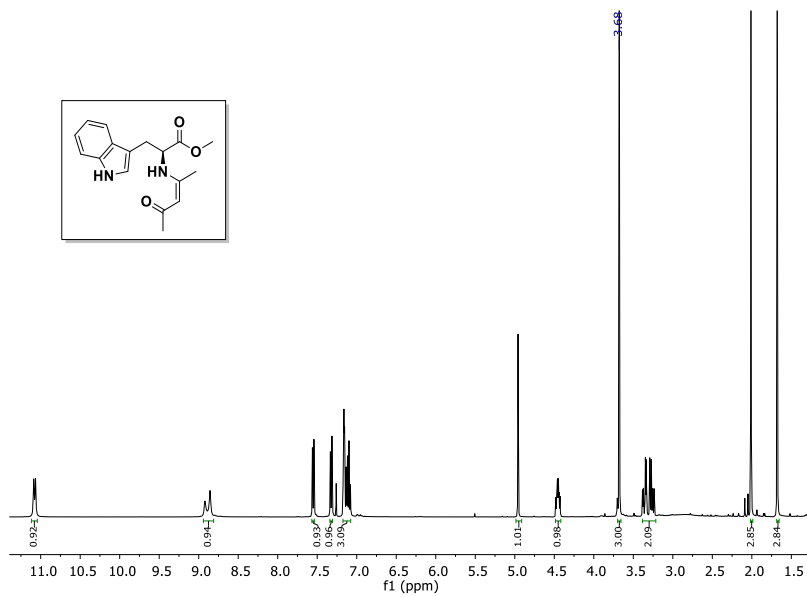

<sup>1</sup>H NMR spectrum of 1 in CDCl<sub>3</sub>.

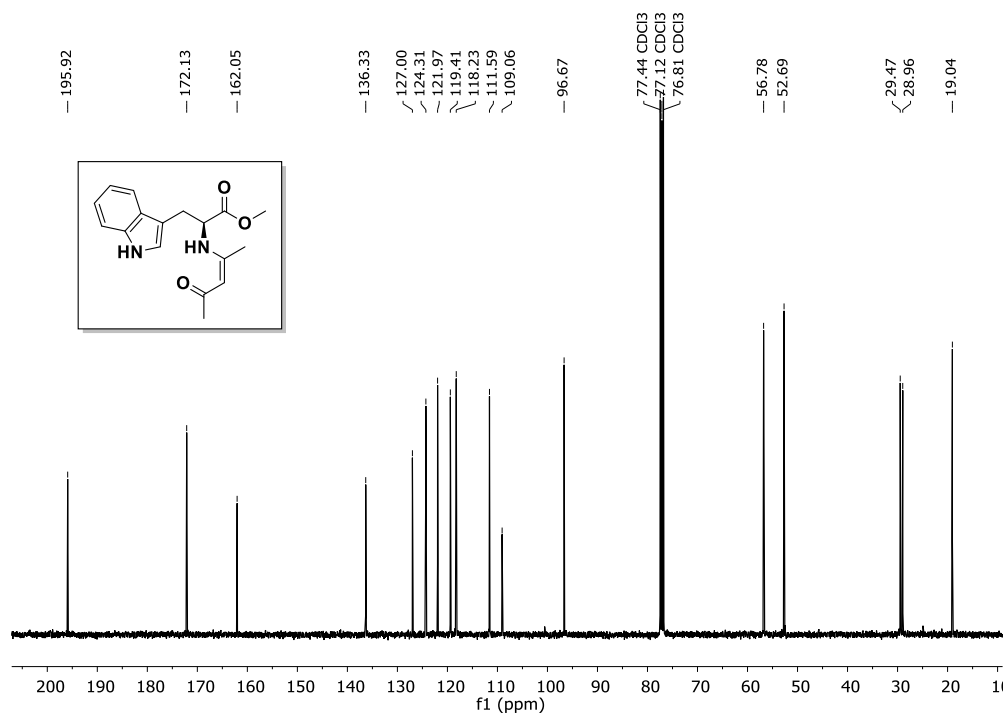

<sup>13</sup>C NMR spectrum of 1 in CDCl<sub>3</sub>.

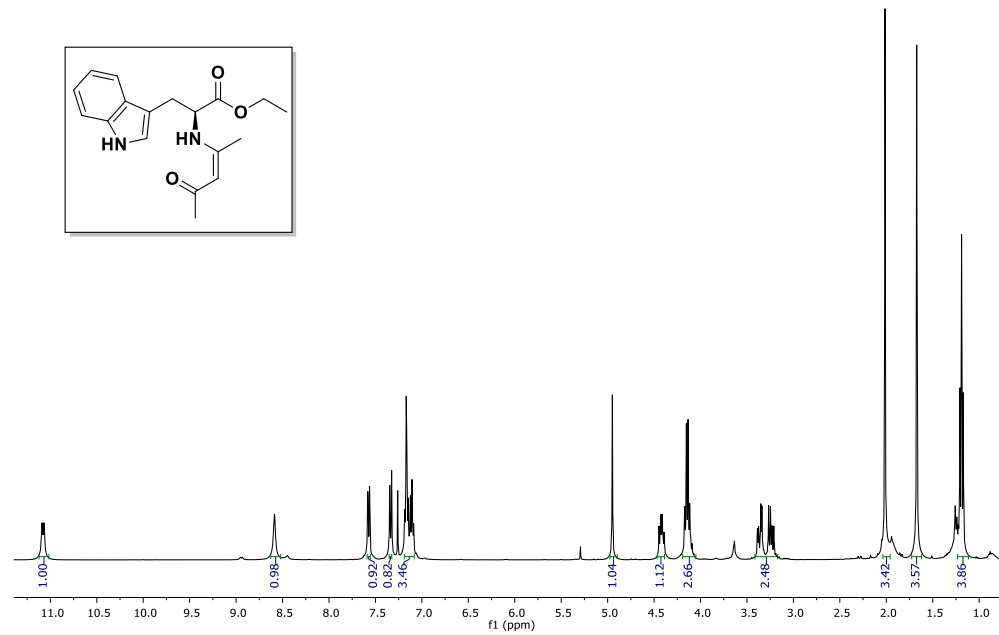

<sup>1</sup>H NMR spectrum of 2 in CDCl<sub>3</sub>.

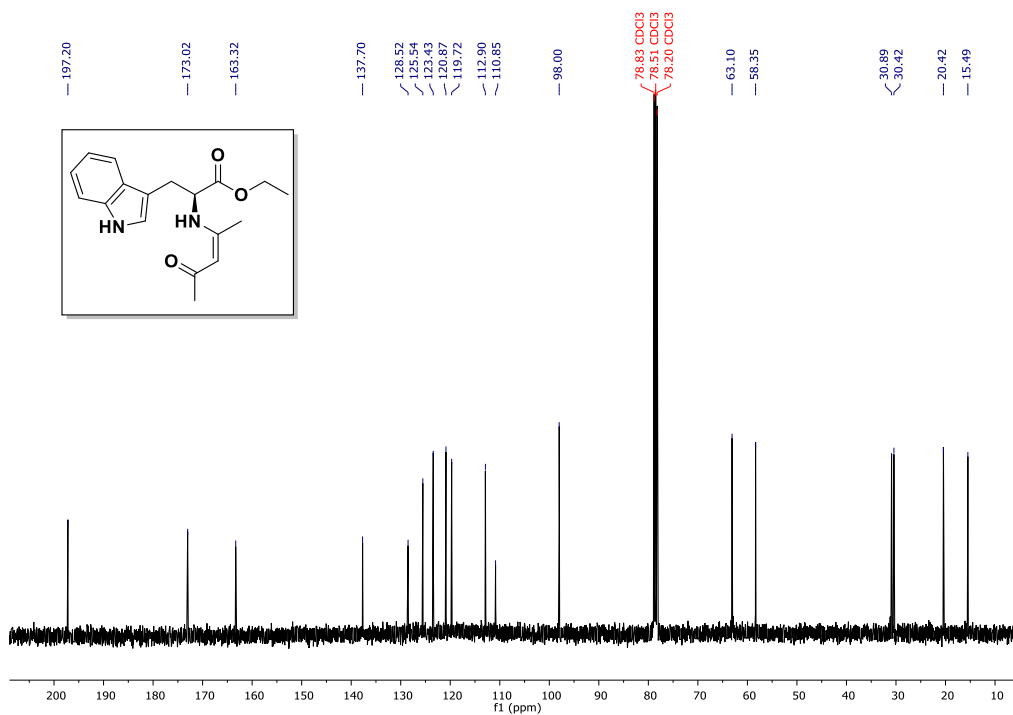

<sup>13</sup>C NMR spectrum of 2 in CDCl<sub>3</sub>.

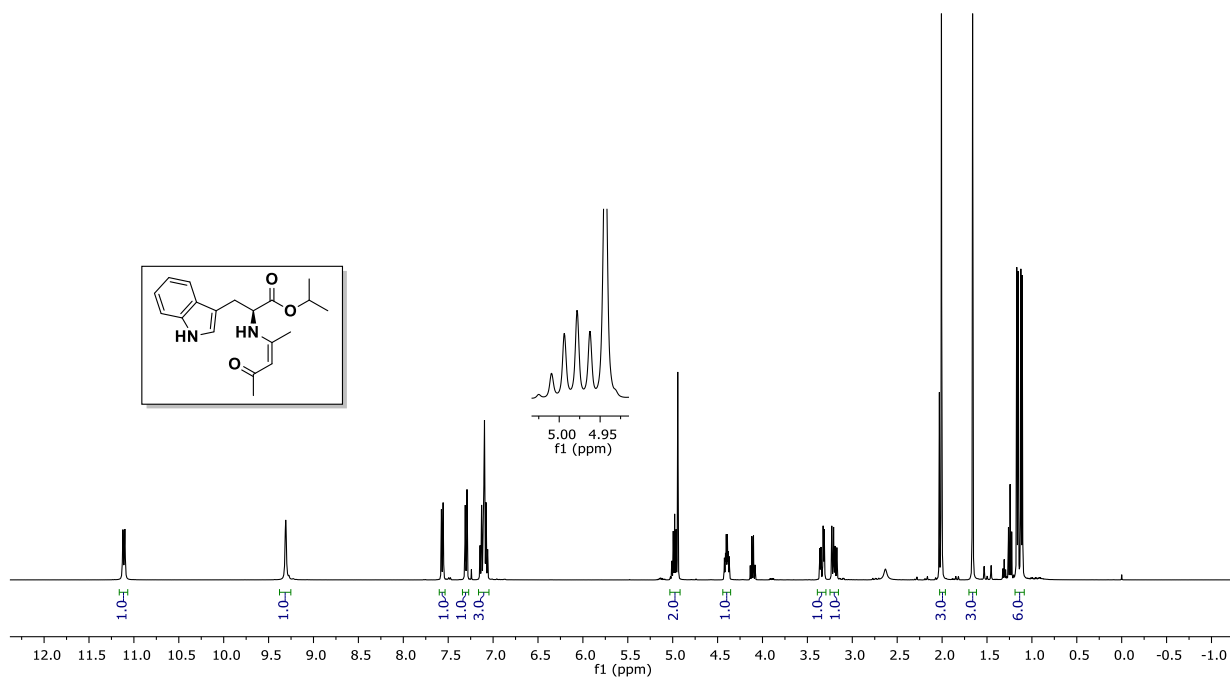

<sup>1</sup>H NMR spectrum of 3 in CDCl<sub>3</sub>.

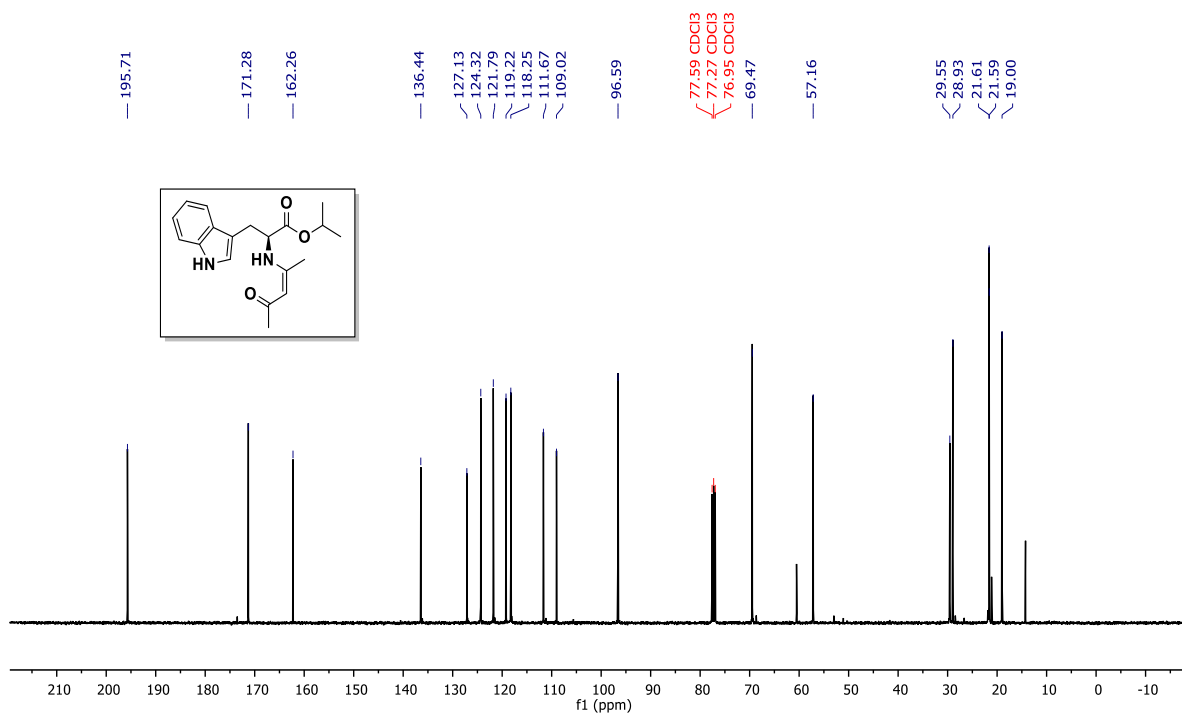

<sup>13</sup>C NMR spectrum of 3 in CDCl<sub>3</sub>.

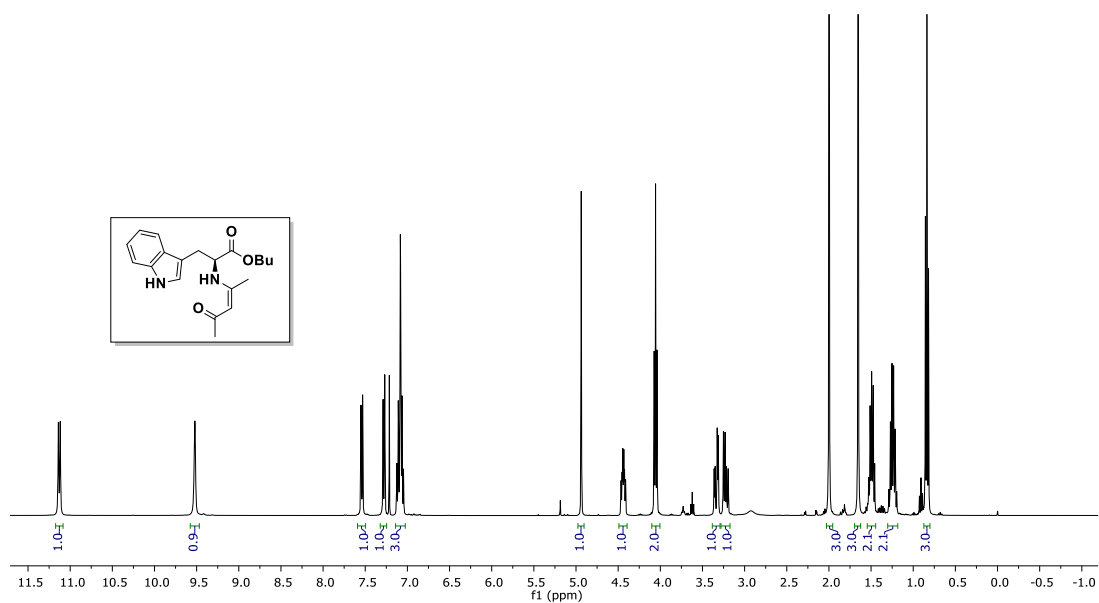

<sup>1</sup>H NMR spectrum of 4 in CDCl<sub>3</sub>.

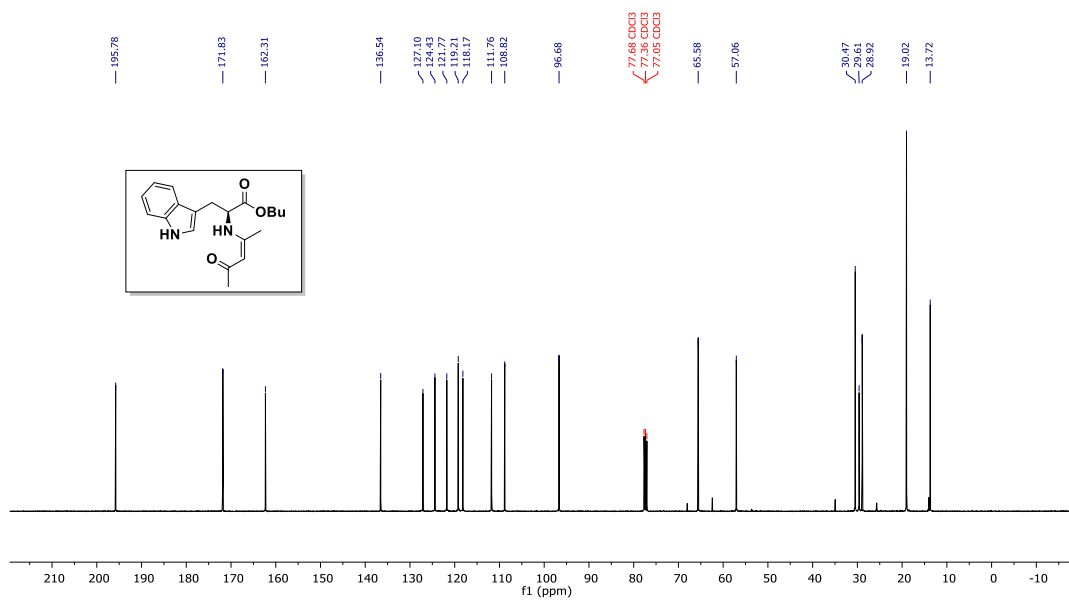

<sup>13</sup>C NMR spectrum of 4 in CDCl<sub>3</sub>.

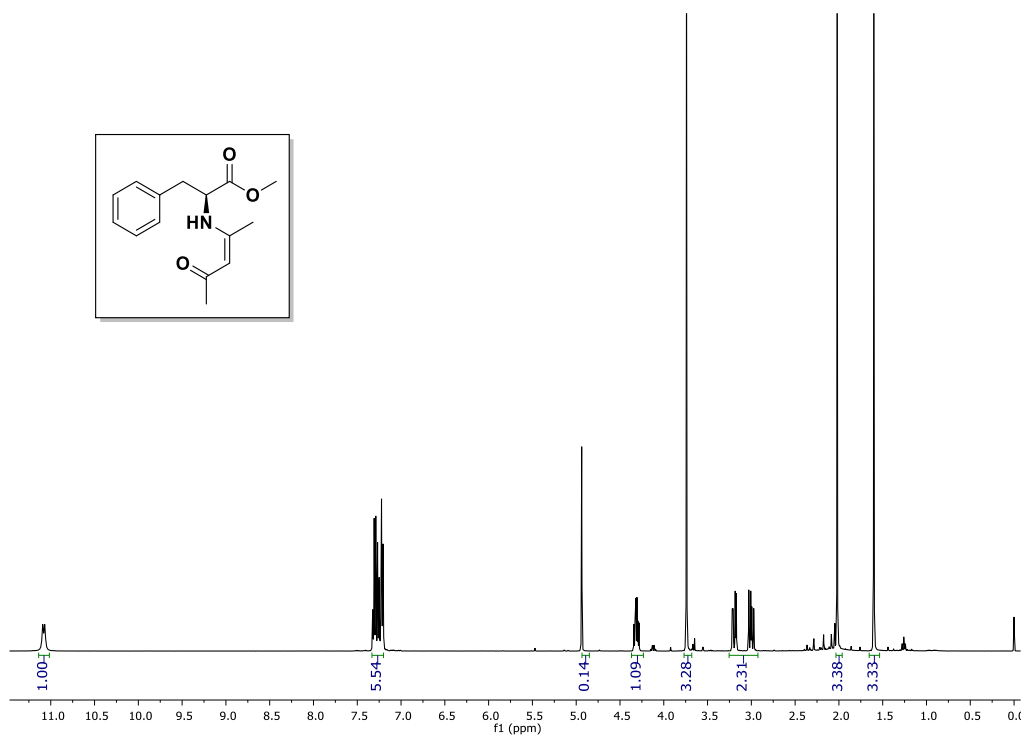

<sup>1</sup>H NMR spectrum of 5 in CDCl<sub>3</sub>.

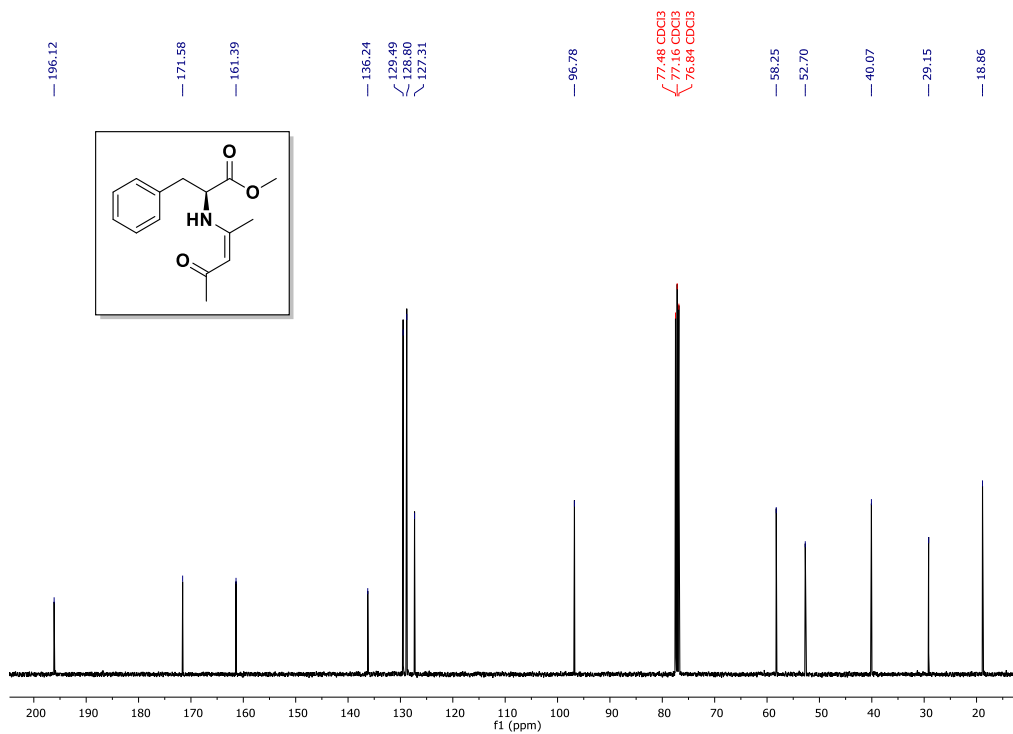

<sup>13</sup>C NMR spectrum of 5 in CDCl<sub>3</sub>.

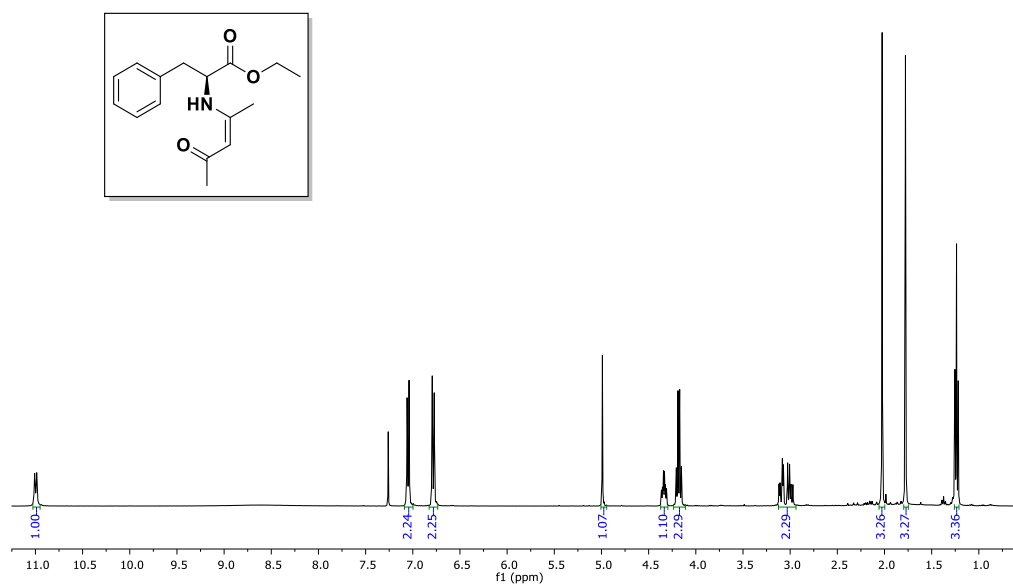

<sup>1</sup>H NMR spectrum of 6 in CDCl<sub>3</sub>.

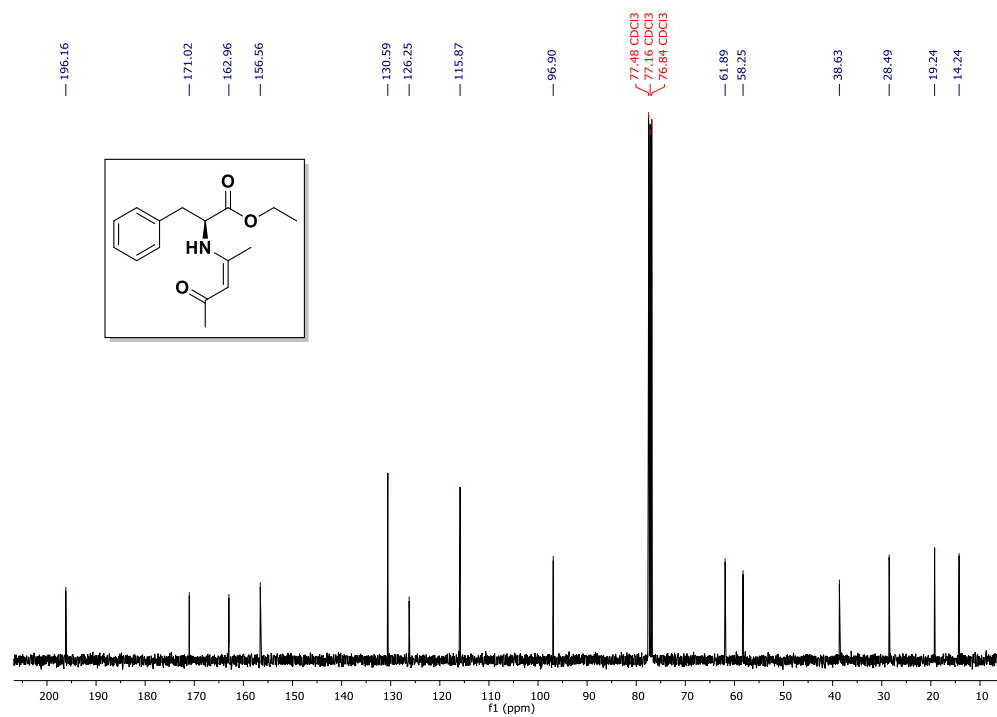

<sup>13</sup>C NMR spectrum of 6 in CDCl<sub>3</sub>.

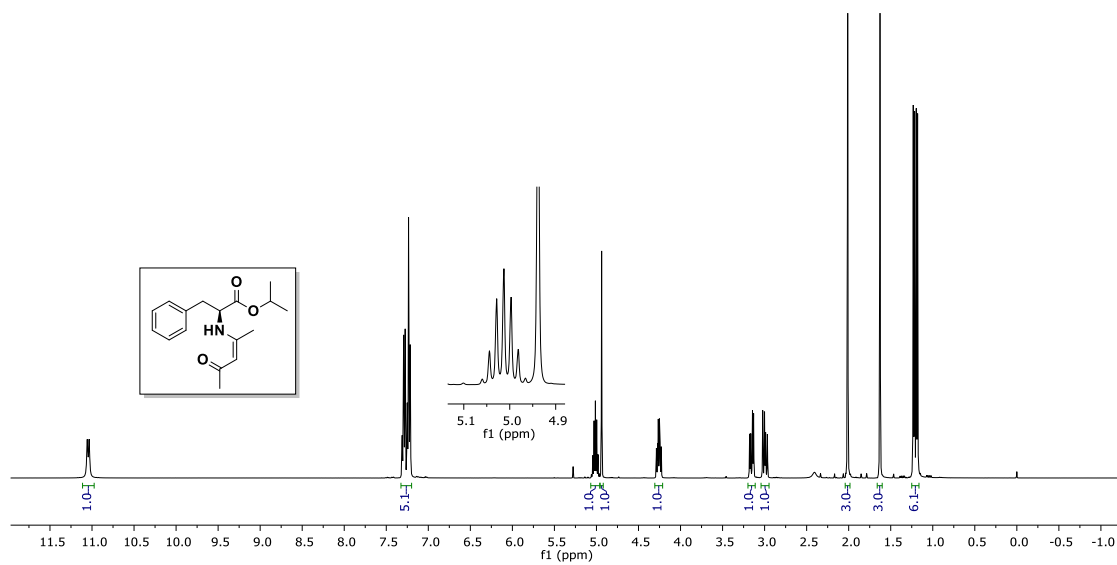

<sup>1</sup>H NMR spectrum of 7 in CDCl<sub>3</sub>.

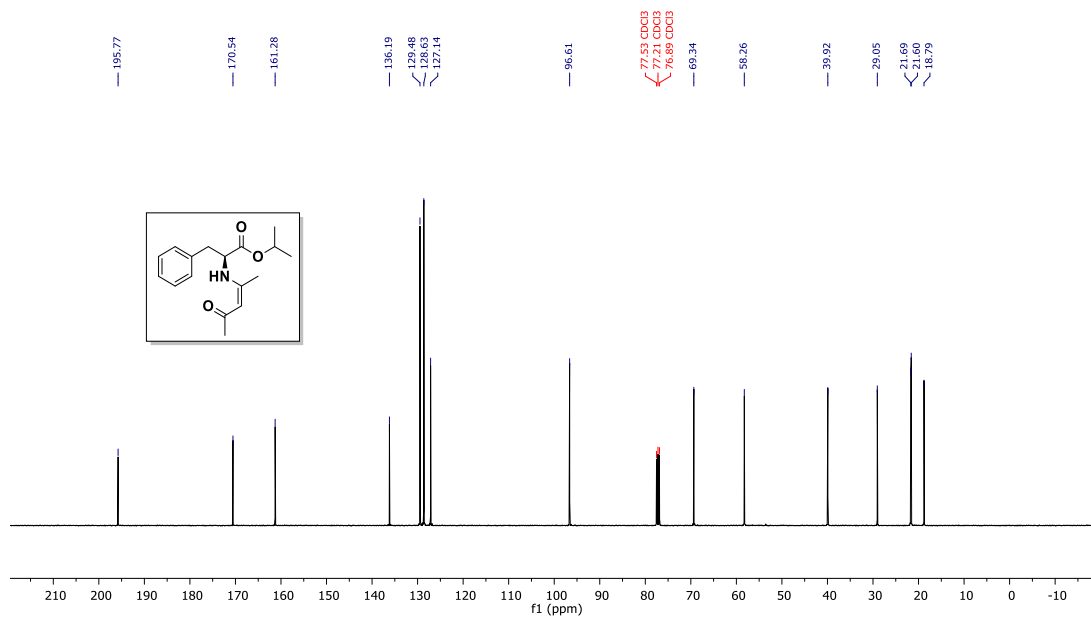

<sup>13</sup>C NMR spectrum of 7 in CDCl<sub>3</sub>.

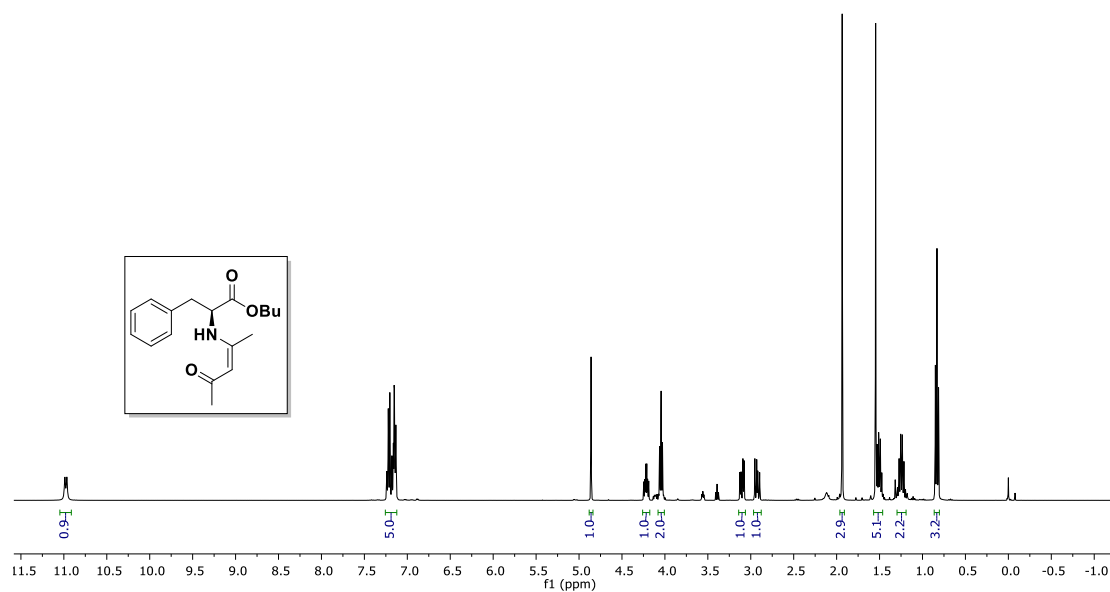

<sup>1</sup>H NMR spectrum of 8 in CDCl<sub>3</sub>.

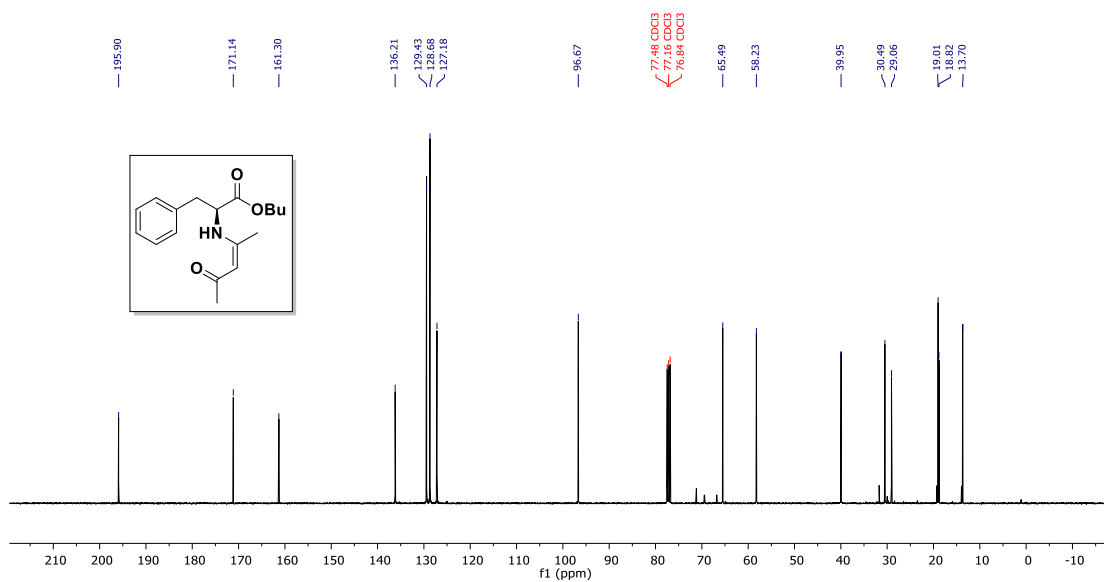

<sup>13</sup>C NMR spectrum of 8 in CDCl<sub>3</sub>.



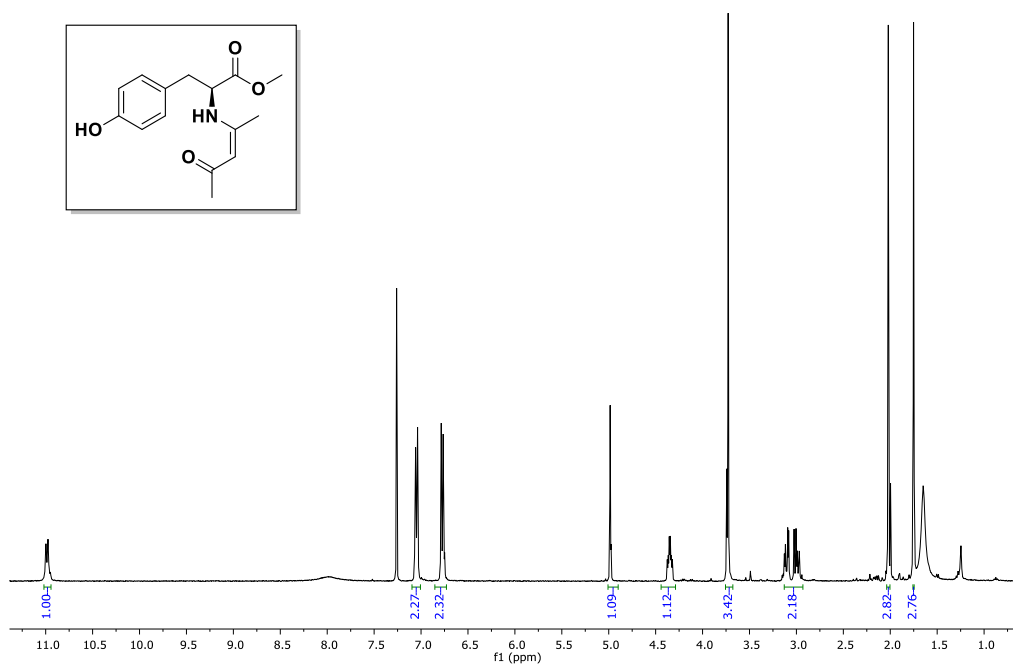

<sup>1</sup>H NMR spectrum of 9 in CDCl<sub>3</sub>.

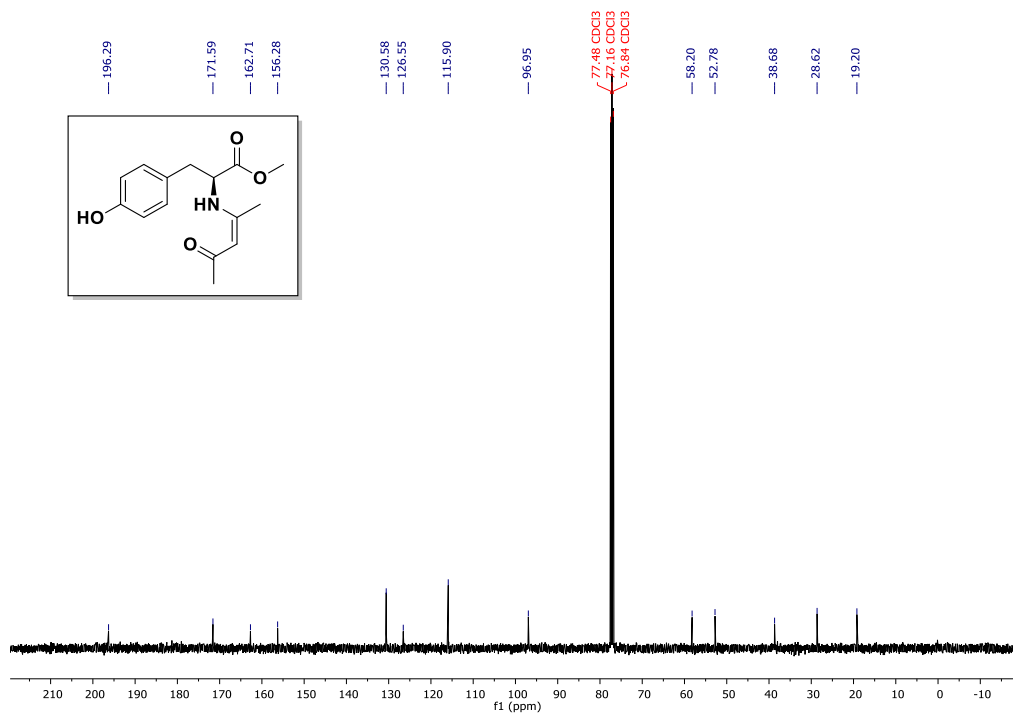

<sup>13</sup>C NMR spectrum of 9 in CDCl<sub>3</sub>.

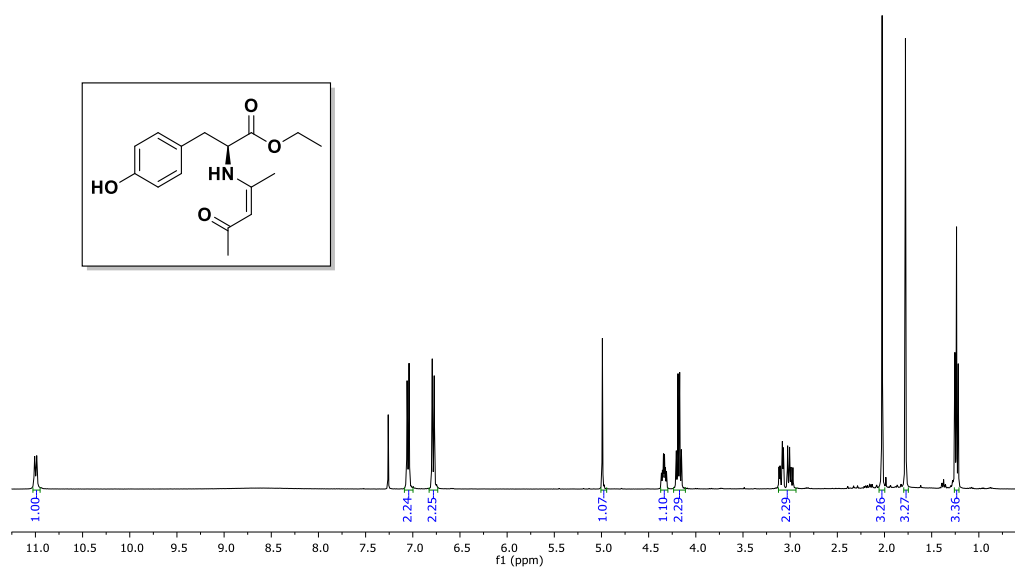

<sup>1</sup>H NMR spectrum of 10 in CDCl<sub>3</sub>.

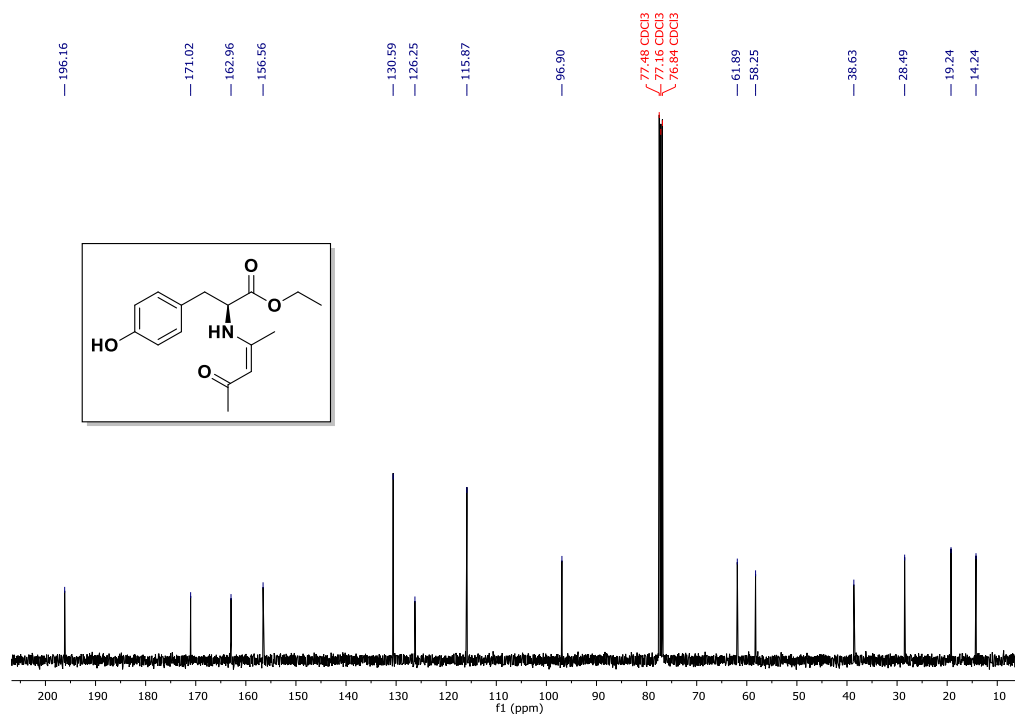

<sup>13</sup>C NMR spectrum of 10 in CDCl<sub>3</sub>.

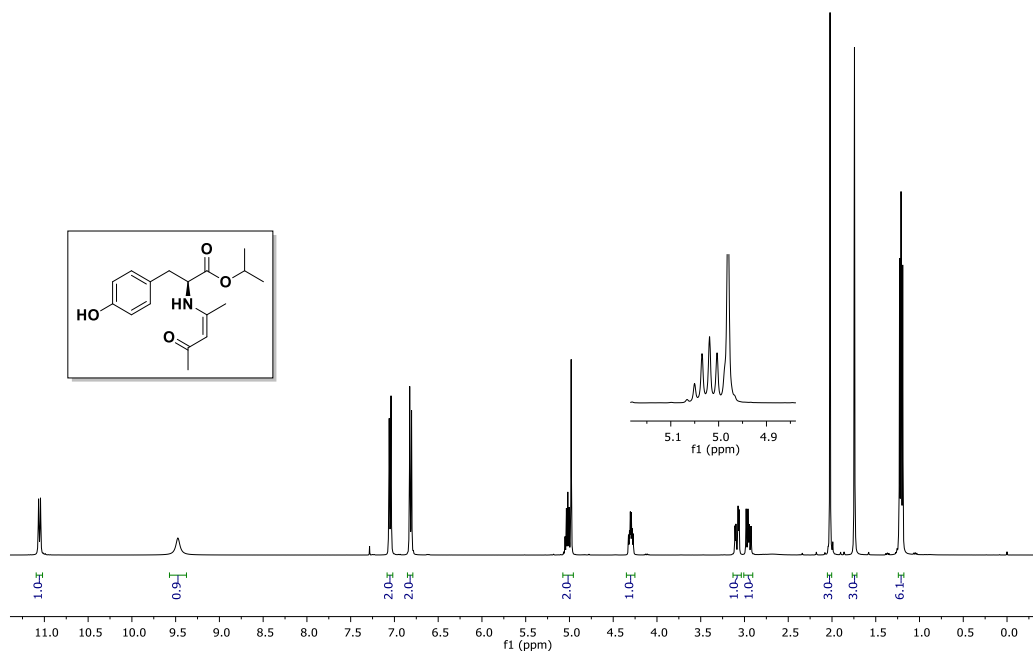

<sup>1</sup>H NMR spectrum of 11 in CDCl<sub>3</sub>.

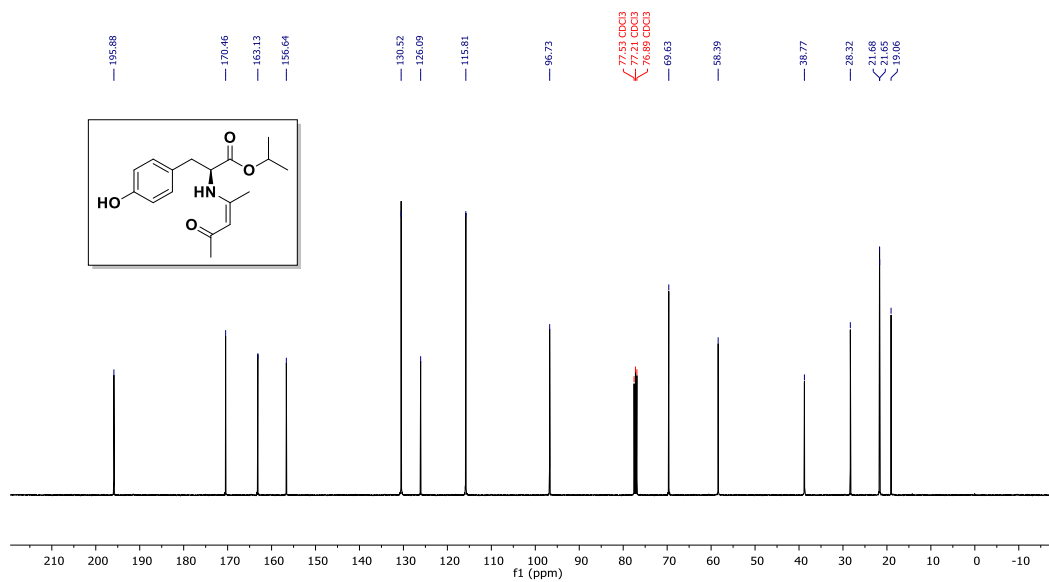

<sup>13</sup>C NMR spectrum of 11 in CDCl<sub>3</sub>.

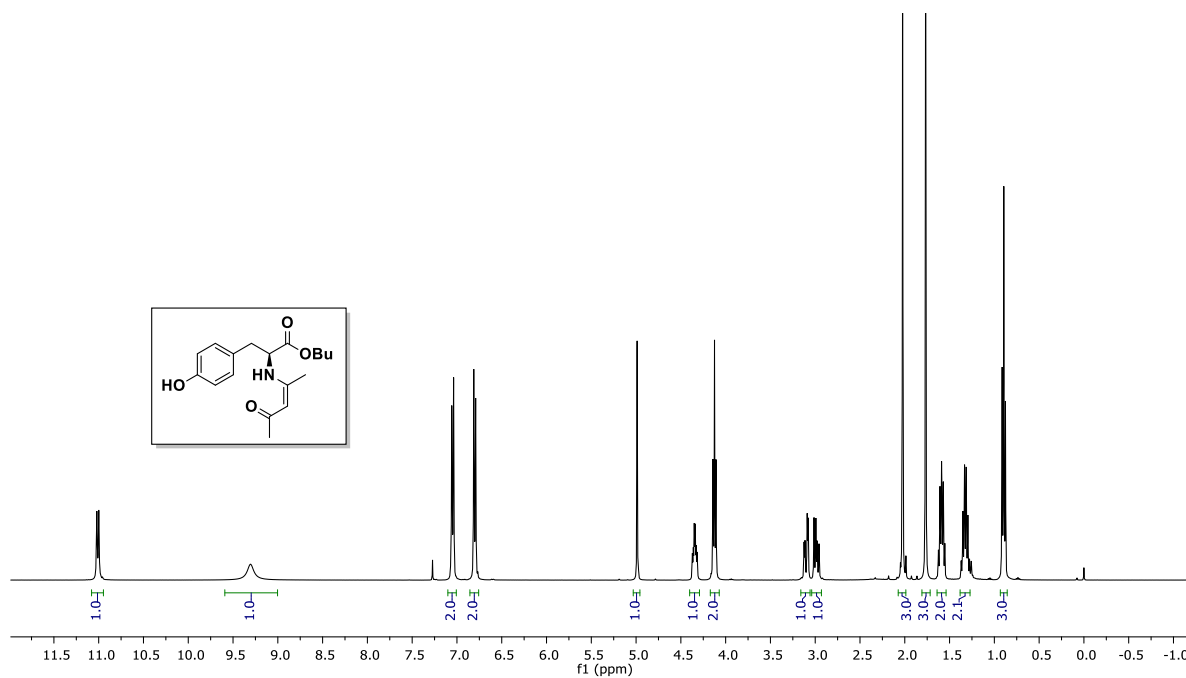

<sup>1</sup>H NMR spectrum of 12 in CDCl<sub>3</sub>.

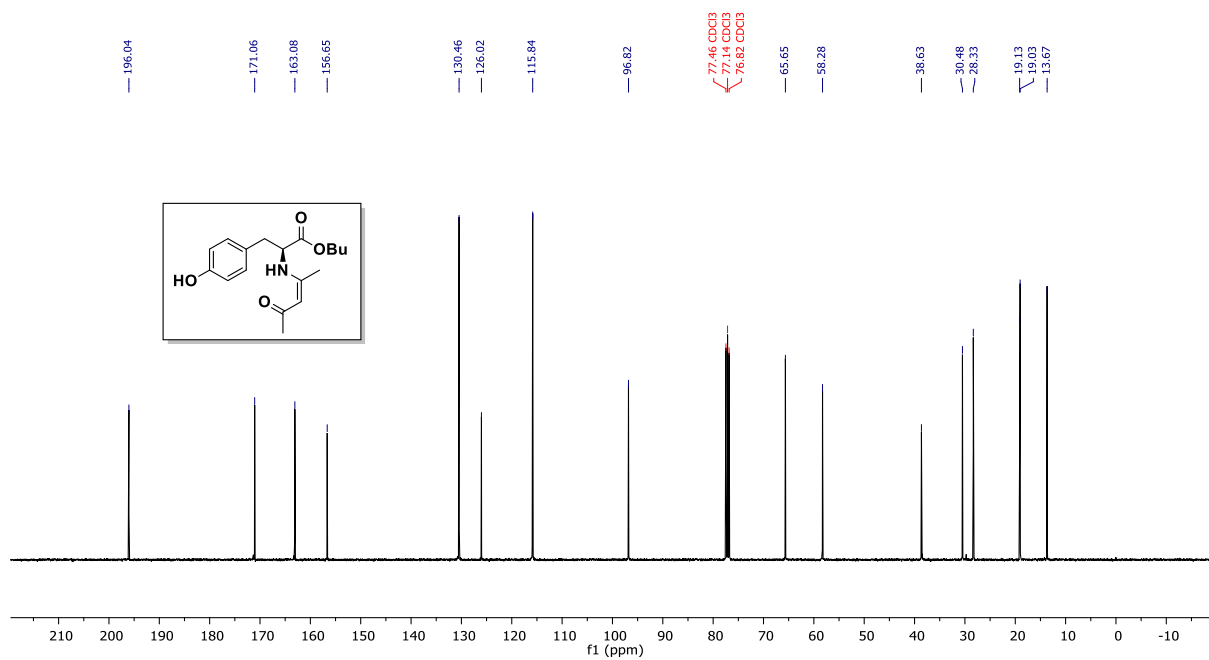

<sup>13</sup>C NMR spectrum of 12 in CDCl<sub>3</sub>.

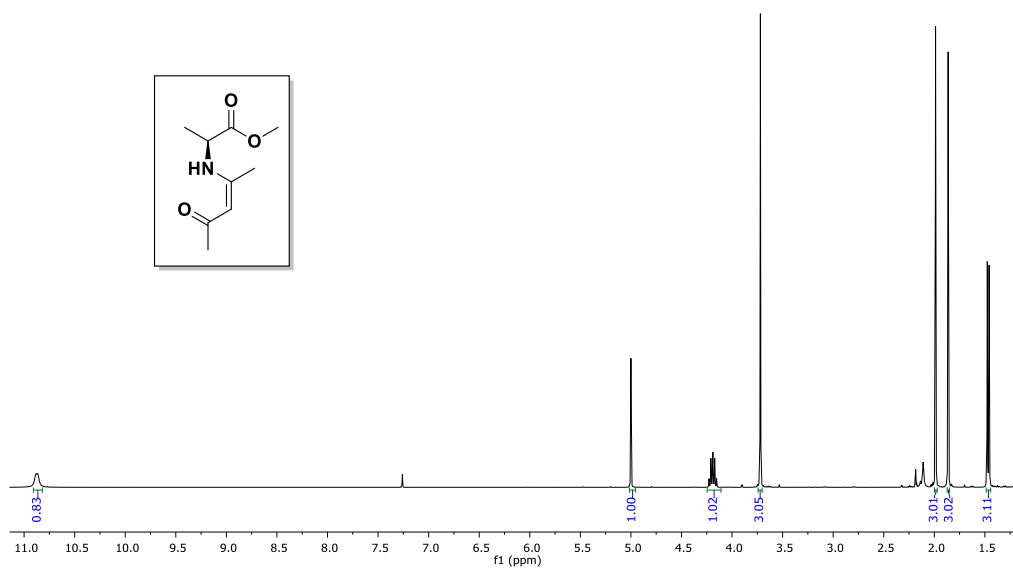

<sup>1</sup>H NMR spectrum of 13 in CDCl<sub>3</sub>.

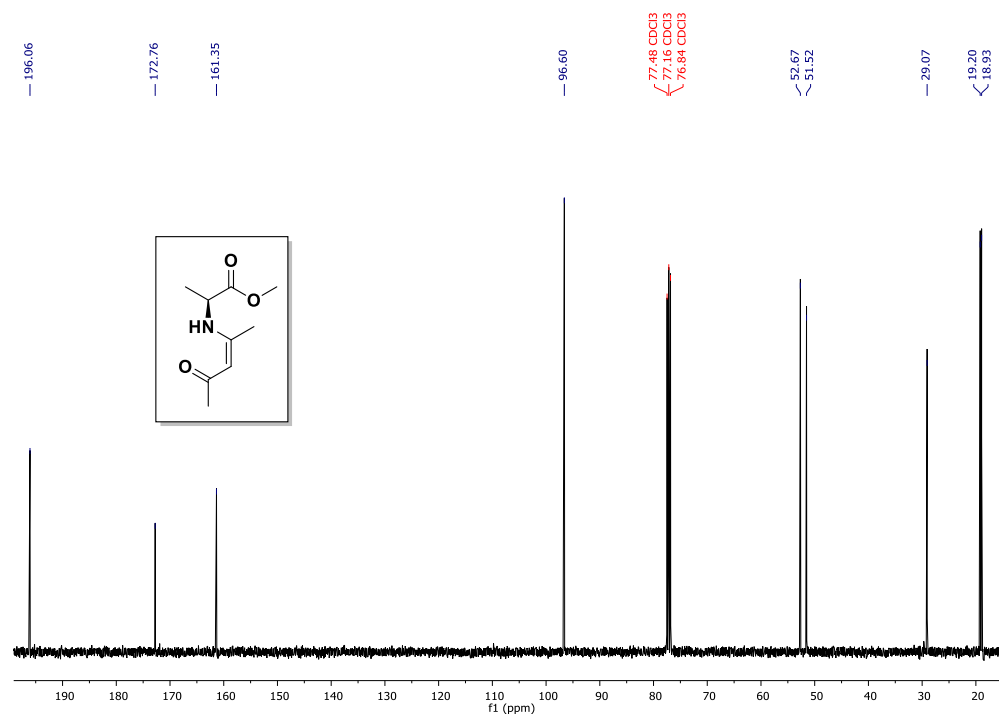

<sup>13</sup>C NMR spectrum of 13 in CDCl<sub>3</sub>.

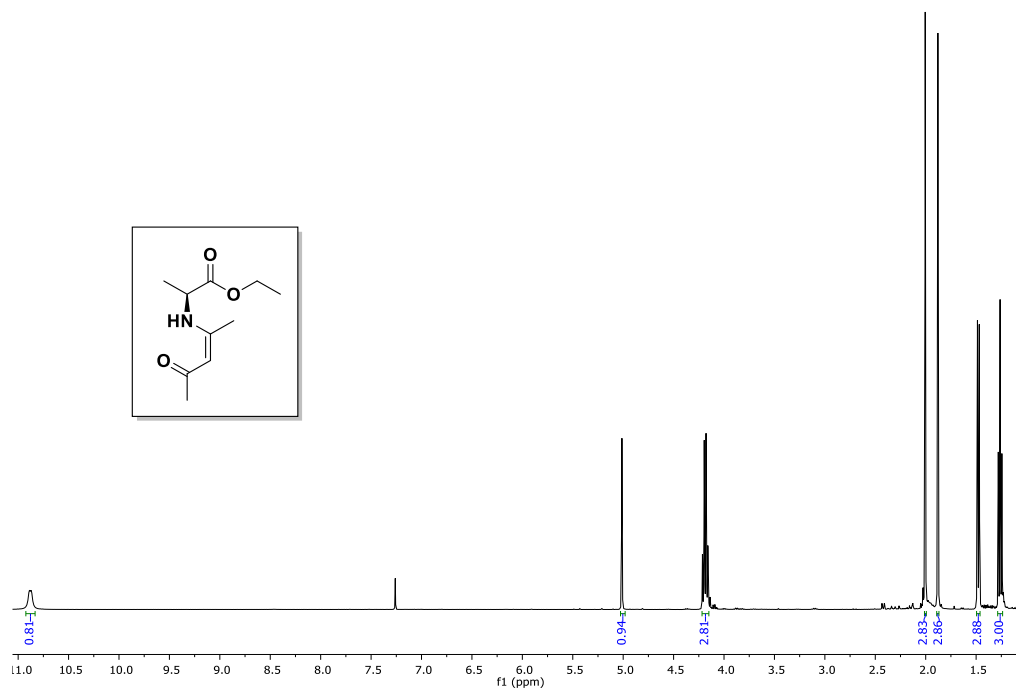

1H NMR spectrum of 14 in CDCl<sub>3</sub>.

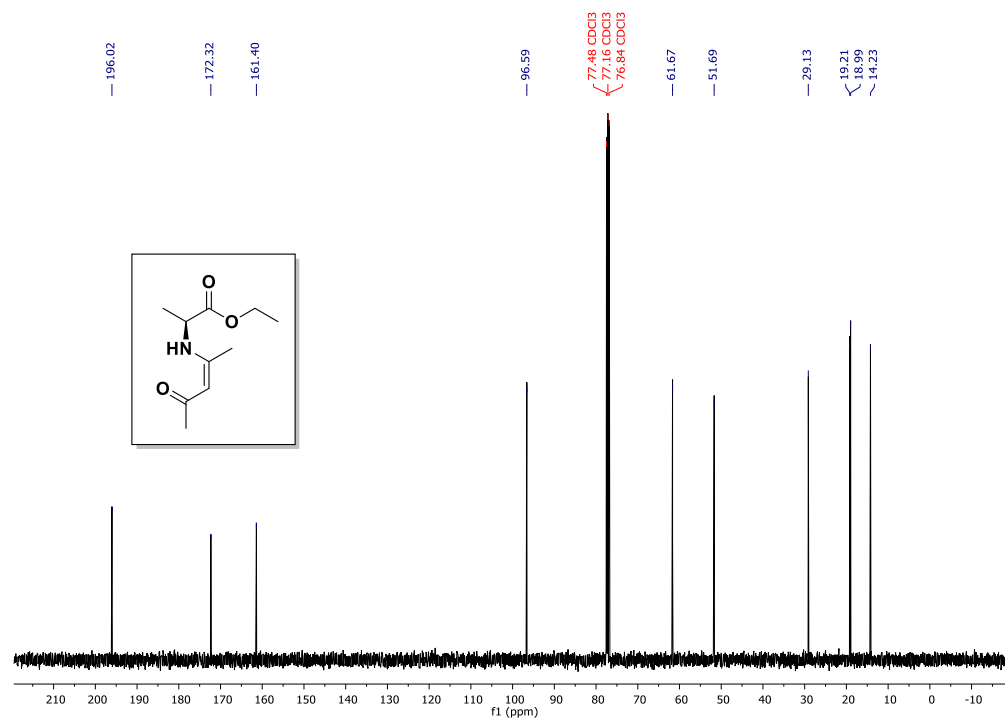

13C NMR spectrum of 14 in CDCl<sub>3</sub>.

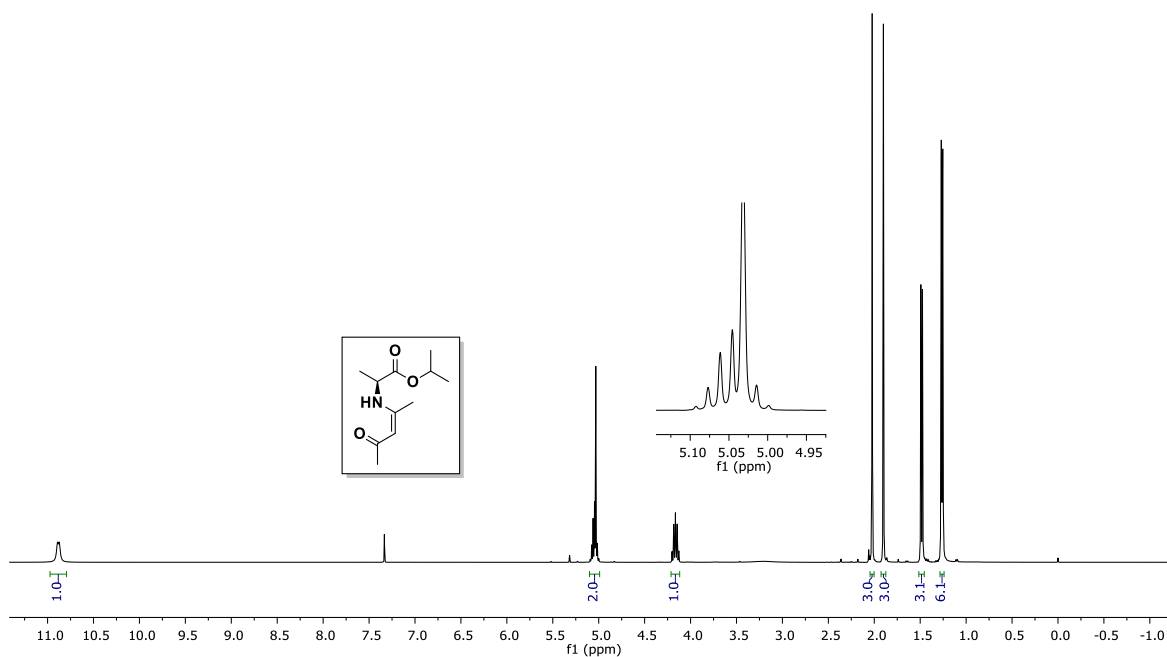

<sup>1</sup>H NMR spectrum of 15 in CDCl<sub>3</sub>.

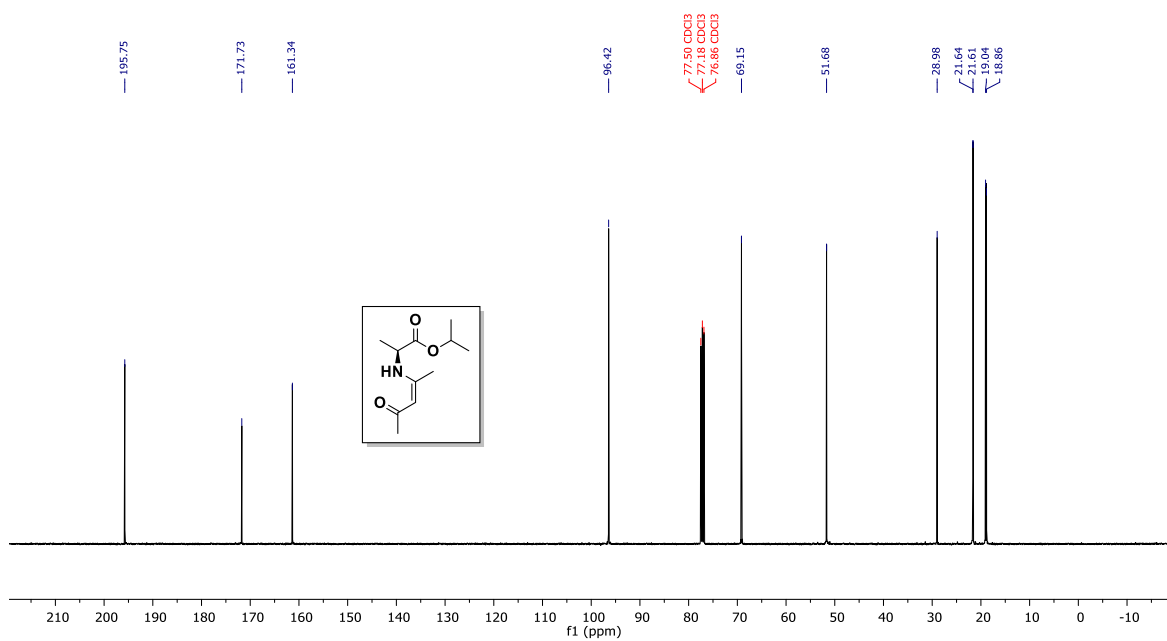

<sup>13</sup>C NMR spectrum of 15 in CDCl<sub>3</sub>.

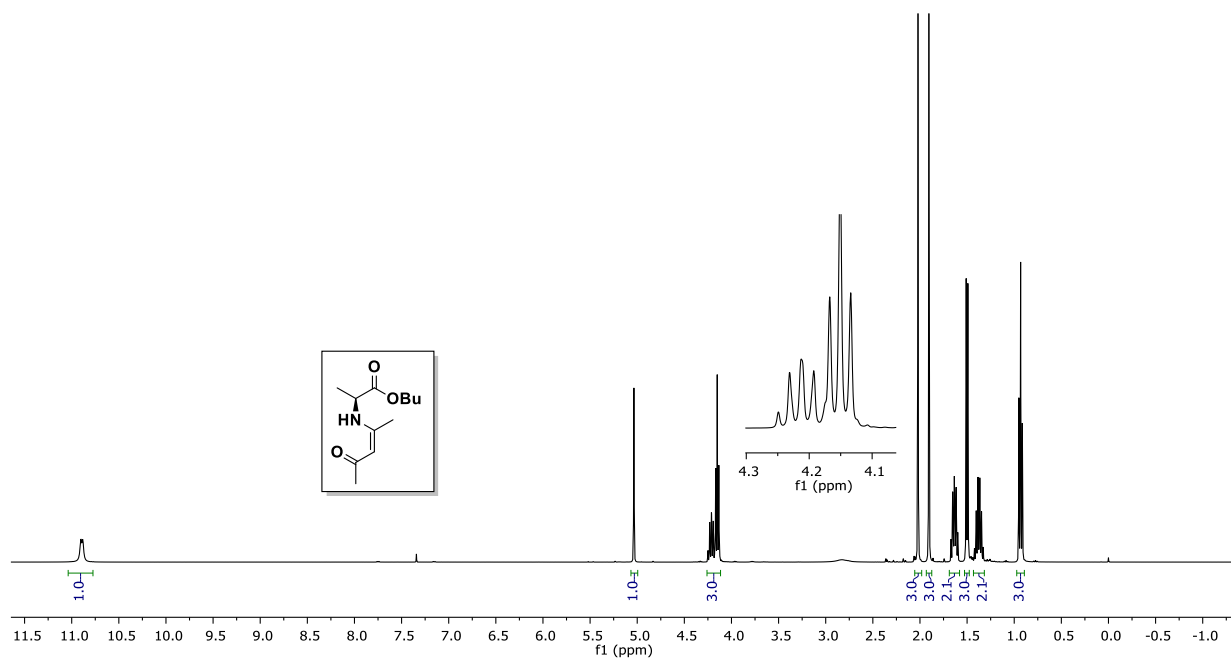

<sup>1</sup>H NMR spectrum of 16 in CDCl<sub>3</sub>.

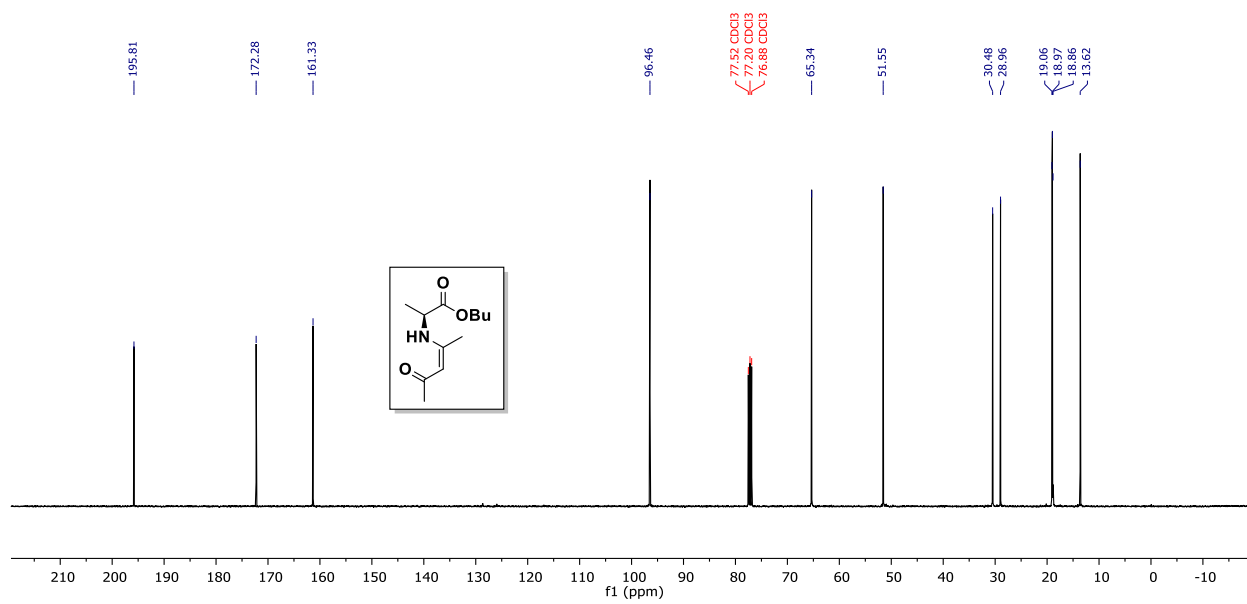

<sup>13</sup>C NMR spectrum of 16 in CDCl<sub>3</sub>.



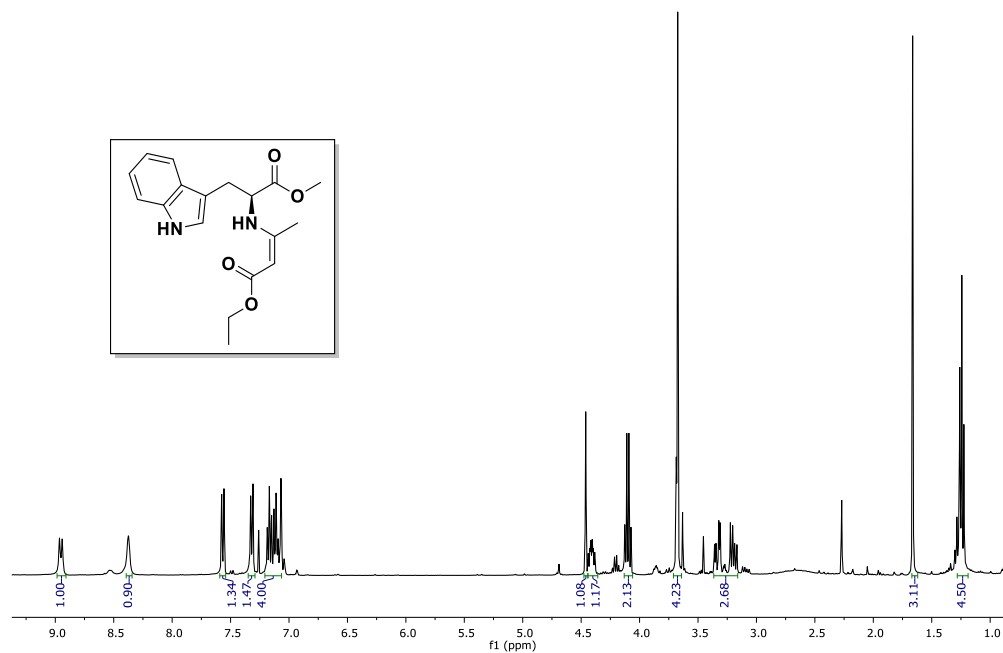

<sup>1</sup>H NMR spectrum of 17 in CDCl<sub>3</sub>.

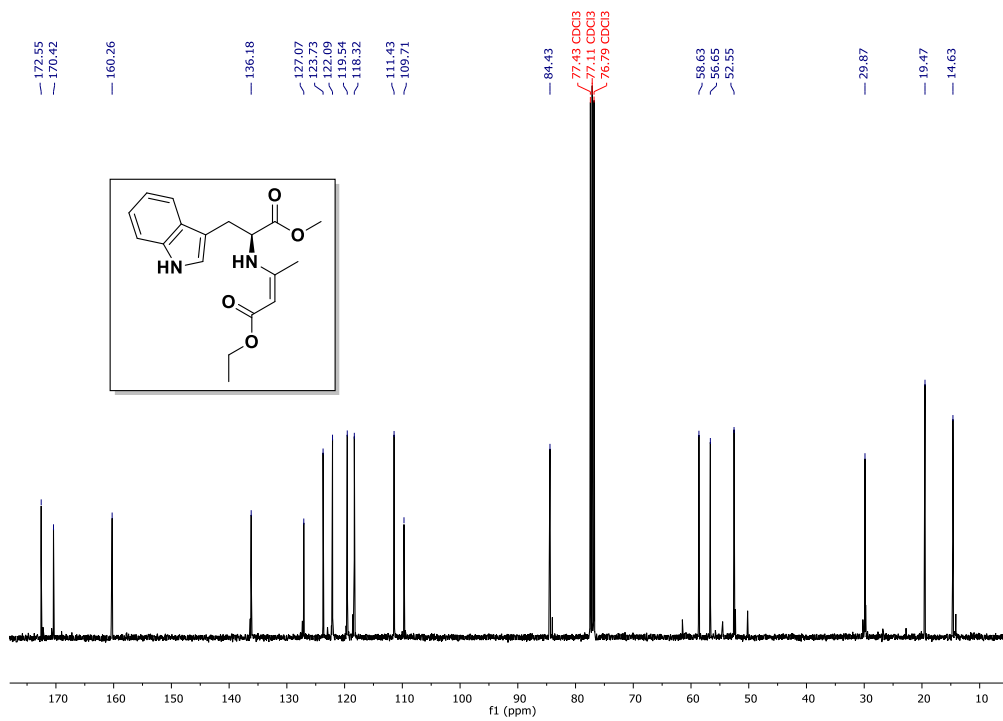

<sup>13</sup>C NMR spectrum of 17 in CDCl<sub>3</sub>.

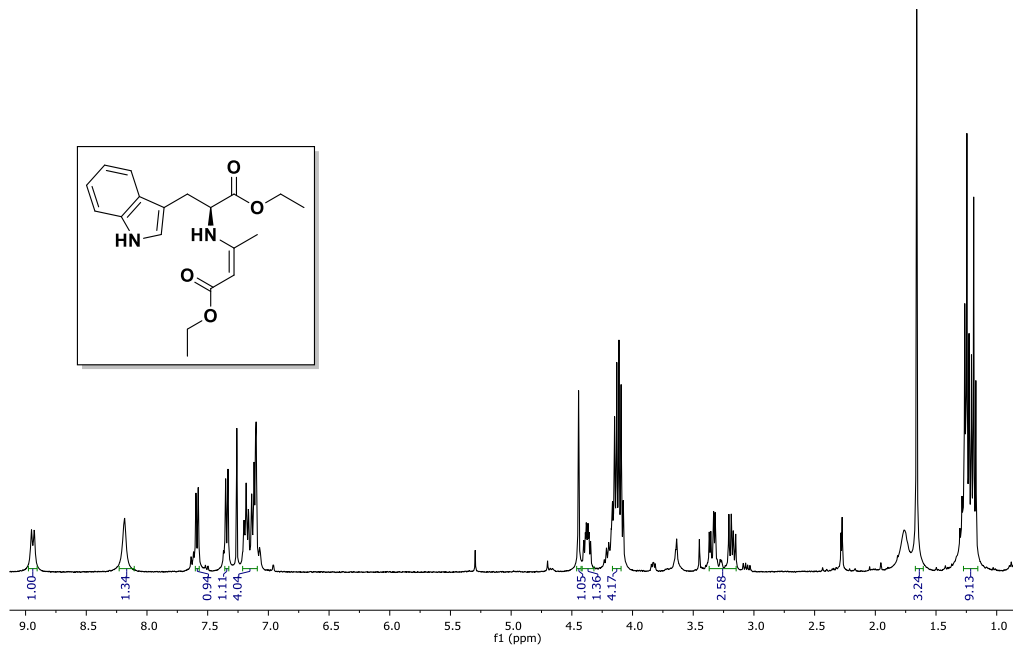

<sup>1</sup>H NMR spectrum of 18 in CDCl<sub>3</sub>.

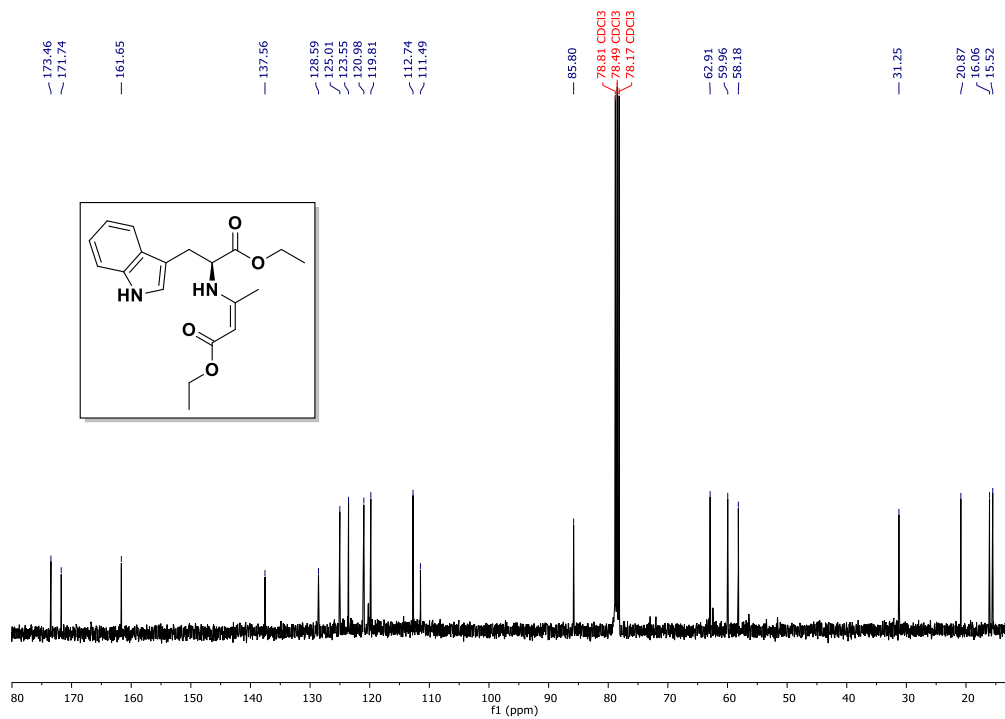

<sup>13</sup>C NMR spectrum of 18 in CDCl<sub>3</sub>.

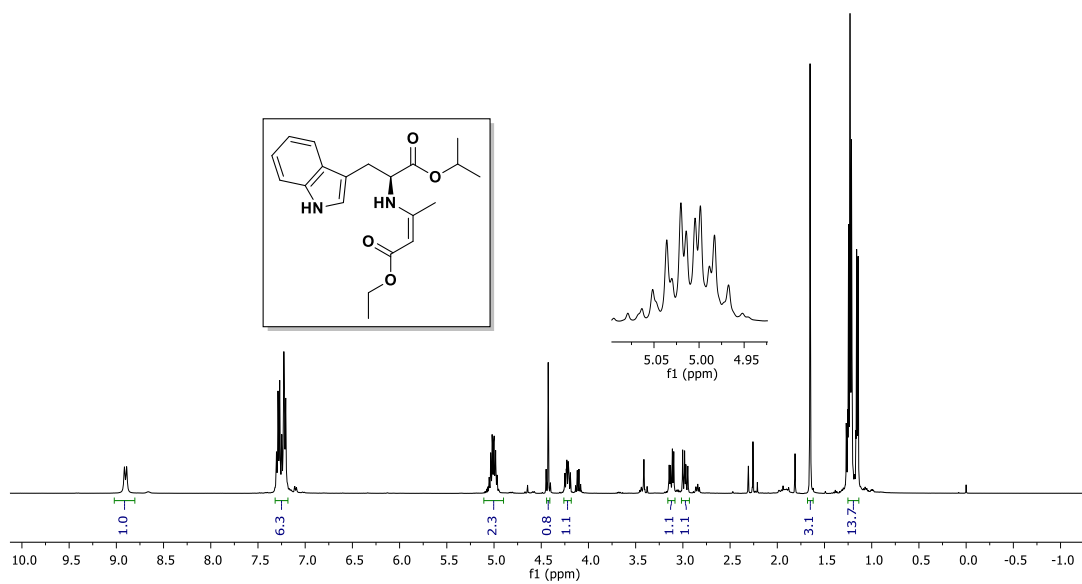

<sup>1</sup>H NMR spectrum of 19 in CDCl<sub>3</sub>.

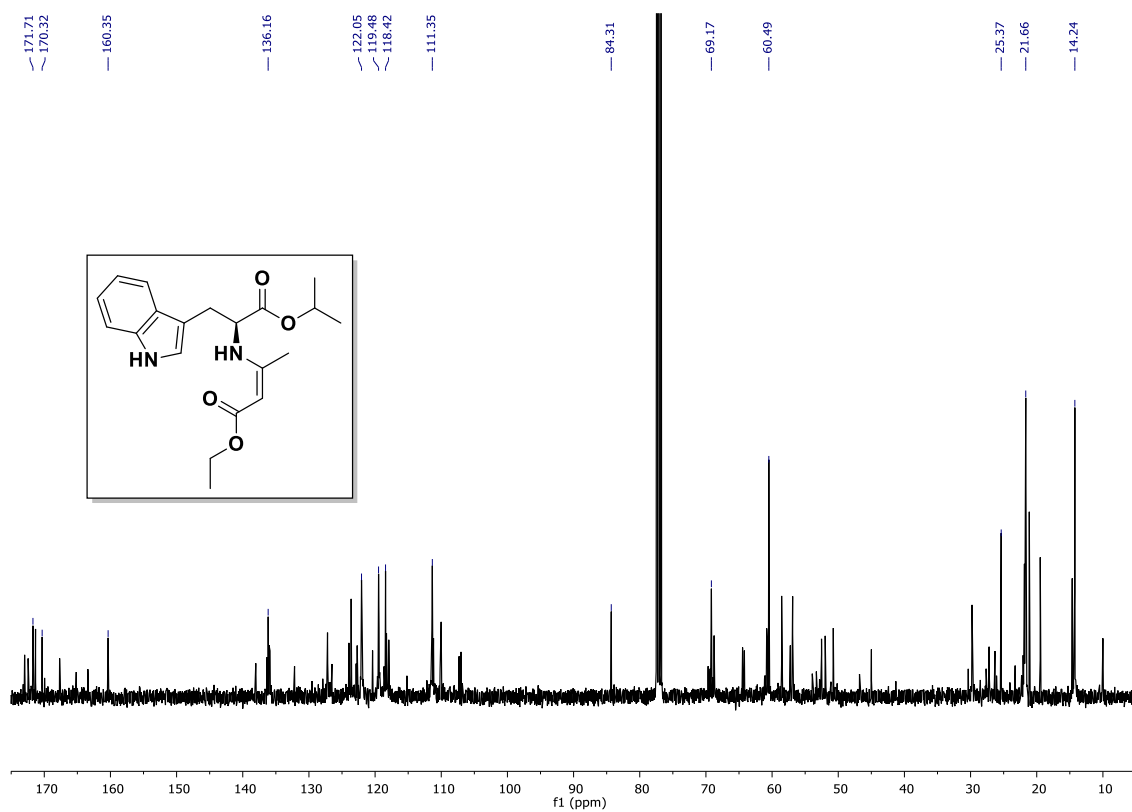

<sup>13</sup>C NMR spectrum of 19 in CDCl<sub>3</sub>.

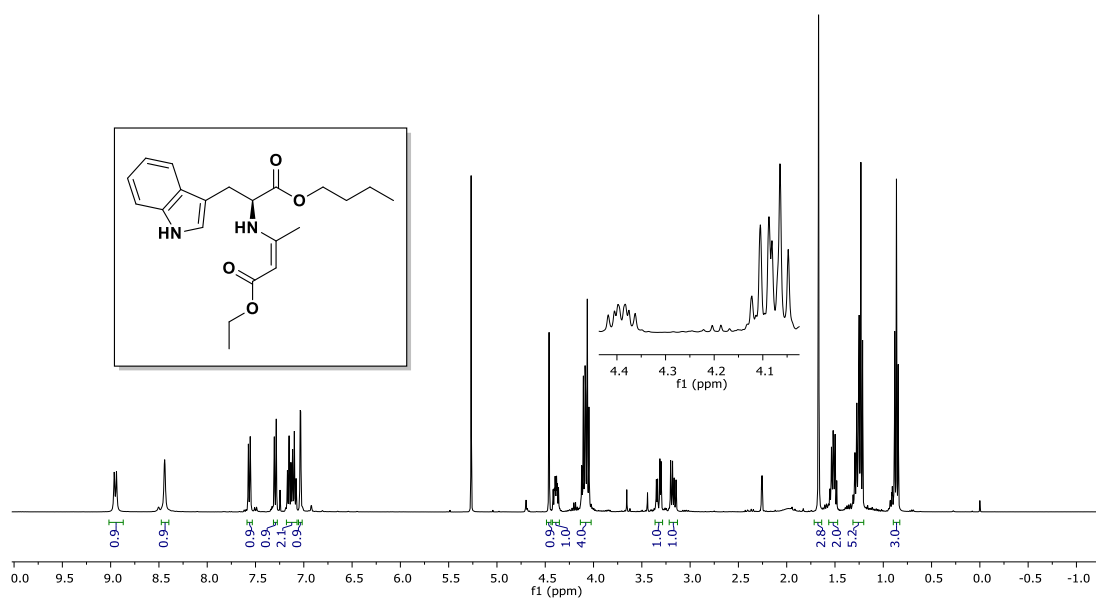

<sup>1</sup>H NMR spectrum of 20 in CDCl<sub>3</sub>.

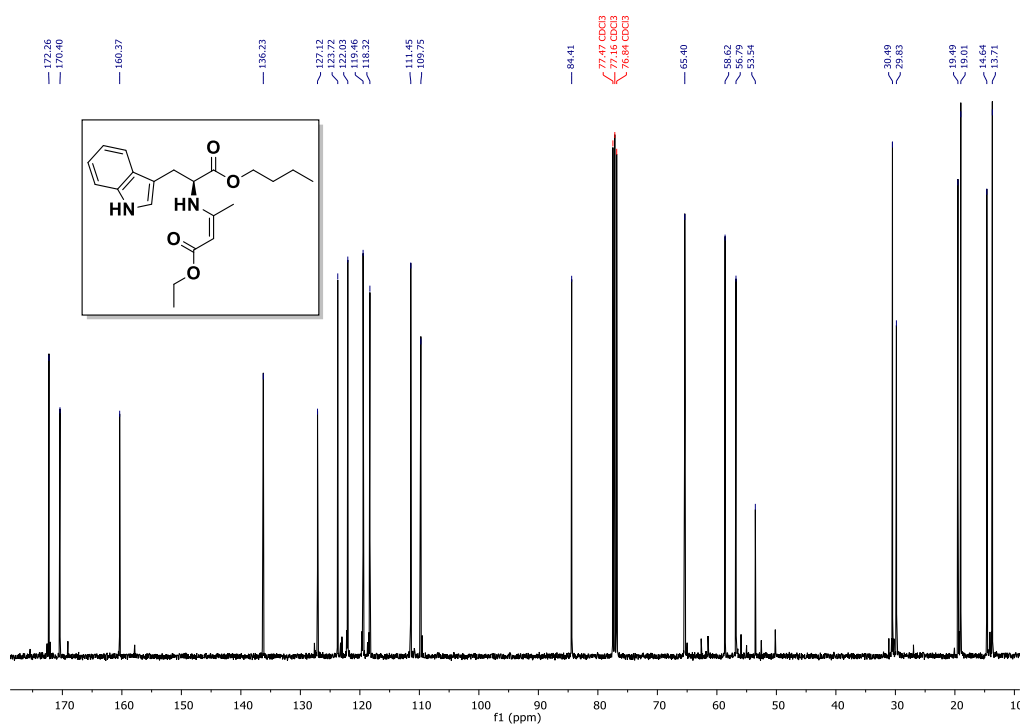

<sup>13</sup>C NMR spectrum of 20 in CDCl<sub>3</sub>.

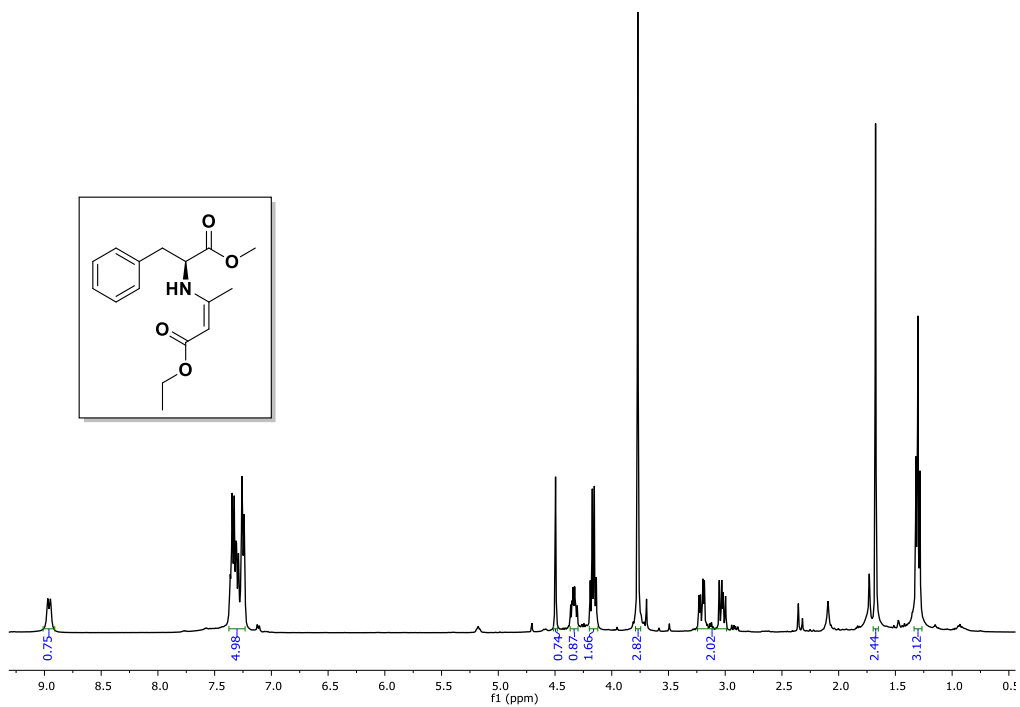

<sup>1</sup>H NMR spectrum of 21 in CDCl<sub>3</sub>.

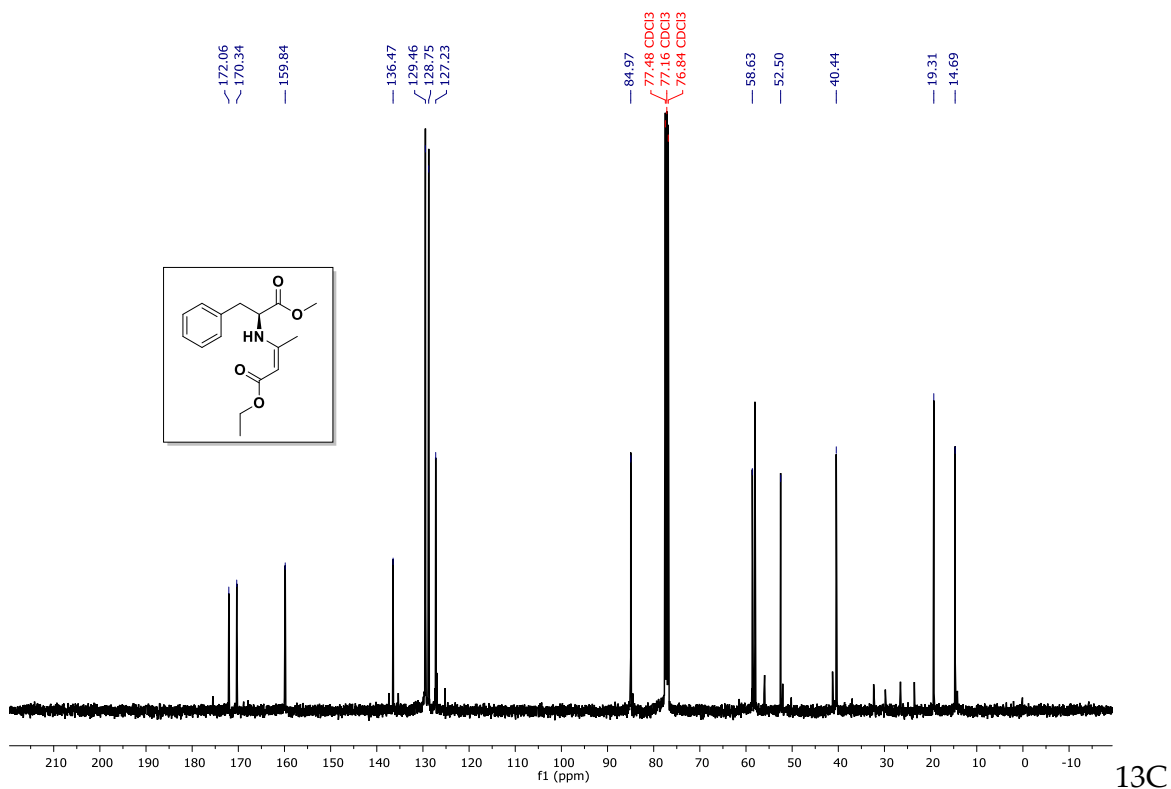

<sup>13</sup>C NMR spectrum of 21 in CDCl<sub>3</sub>.

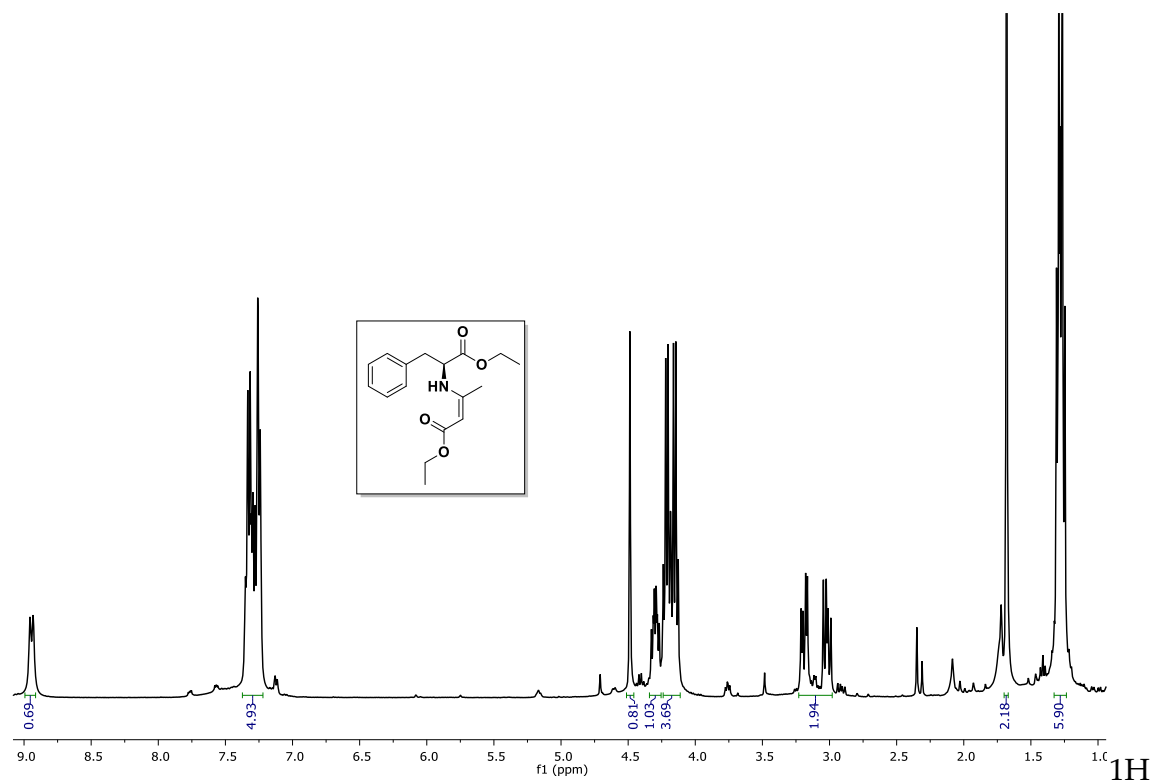

NMR spectrum of 22 in CDCl<sub>3</sub>.

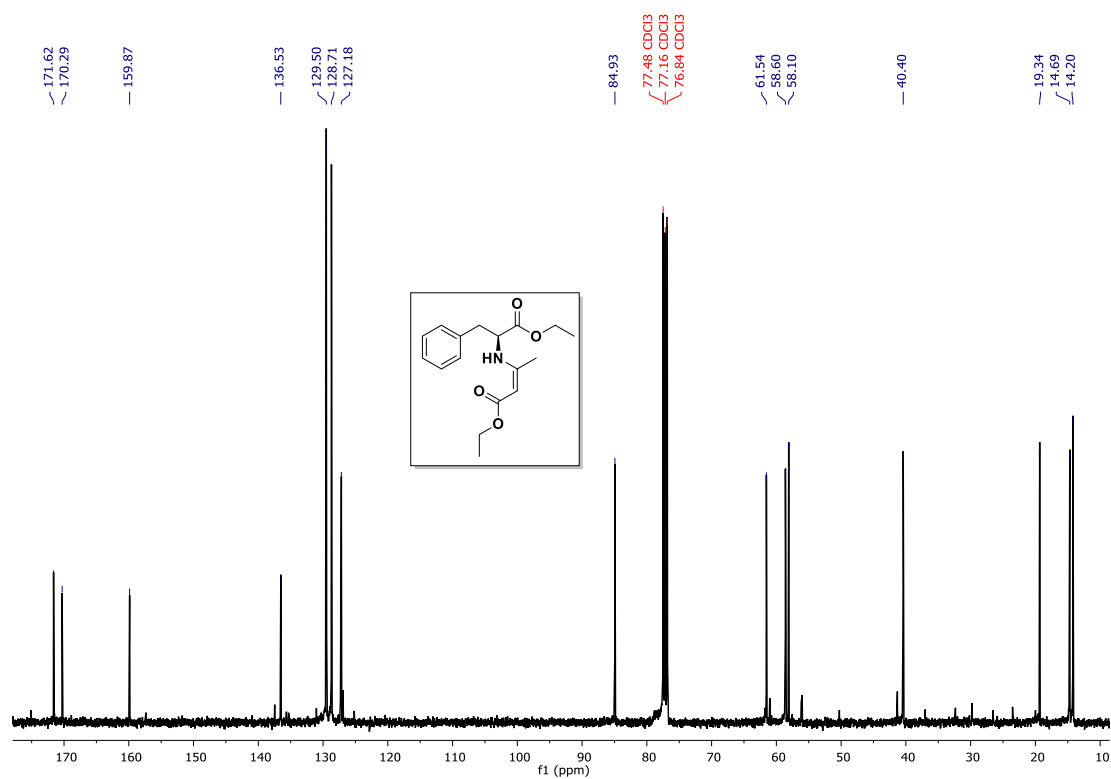

<sup>13</sup>C NMR spectrum of 22 in CDCl<sub>3</sub>.

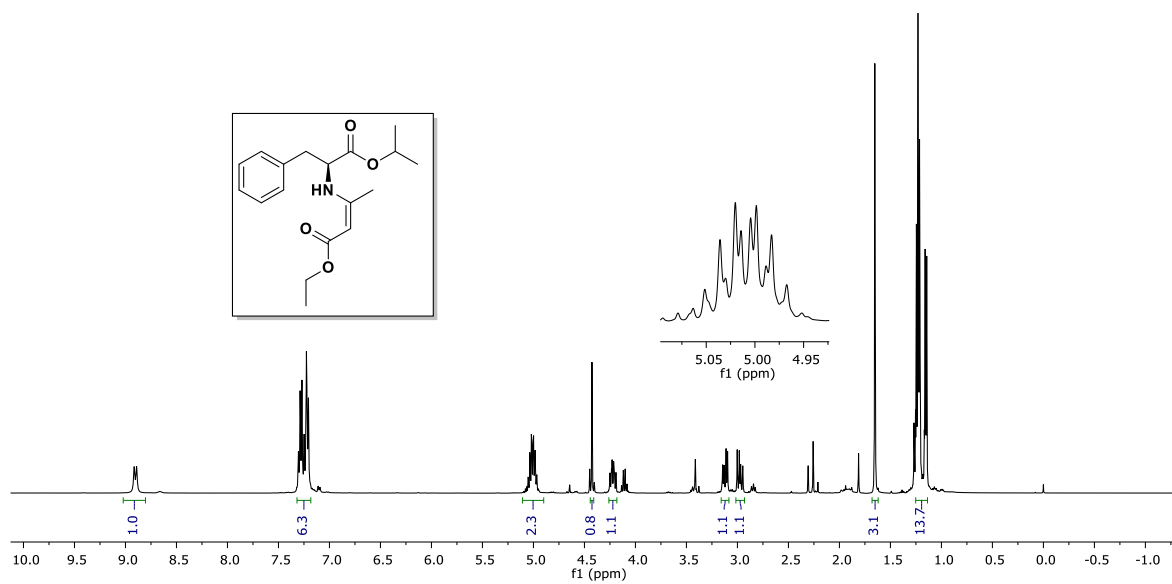

<sup>1</sup>H NMR spectrum of 23 in CDCl<sub>3</sub>.

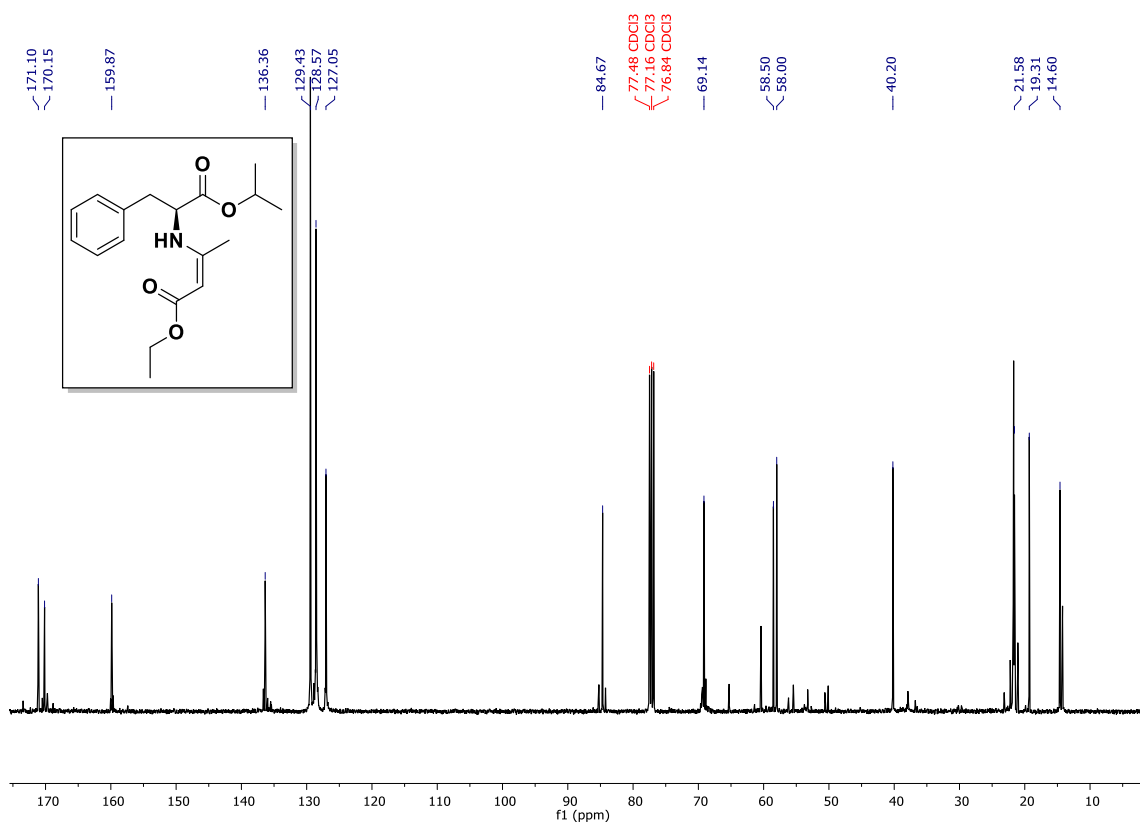

<sup>13</sup>C NMR spectrum of 23 in CDCl<sub>3</sub>.

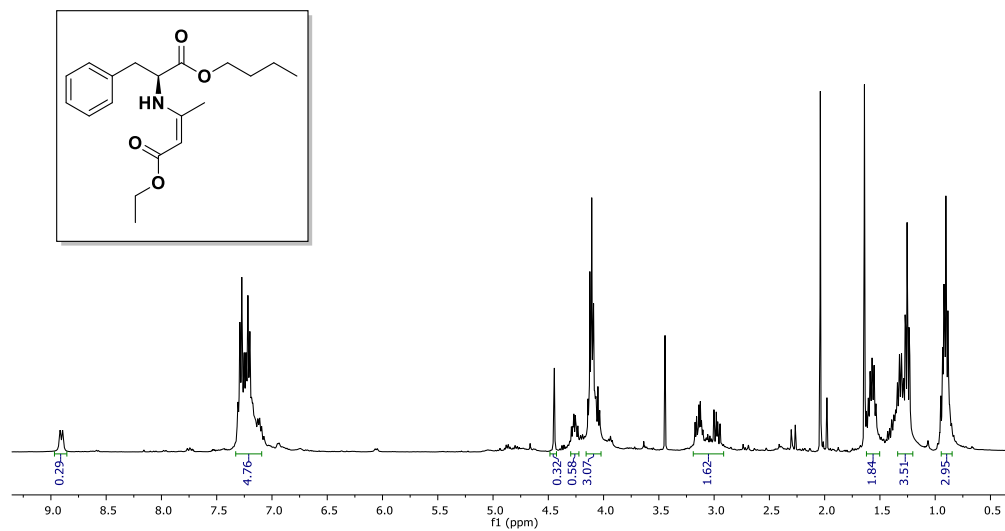

<sup>1</sup>H NMR spectrum of 24 in CDCl<sub>3</sub>.

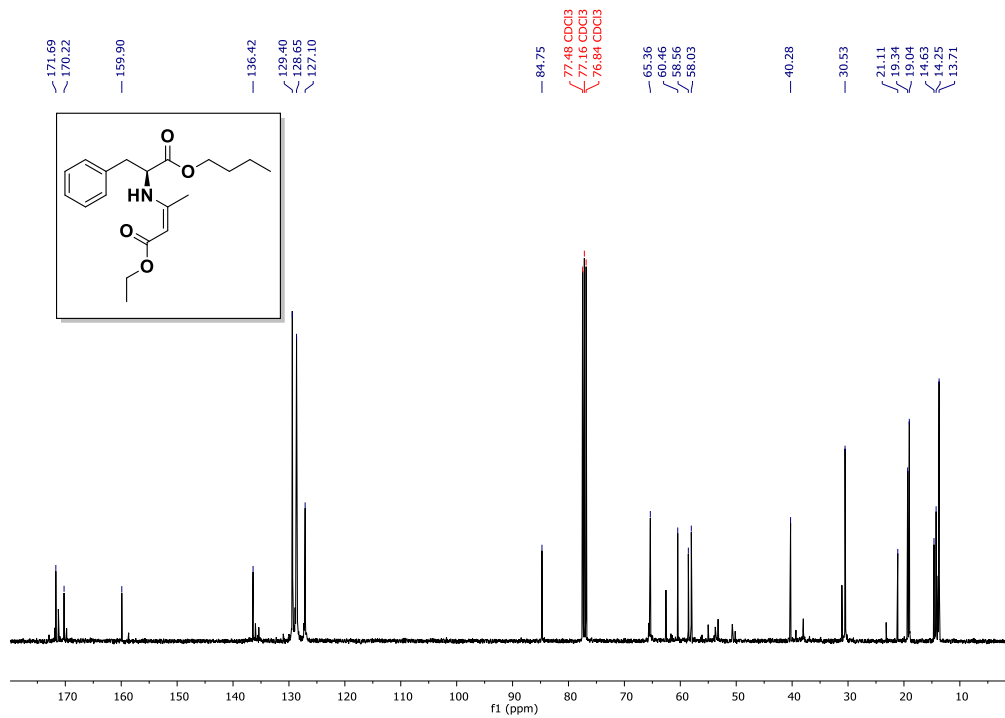

<sup>13</sup>C NMR spectrum of 24 in CDCl<sub>3</sub>.



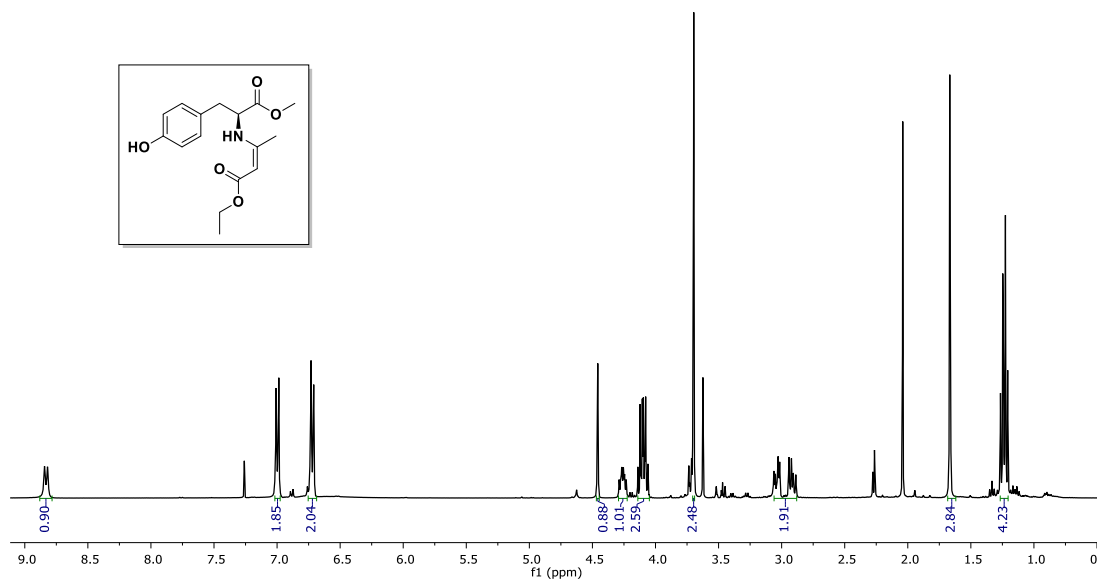

<sup>1</sup>H NMR spectrum of 25 in CDCl<sub>3</sub>.

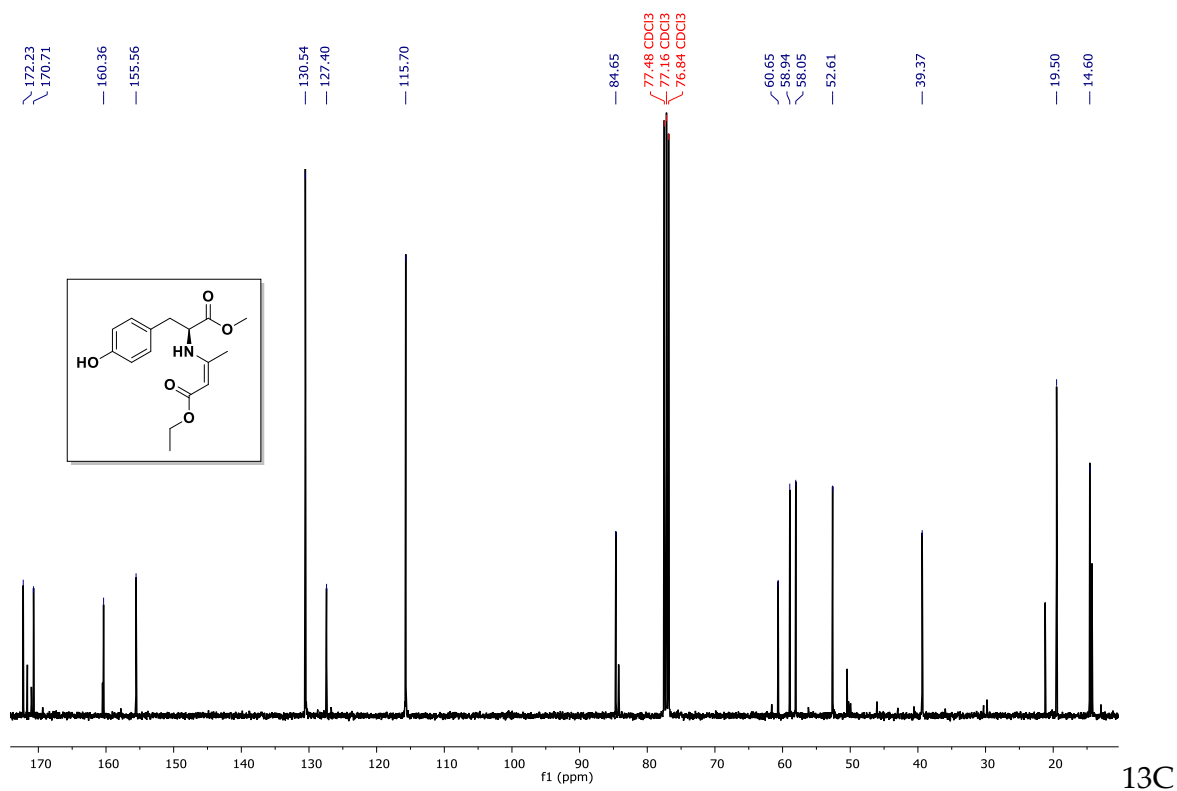

<sup>13</sup>C NMR spectrum of 25 in CDCl<sub>3</sub>.

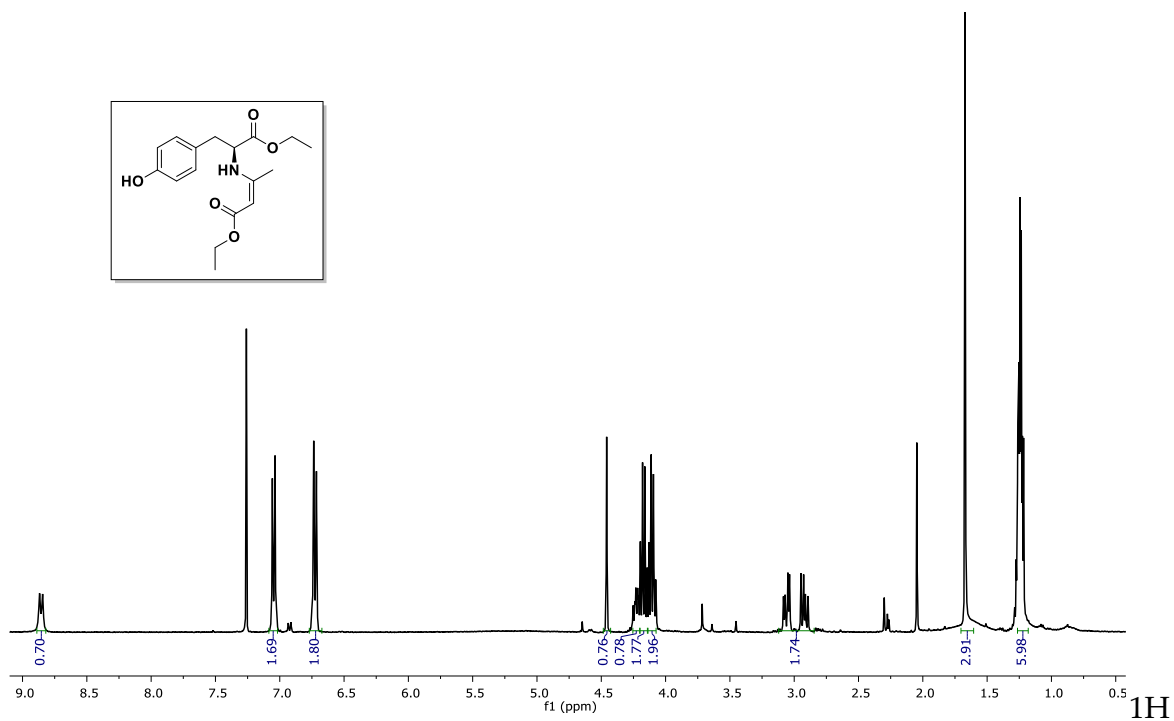

NMR spectrum of 26 in CDCl<sub>3</sub>.

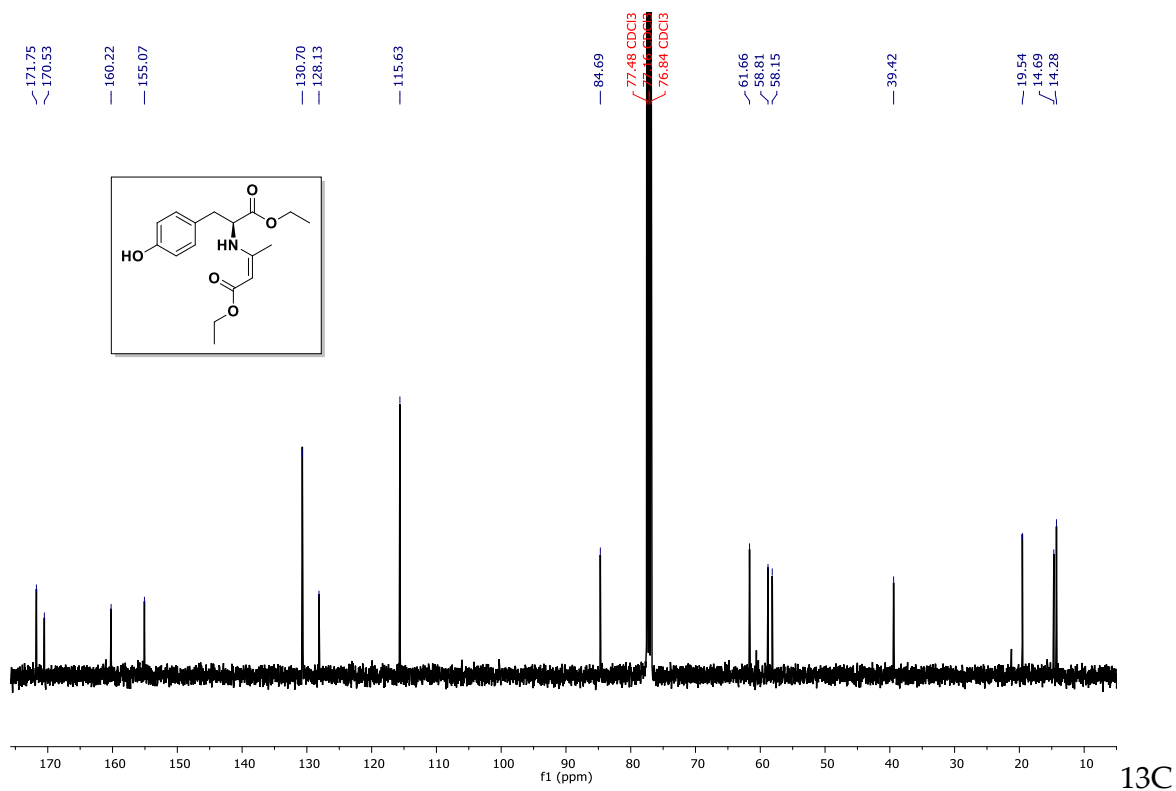

NMR spectrum of 26 in CDCl<sub>3</sub>.

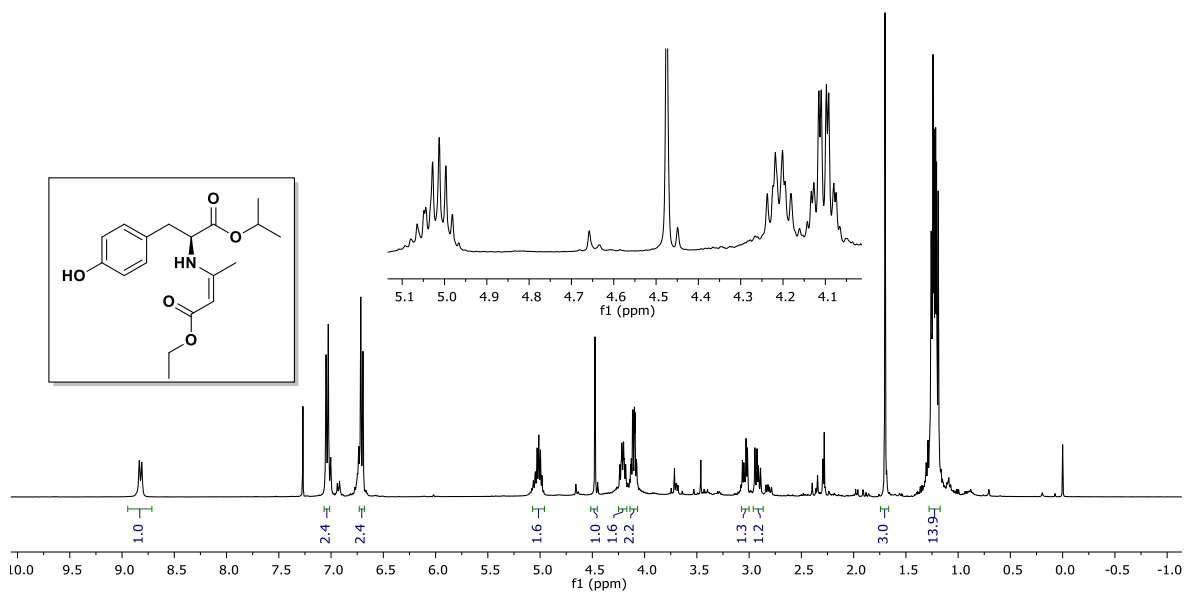

<sup>1</sup>H NMR spectrum of 27 in CDCl<sub>3</sub>.

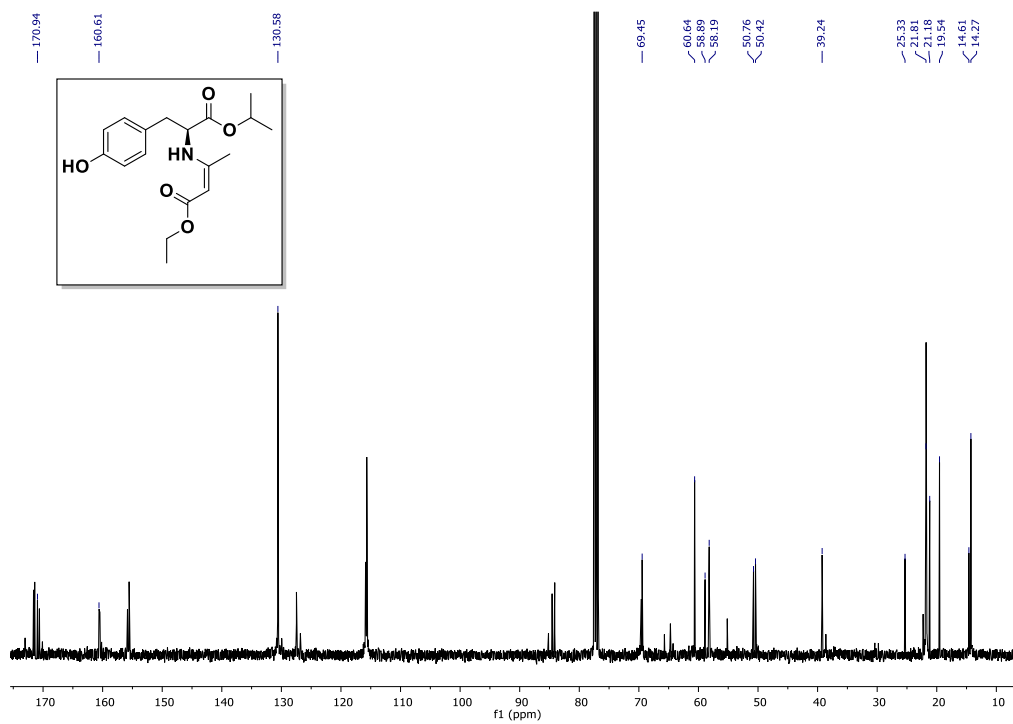

<sup>13</sup>C NMR spectrum of 27 in CDCl<sub>3</sub>.

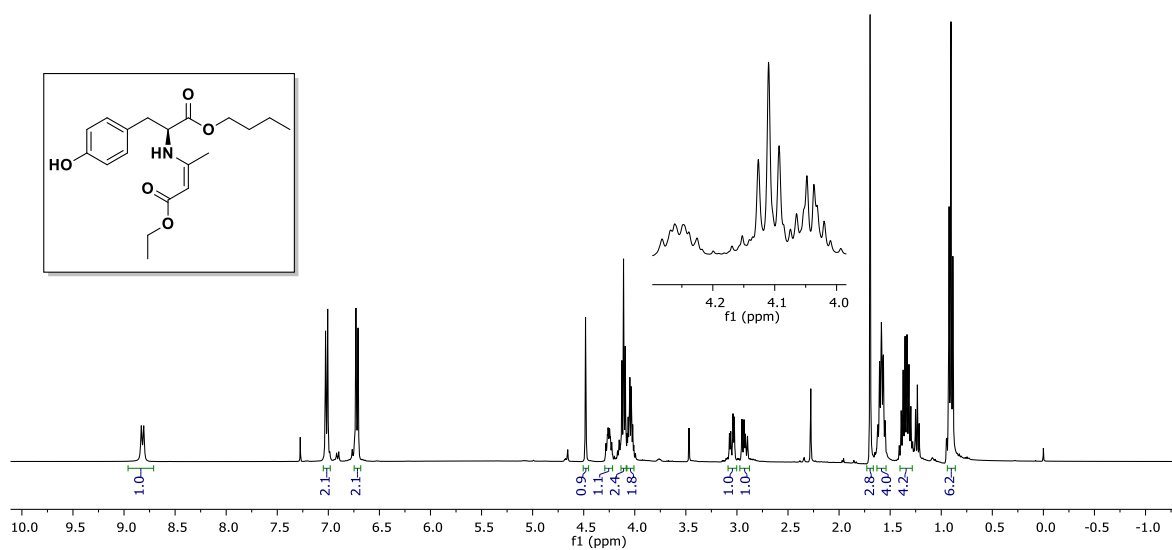

<sup>1</sup>H NMR spectrum of 28 in CDCl<sub>3</sub>.

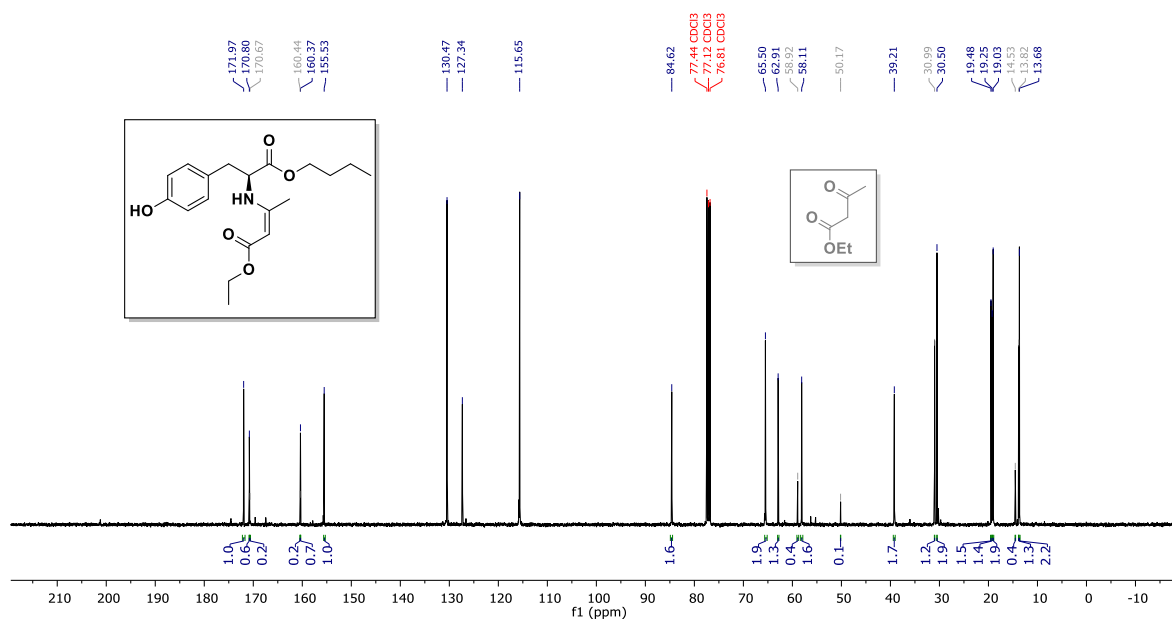

<sup>13</sup>C NMR spectrum of 28 in CDCl<sub>3</sub>.

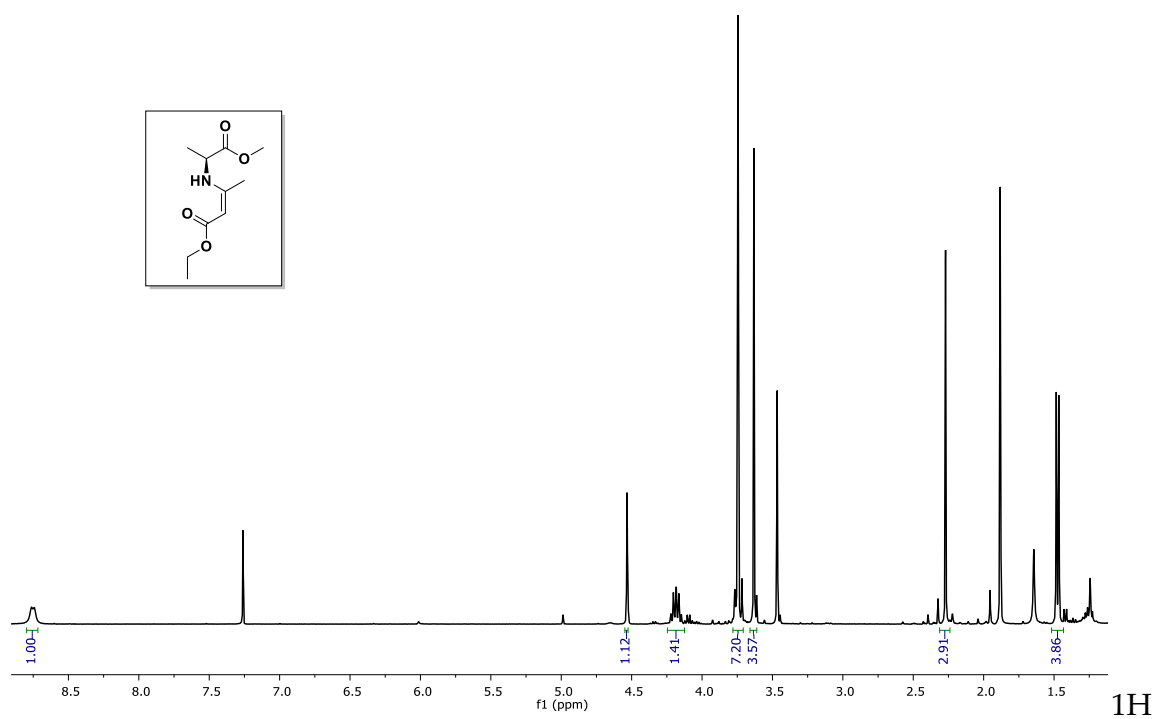

<sup>1</sup>H NMR spectrum of 29 in CDCl<sub>3</sub>.

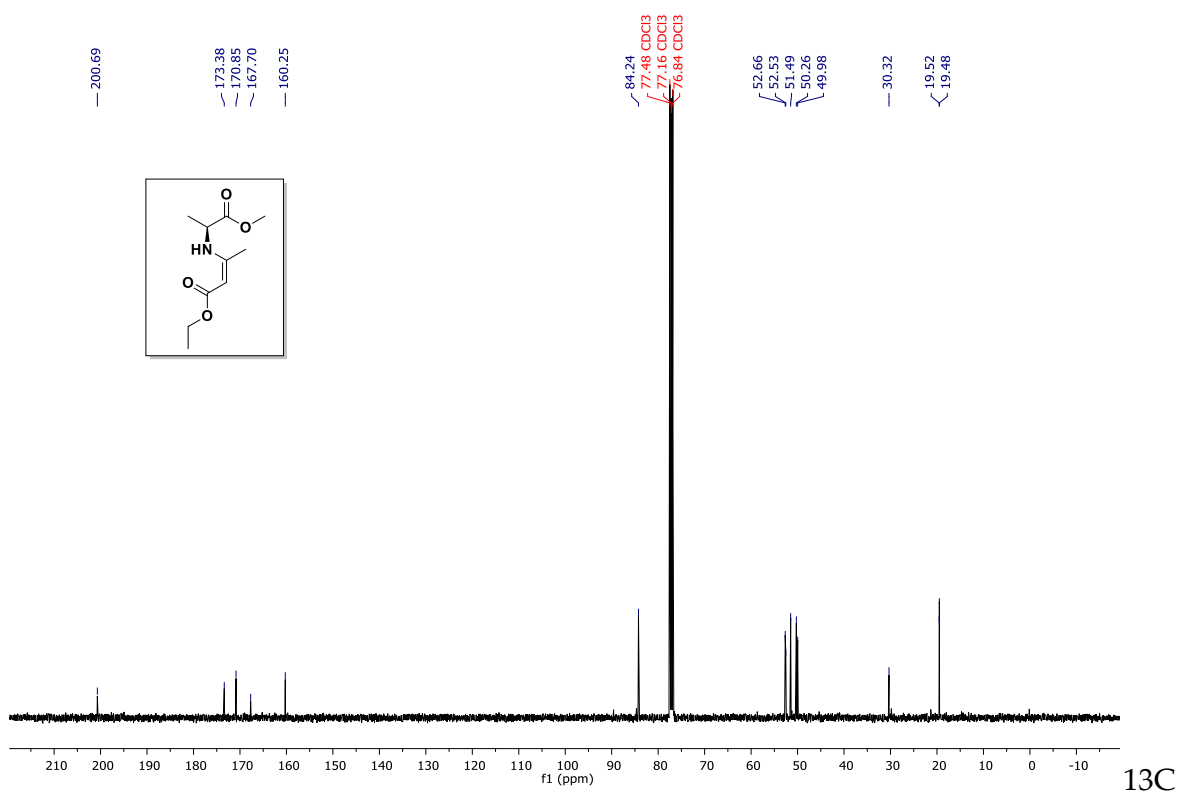

<sup>13</sup>C NMR spectrum of 29 in CDCl<sub>3</sub>.

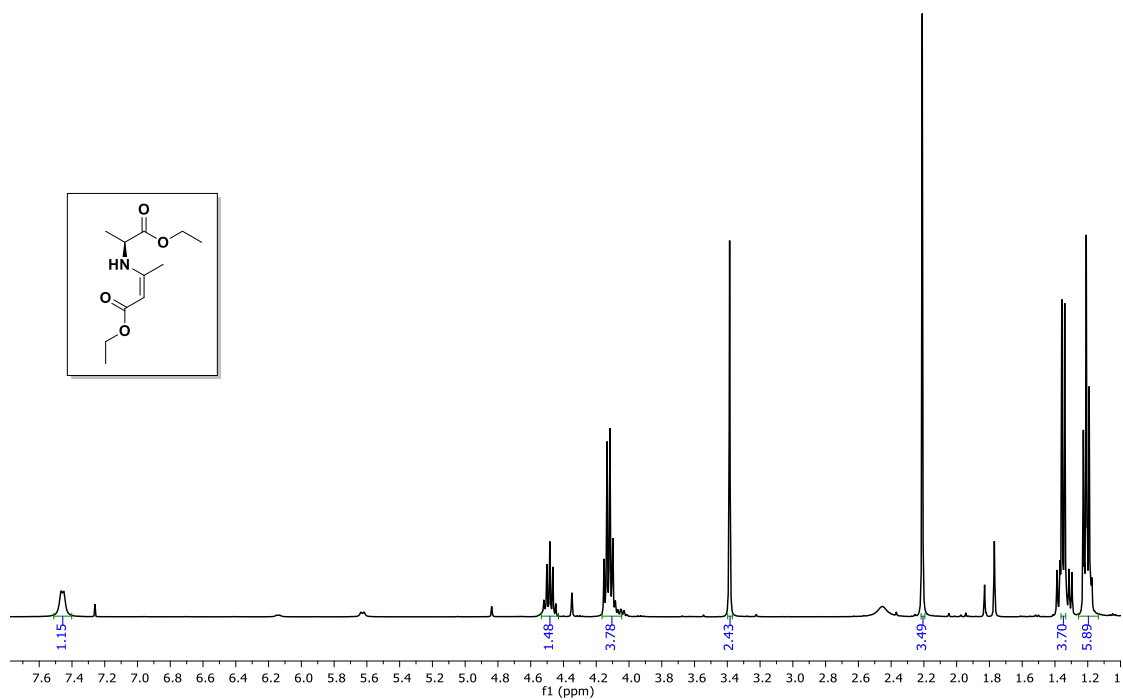

<sup>1</sup>H NMR spectrum of 30 in CDCl<sub>3</sub>.

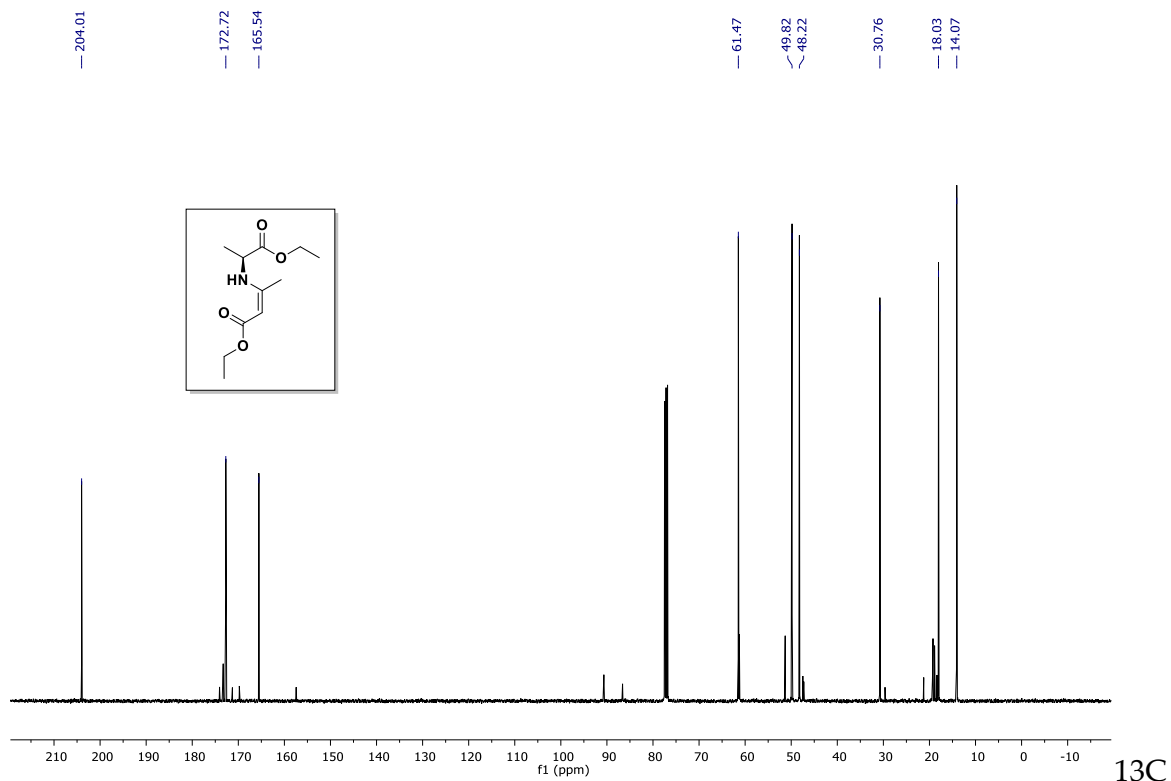

<sup>13</sup>C NMR spectrum of 30 in CDCl<sub>3</sub>.

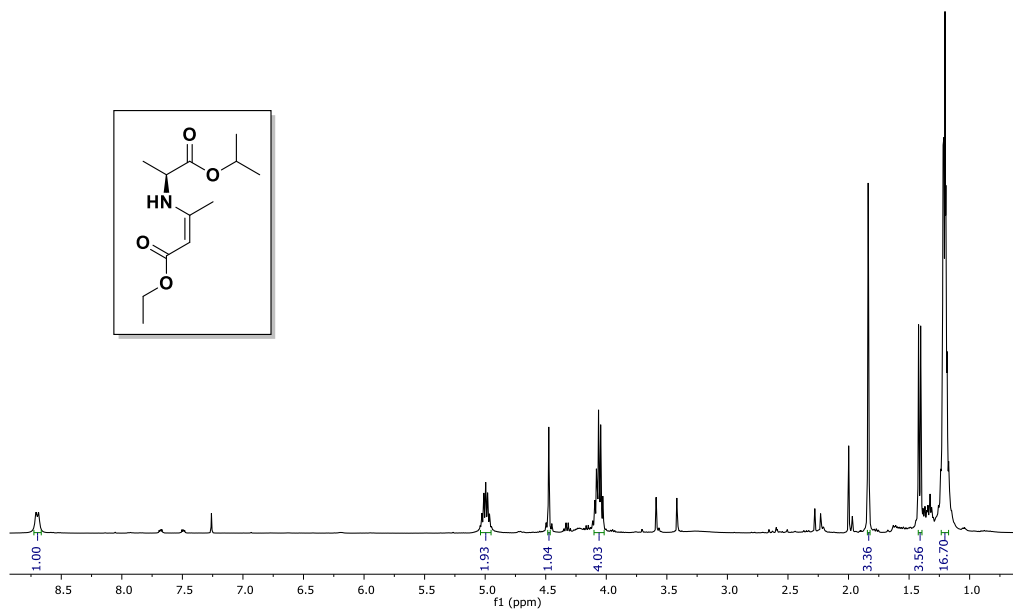

<sup>1</sup>H NMR spectrum of 31 in CDCl<sub>3</sub>.

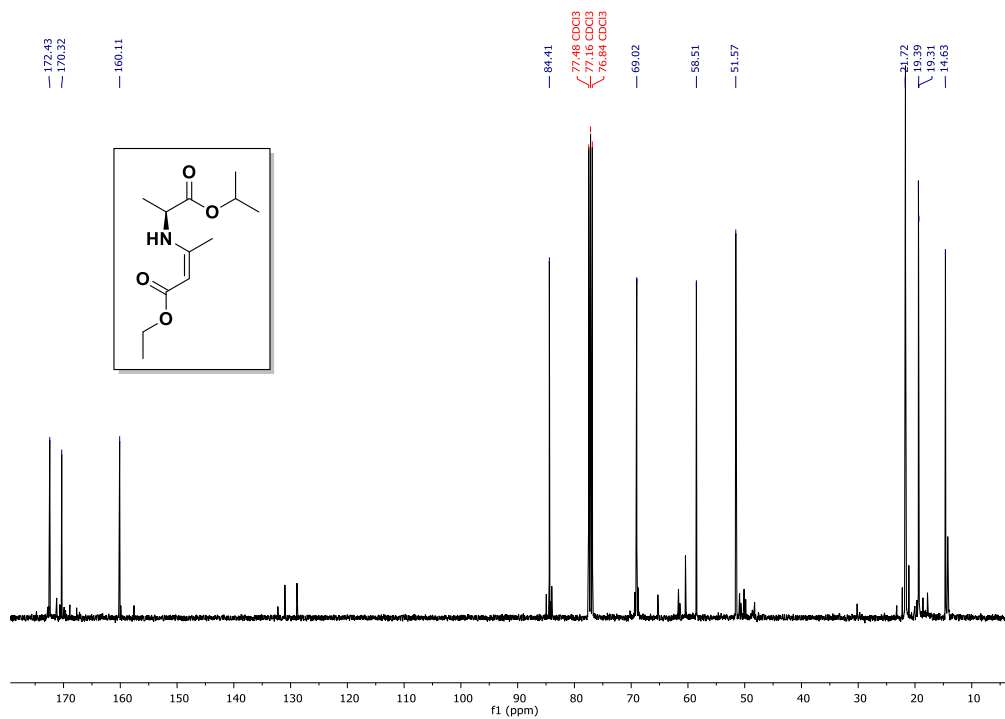

<sup>13</sup>C NMR spectrum of 31 in CDCl<sub>3</sub>.

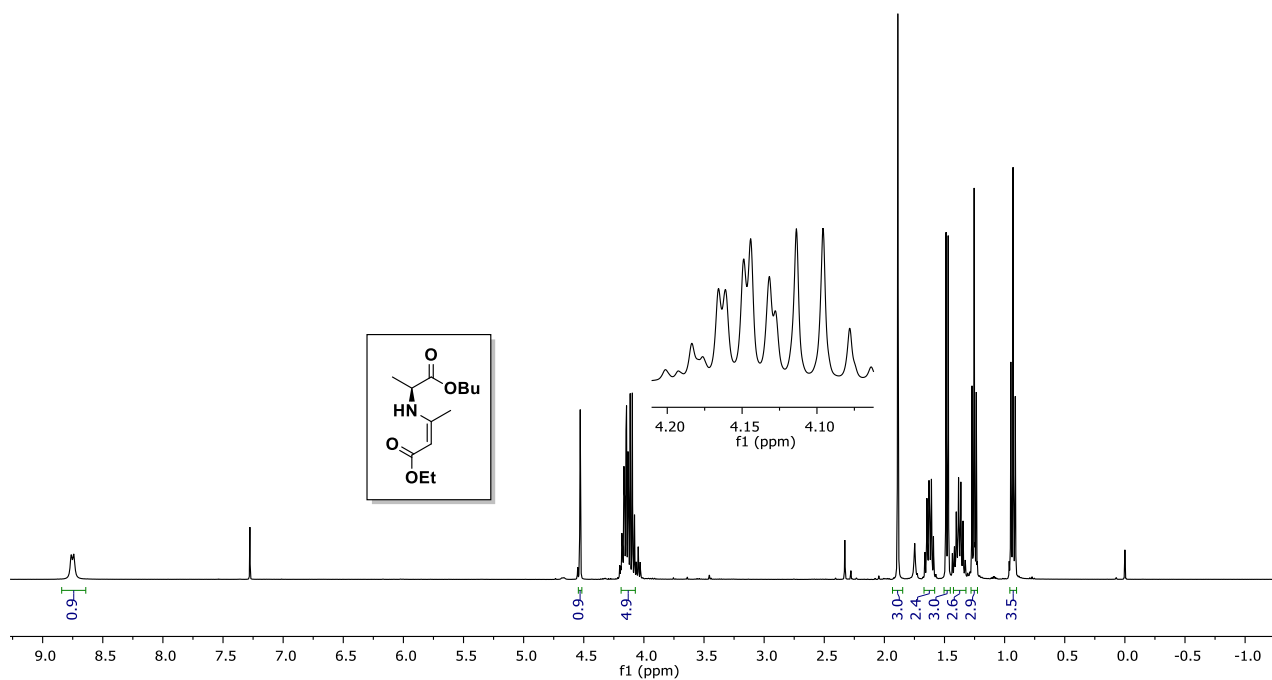

<sup>1</sup>H NMR spectrum of 32 in CDCl<sub>3</sub>.

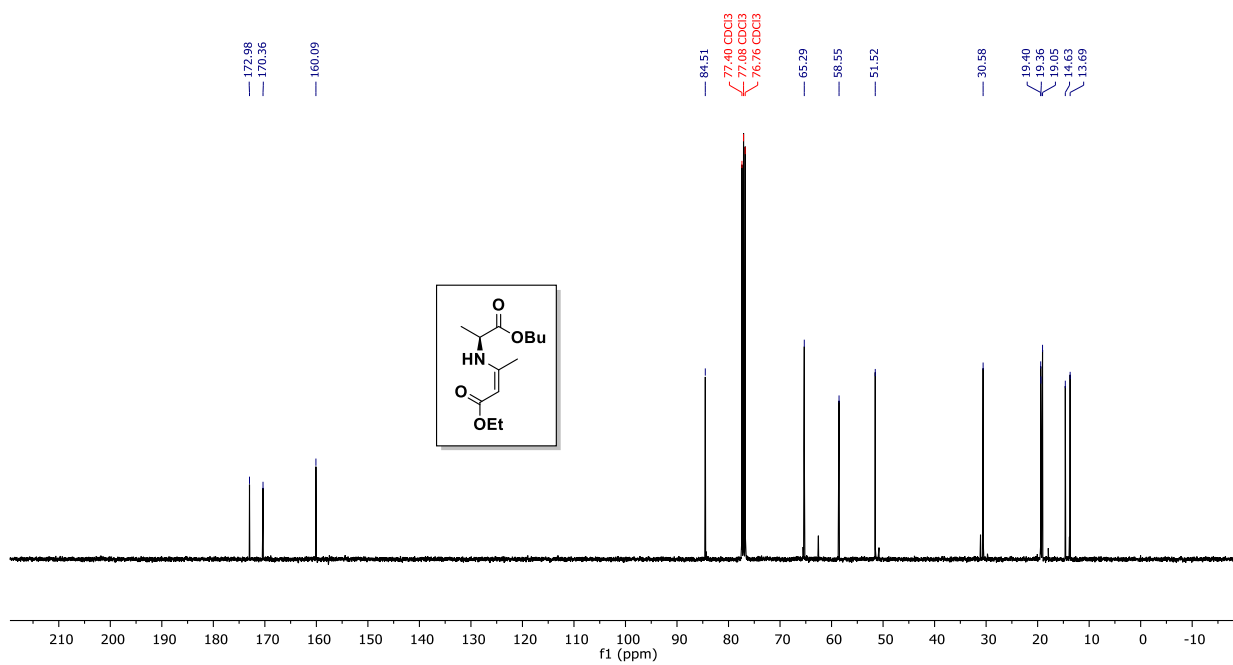

<sup>13</sup>C NMR spectrum of 32 in CDCl<sub>3</sub>.



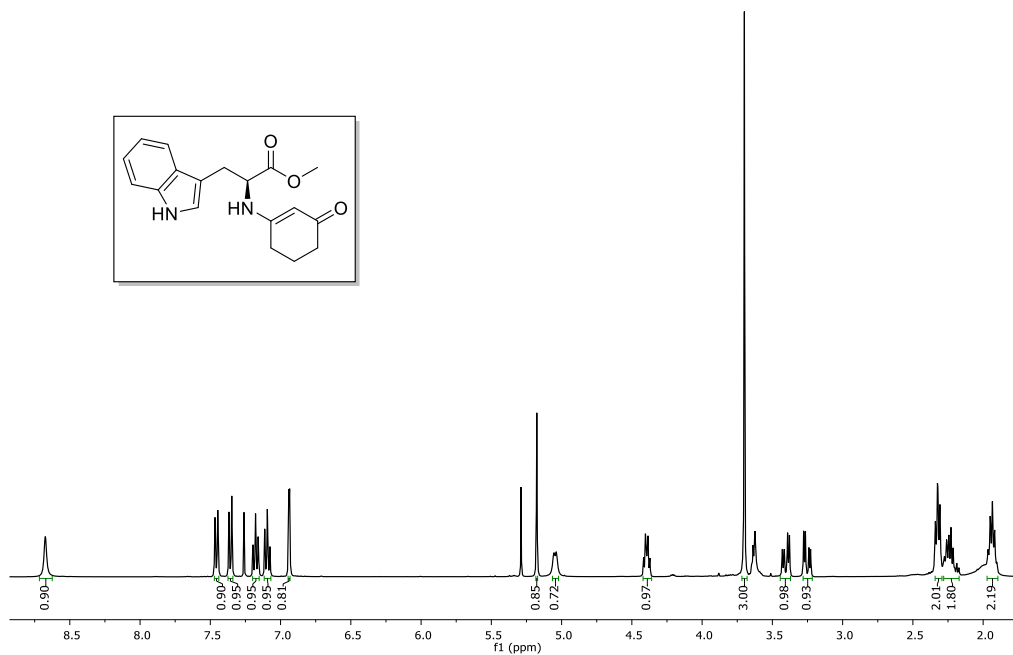

<sup>1</sup>H NMR spectrum of 33 in CDCl<sub>3</sub>.

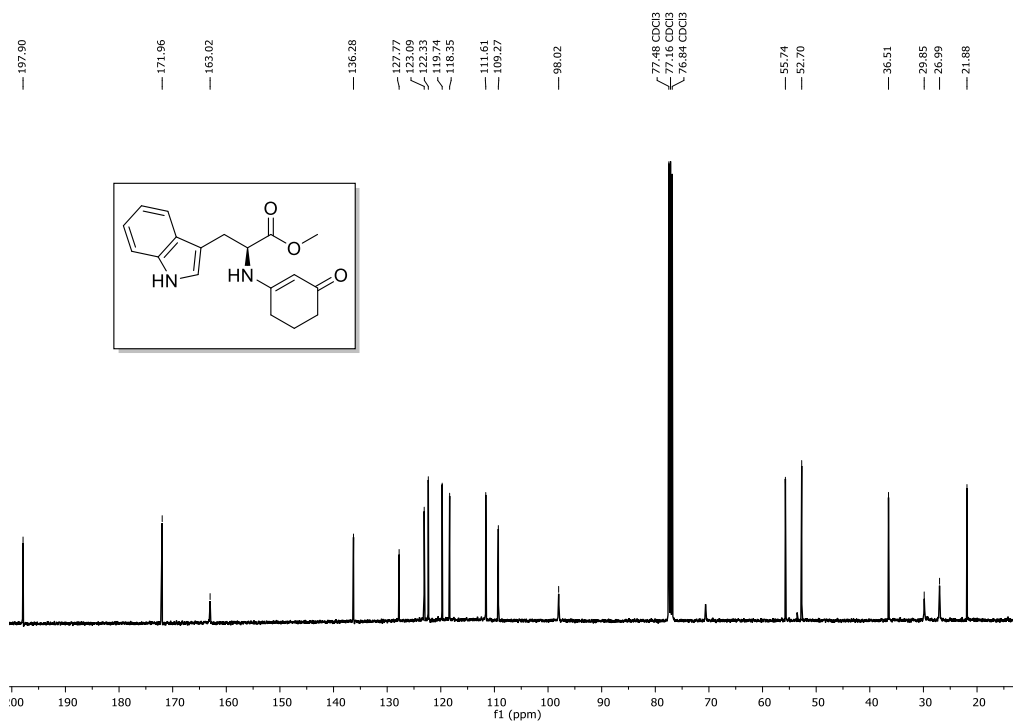

<sup>13</sup>C NMR spectrum of 33 in CDCl<sub>3</sub>.

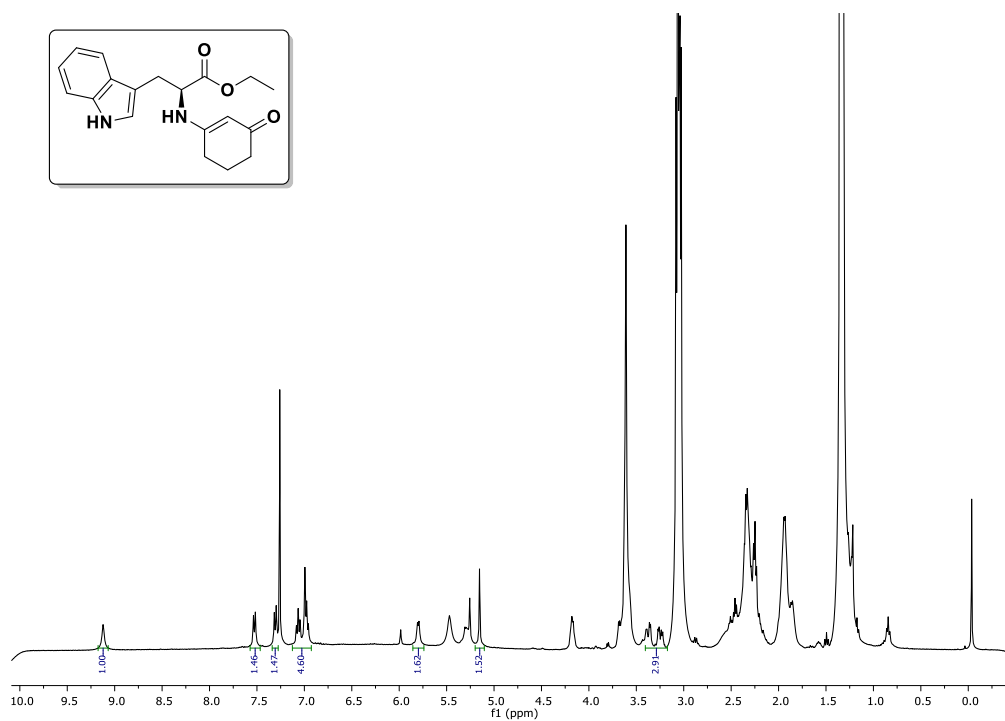

<sup>1</sup>H NMR spectrum of 34 in CDCl<sub>3</sub>.

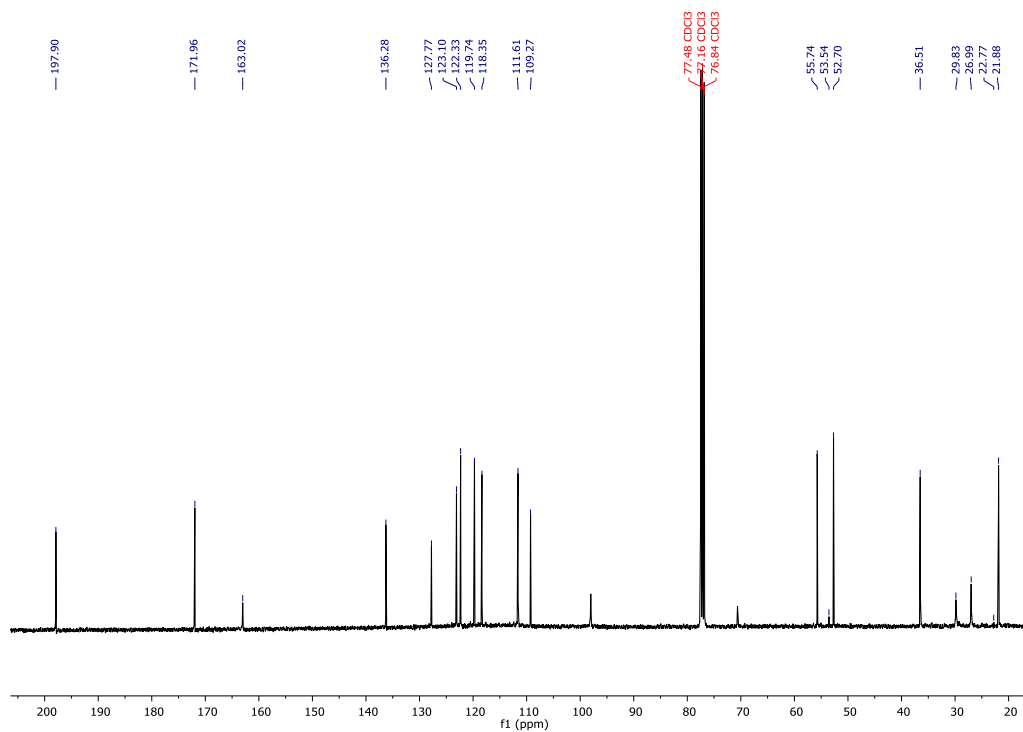

<sup>13</sup>C NMR spectrum of 34 in CDCl<sub>3</sub>.

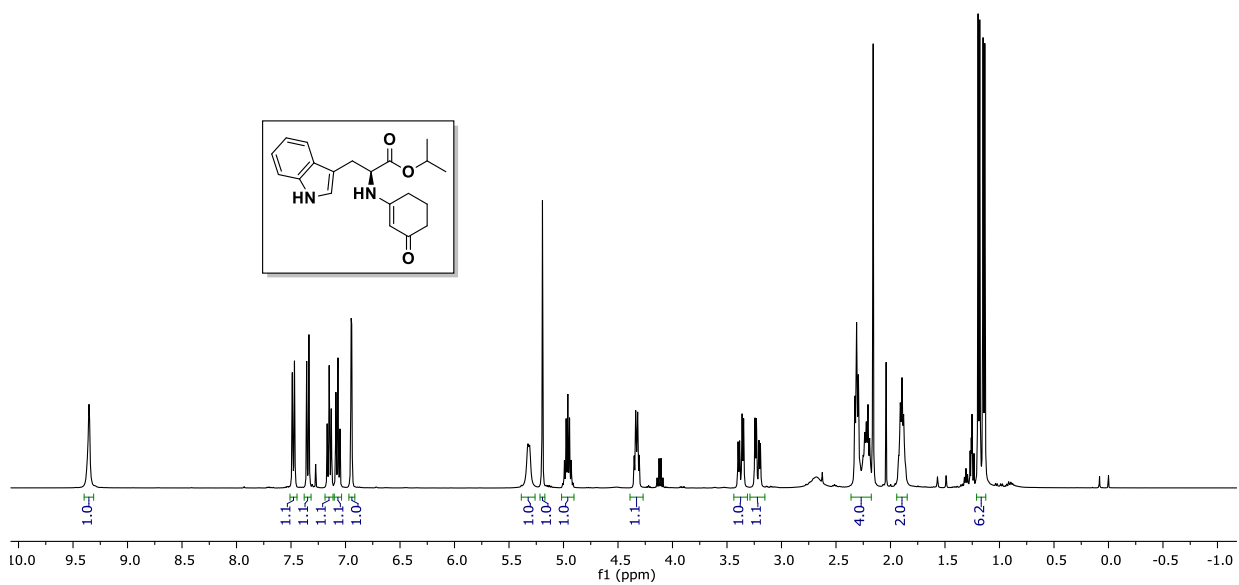

<sup>1</sup>H NMR spectrum of 35 in CDCl<sub>3</sub>.

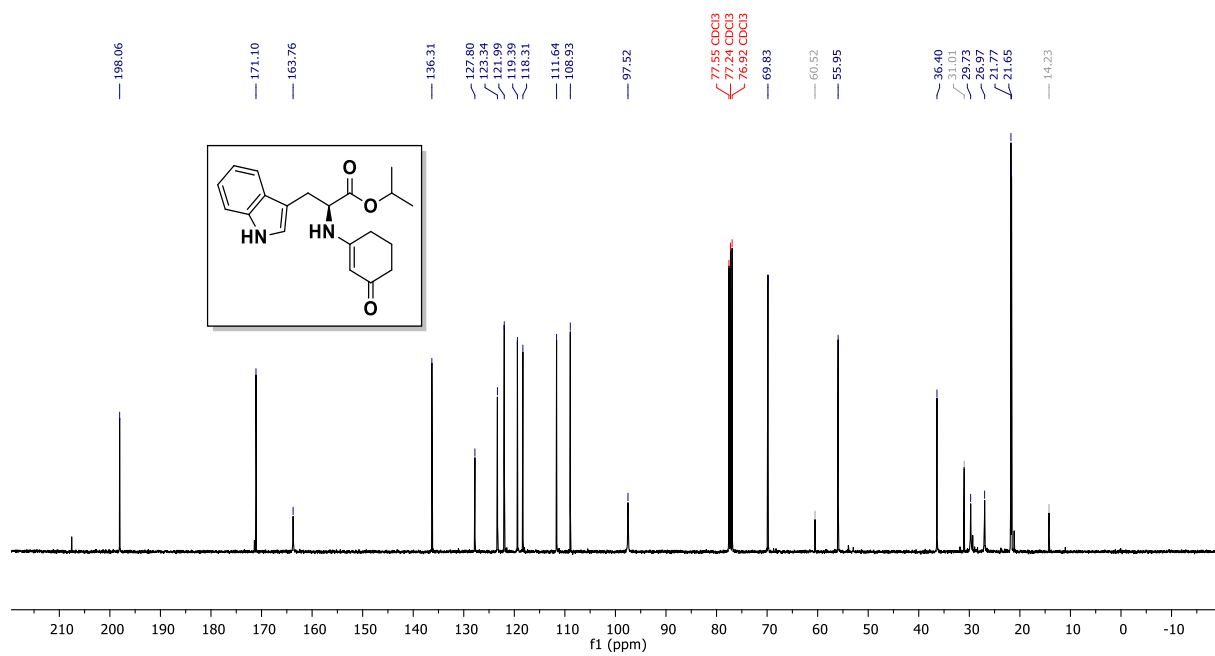

<sup>13</sup>C NMR spectrum of 35 in CDCl<sub>3</sub>.

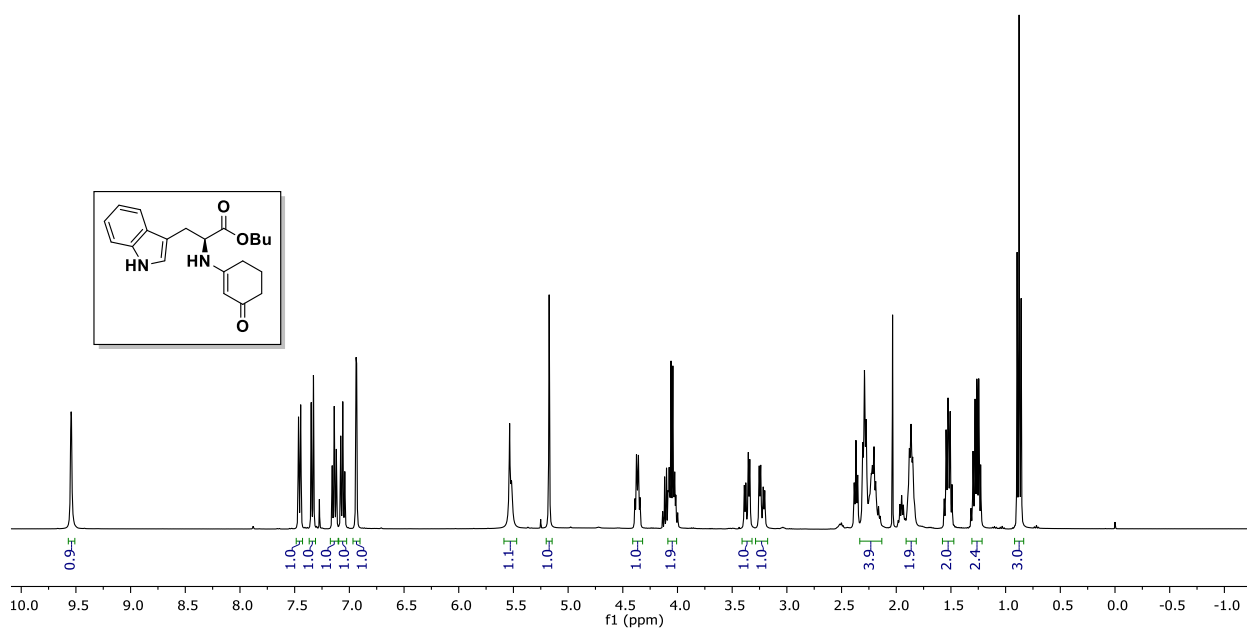

<sup>1</sup>H NMR spectrum of 36 in CDCl<sub>3</sub>.

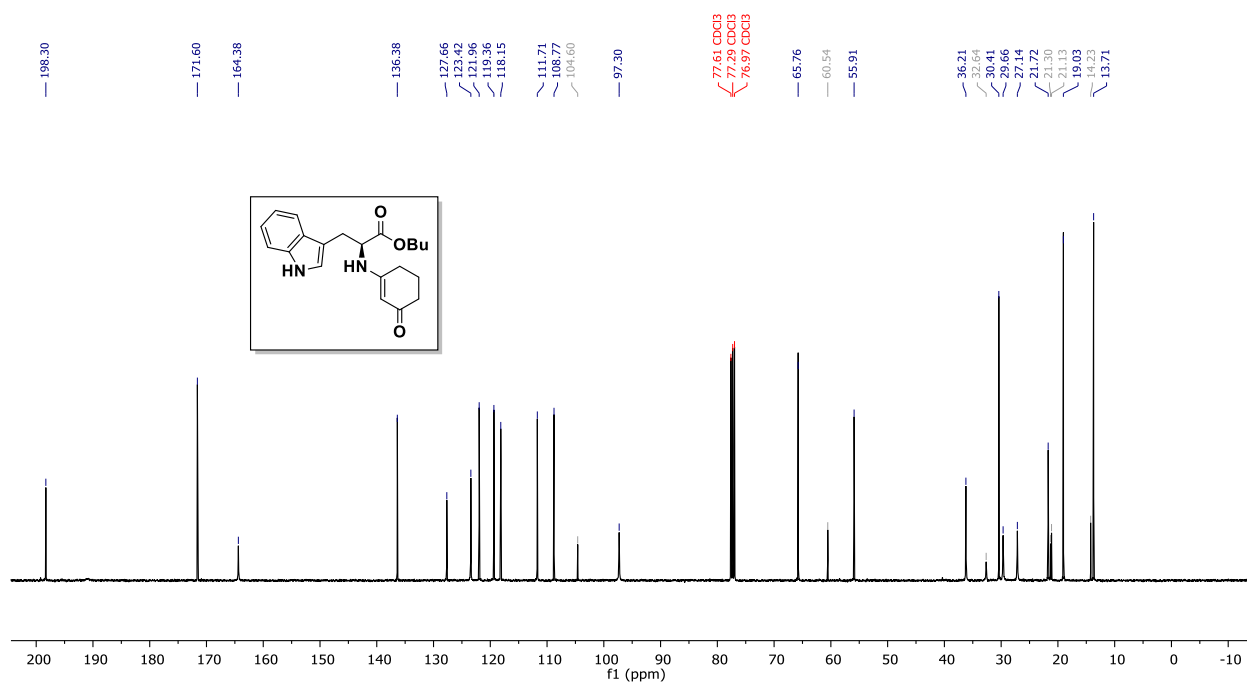

<sup>13</sup>C NMR spectrum of 36 in CDCl<sub>3</sub>.

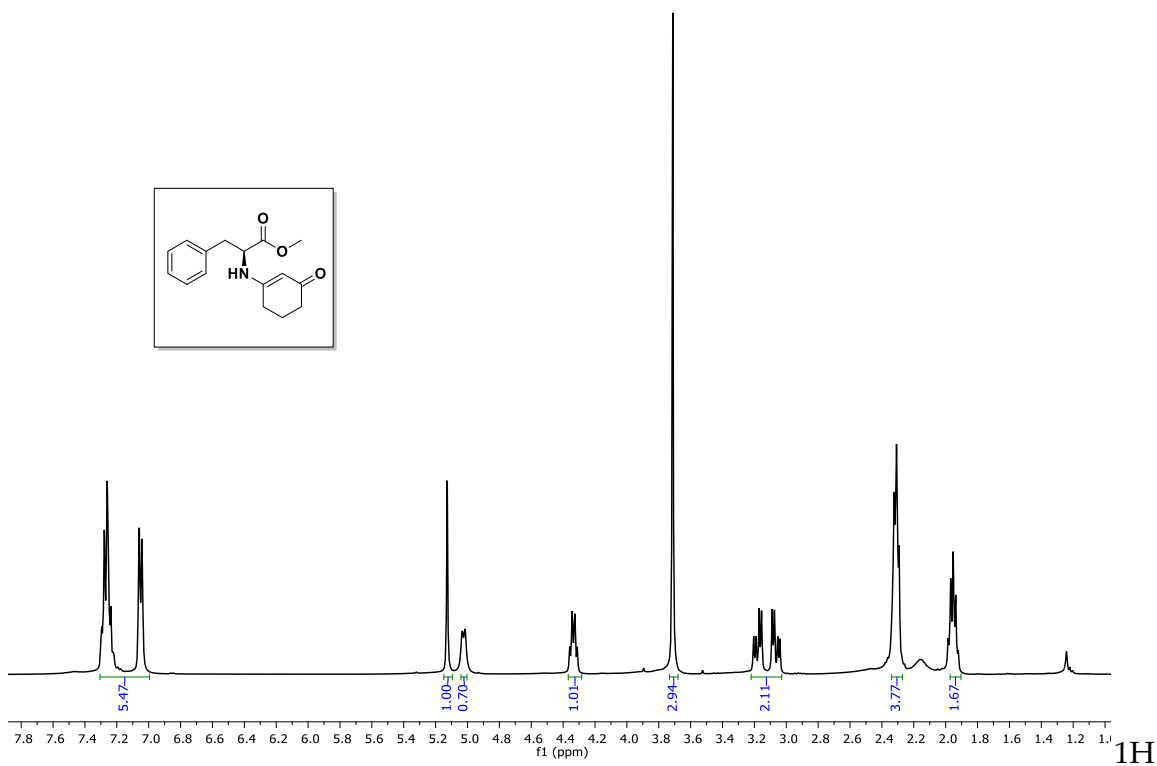

NMR spectrum of 37 in  $\text{CDCl}_3$ .

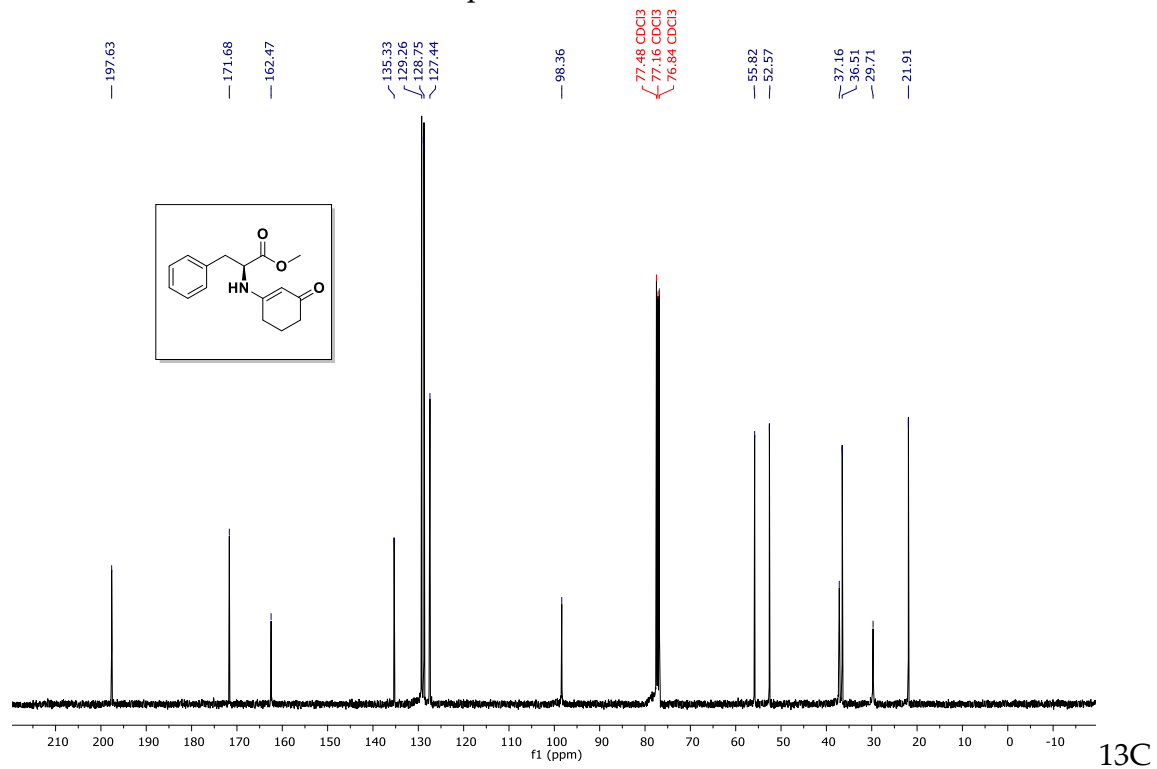

NMR spectrum of 37 in  $\text{CDCl}_3$ .

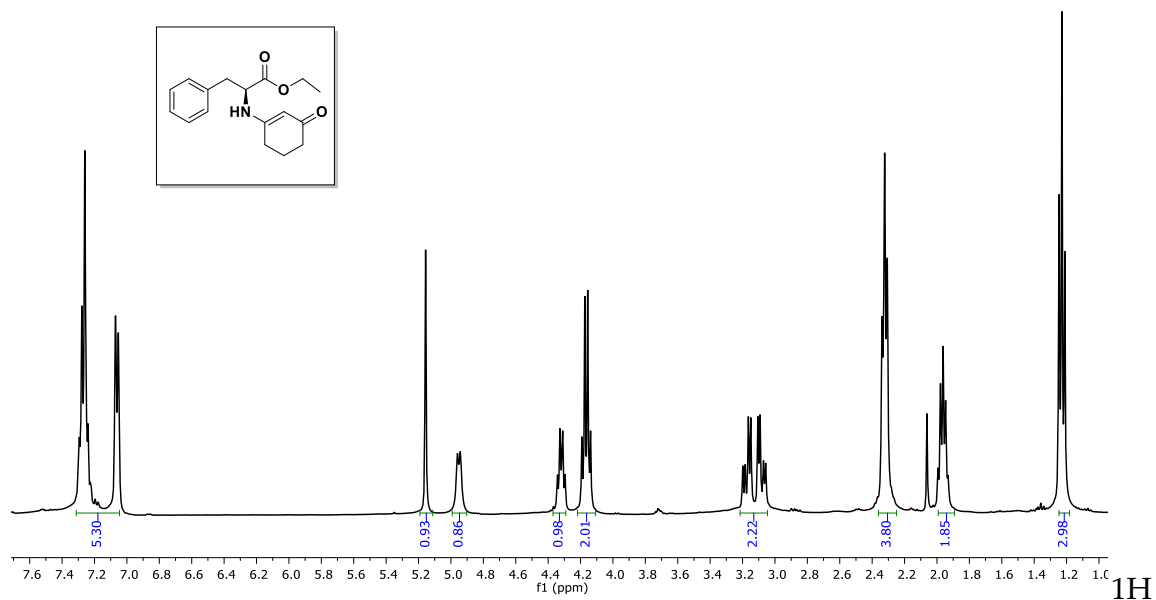

NMR spectrum of 38 in CDCl<sub>3</sub>.

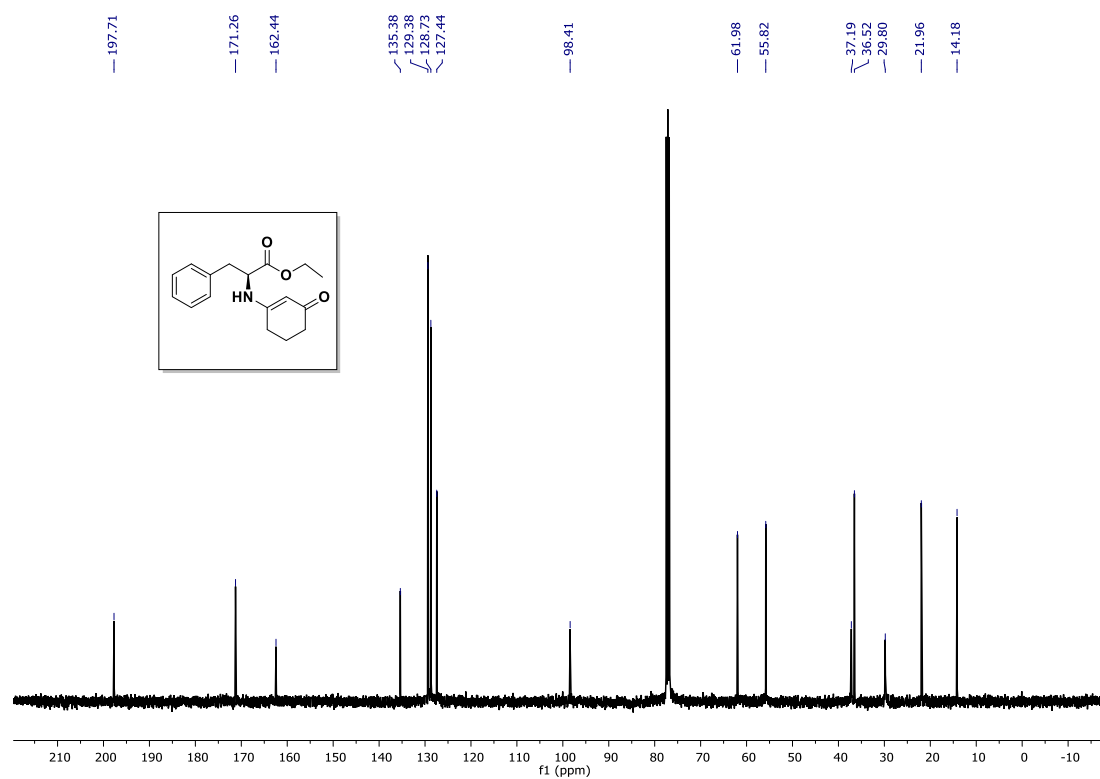

<sup>13</sup>C NMR spectrum of 38 in CDCl<sub>3</sub>.

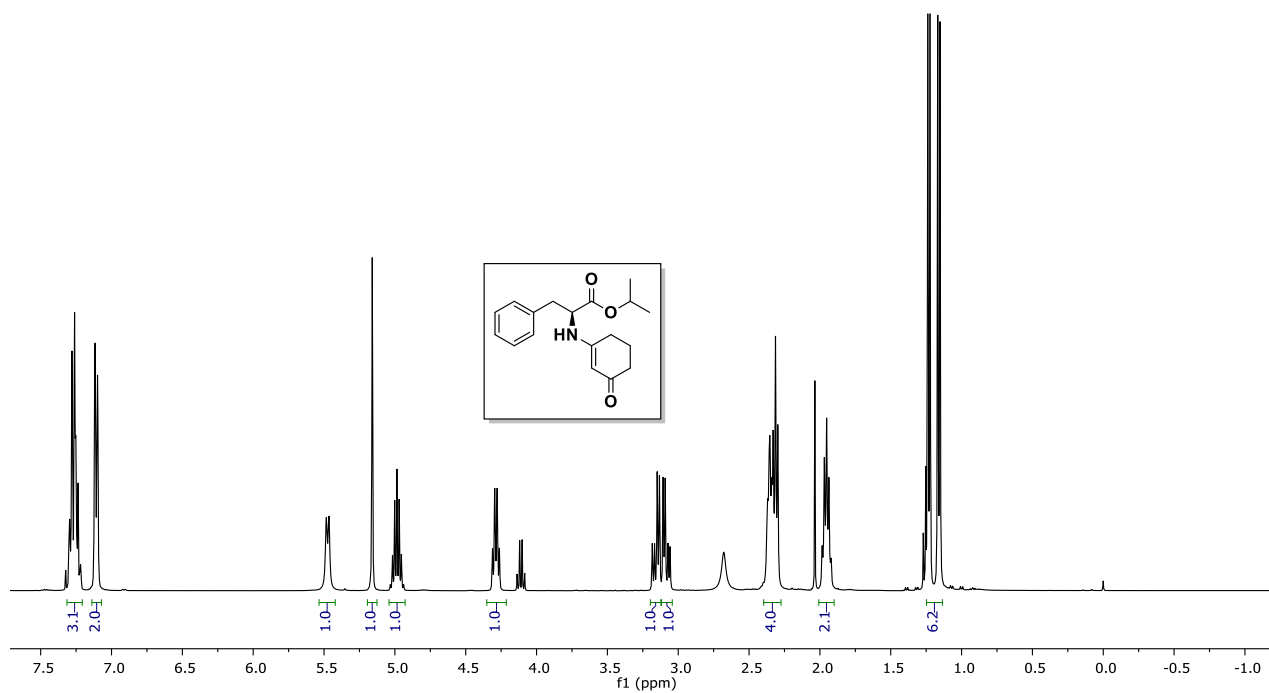

<sup>1</sup>H NMR spectrum of 39 in CDCl<sub>3</sub>.

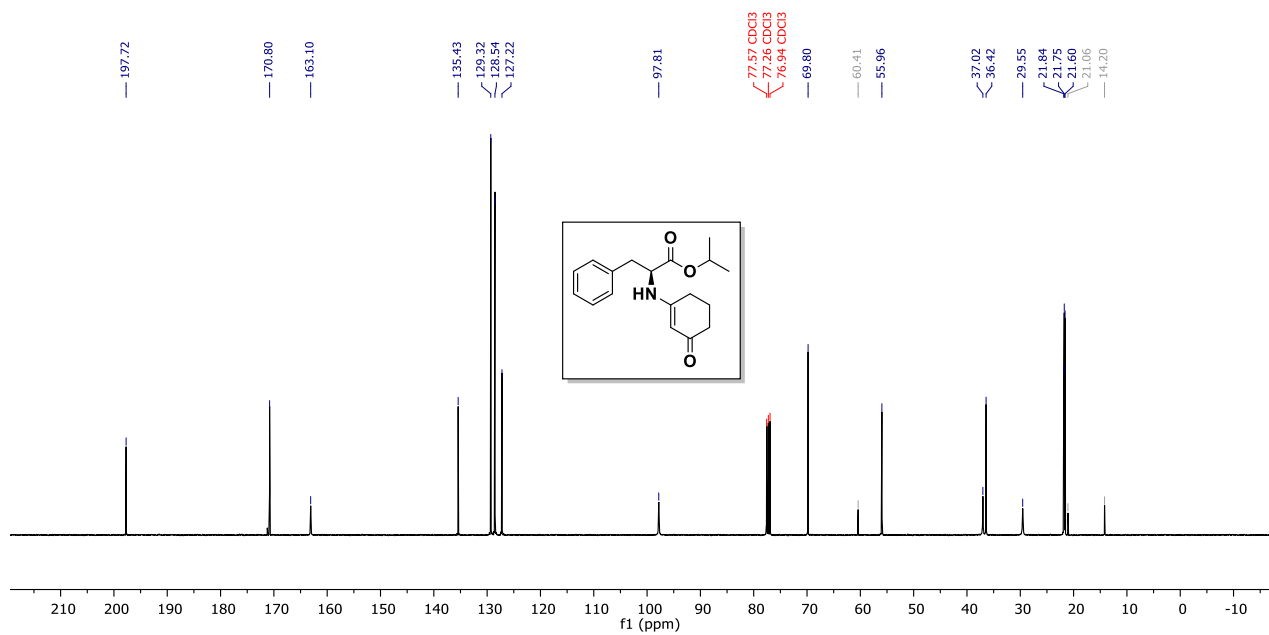

<sup>13</sup>C NMR spectrum of 39 in CDCl<sub>3</sub>.

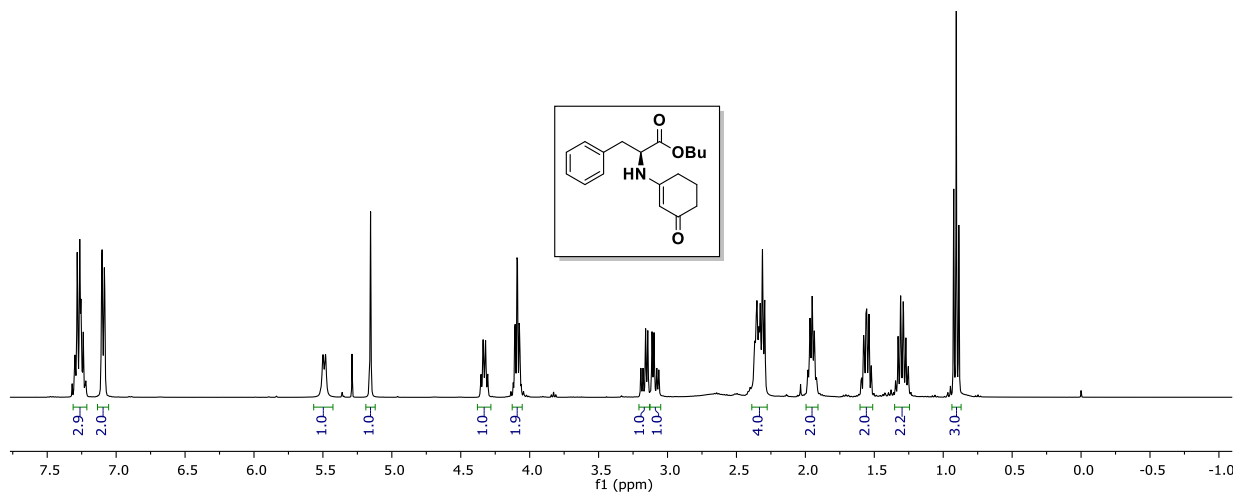

<sup>1</sup>H NMR spectrum of 40 in CDCl<sub>3</sub>.

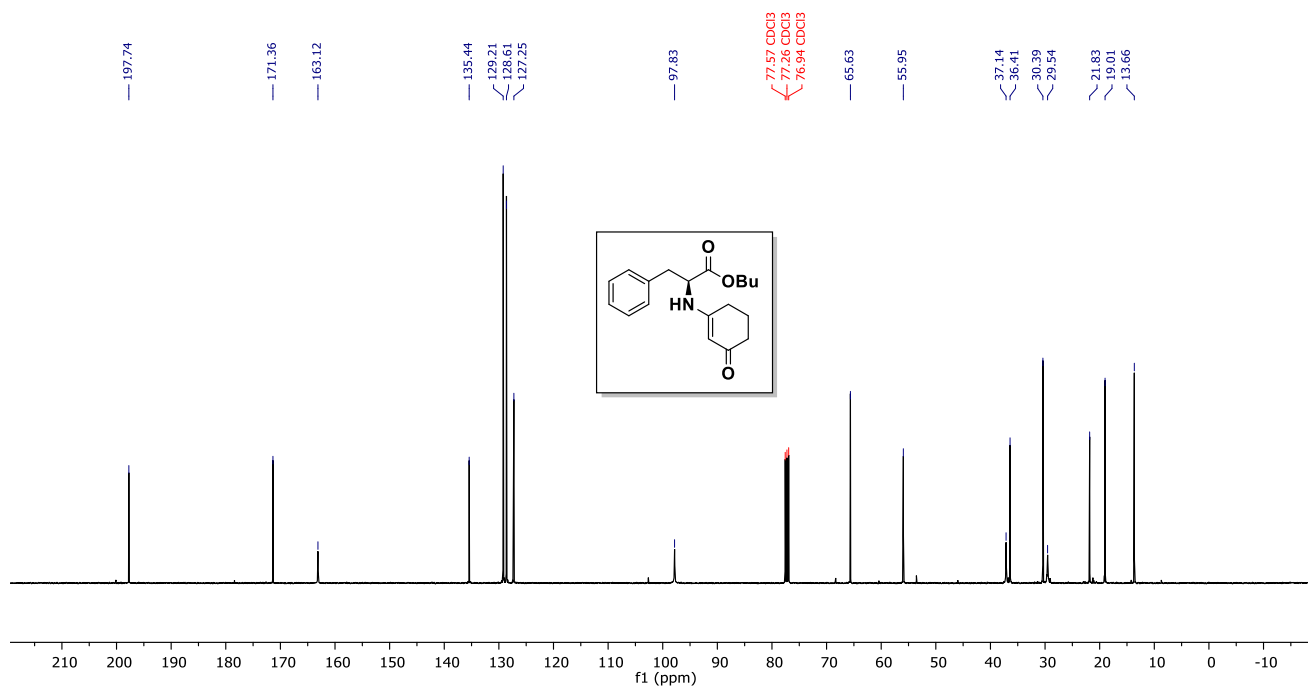

<sup>13</sup>C NMR spectrum of 40 in CDCl<sub>3</sub>.



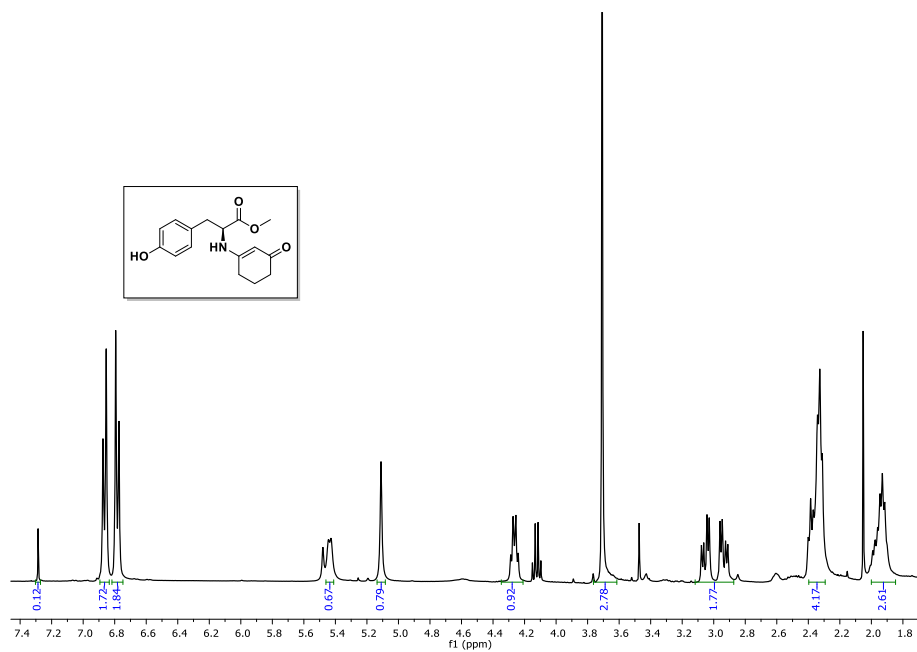

<sup>1</sup>H NMR spectrum of 41 in CDCl<sub>3</sub>.

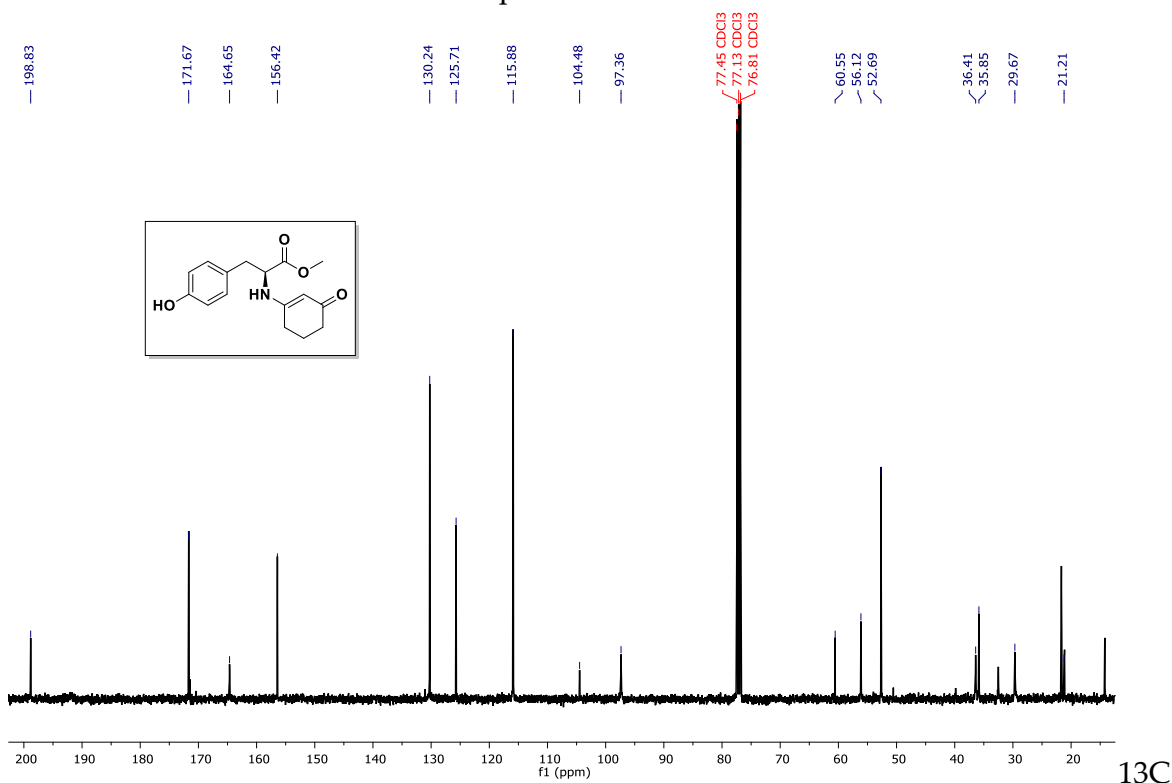

<sup>13</sup>C NMR spectrum of 41 in CDCl<sub>3</sub>.

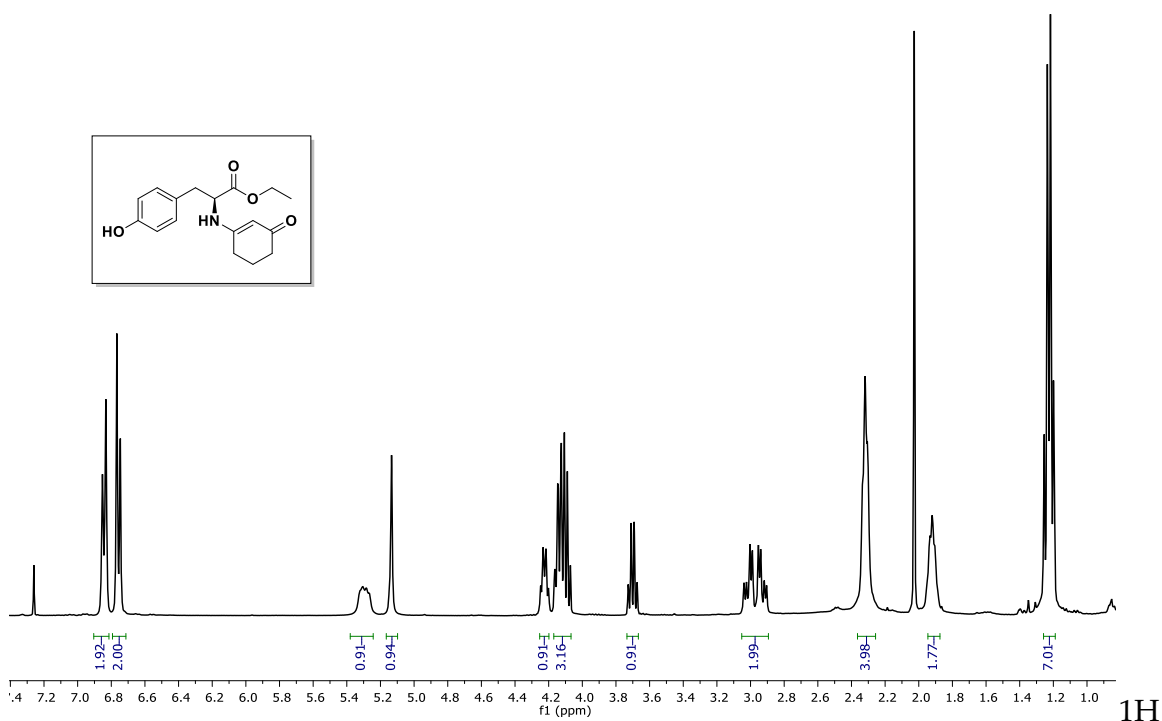

<sup>1</sup>H NMR spectrum of 42 in CDCl<sub>3</sub>.

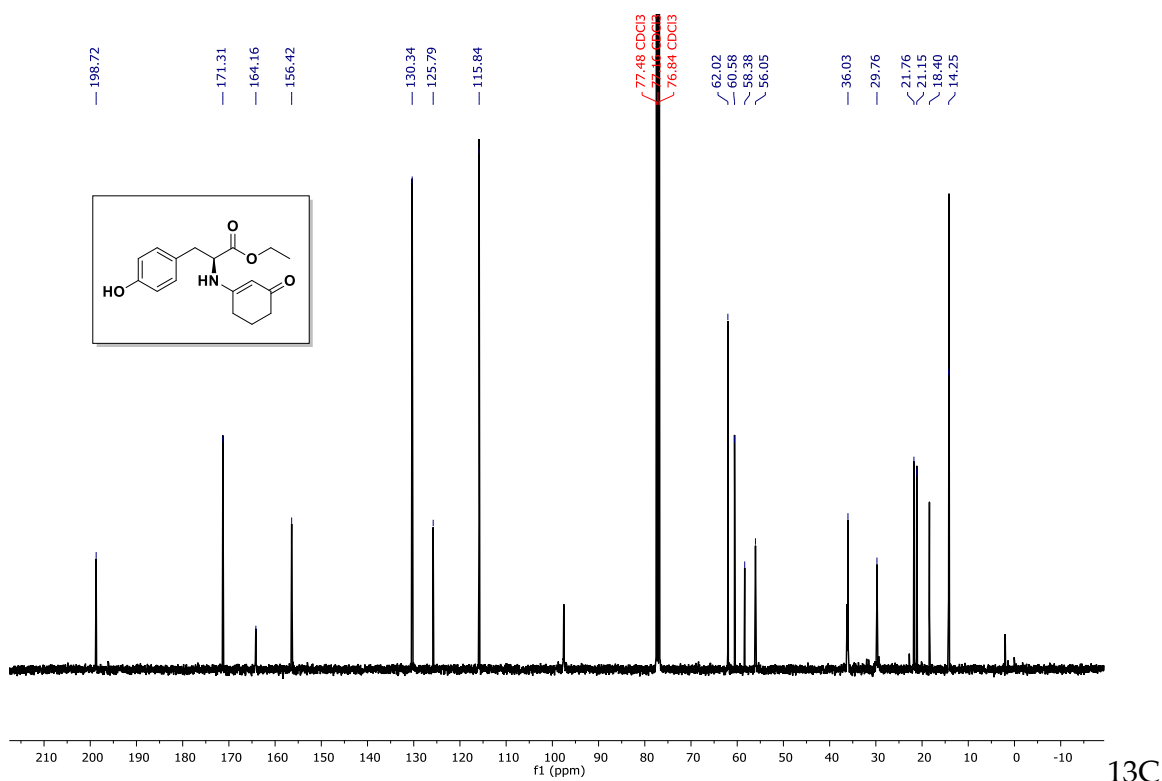

<sup>13</sup>C NMR spectrum of 42 in CDCl<sub>3</sub>.

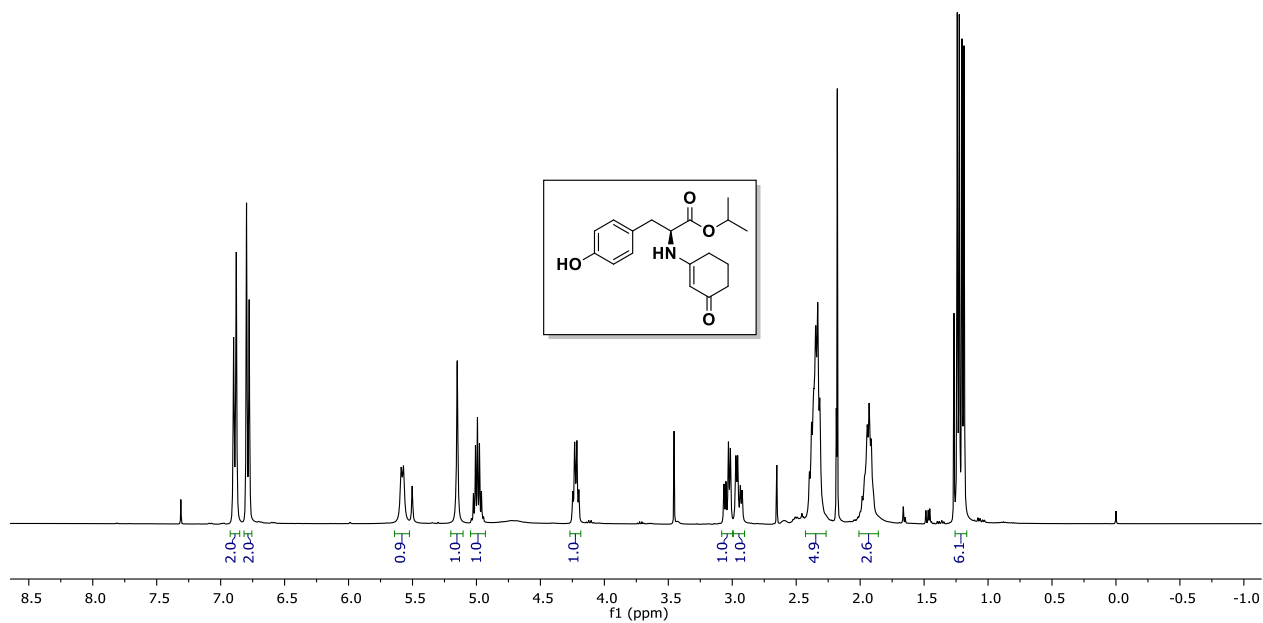

<sup>1</sup>H NMR spectrum of 43 in CDCl<sub>3</sub>.

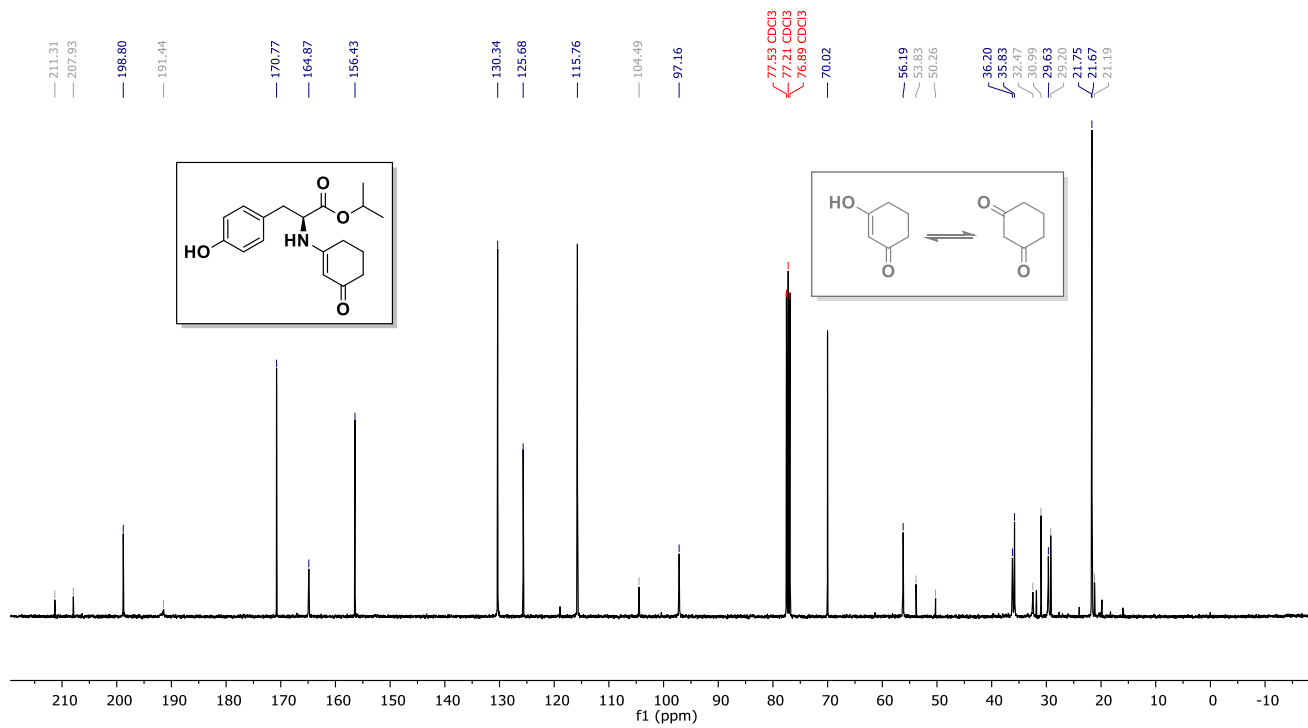

<sup>13</sup>C NMR spectrum of 43 in CDCl<sub>3</sub>.

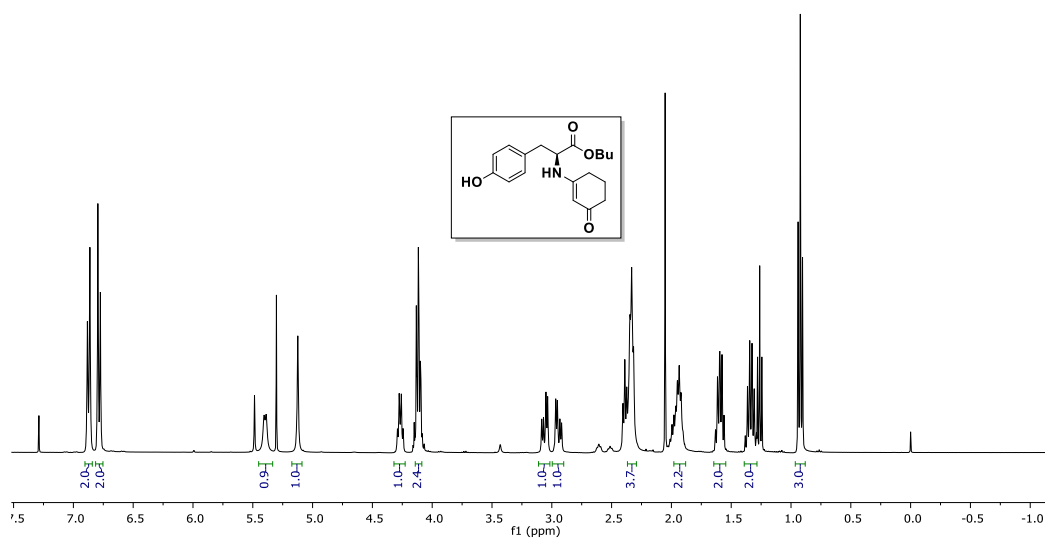

<sup>1</sup>H NMR spectrum of 44 in CDCl<sub>3</sub>.

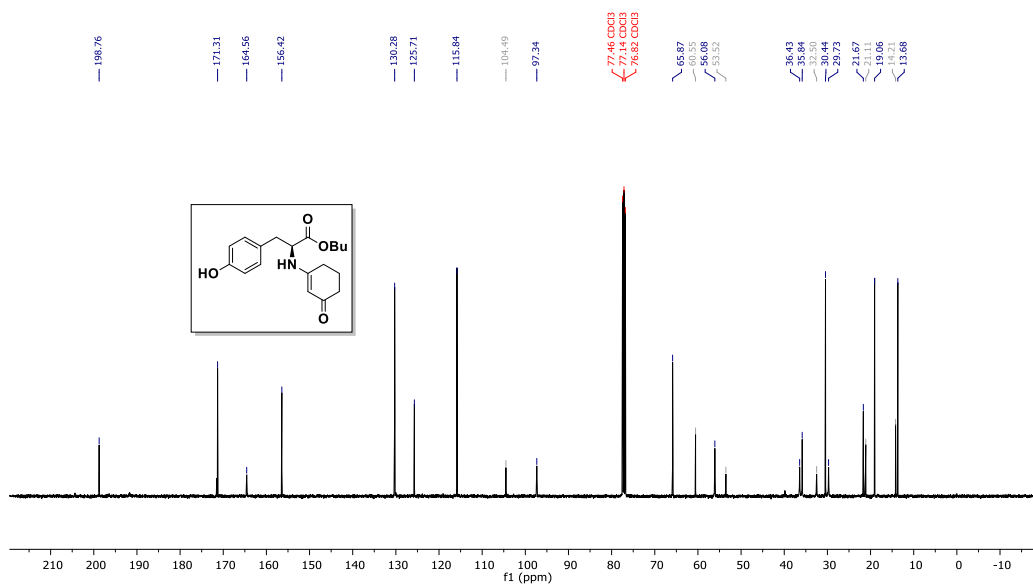

<sup>13</sup>C NMR spectrum of 44 in CDCl<sub>3</sub>.

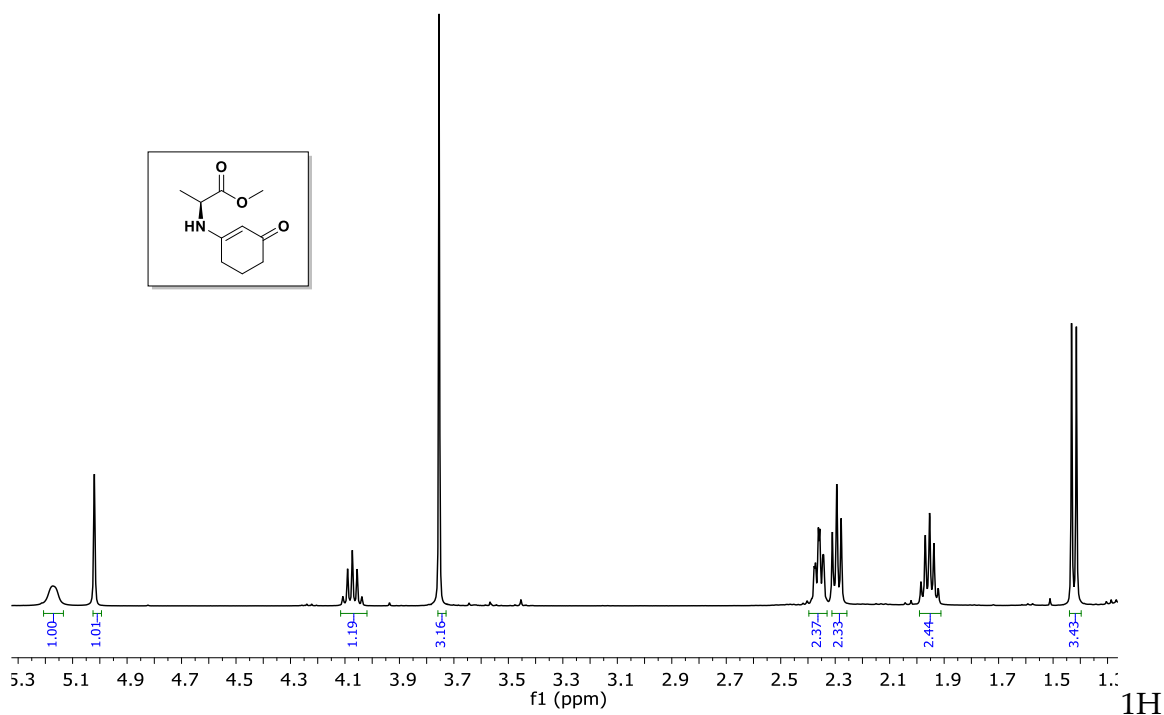

<sup>1</sup>H NMR spectrum of 45 in CDCl<sub>3</sub>.

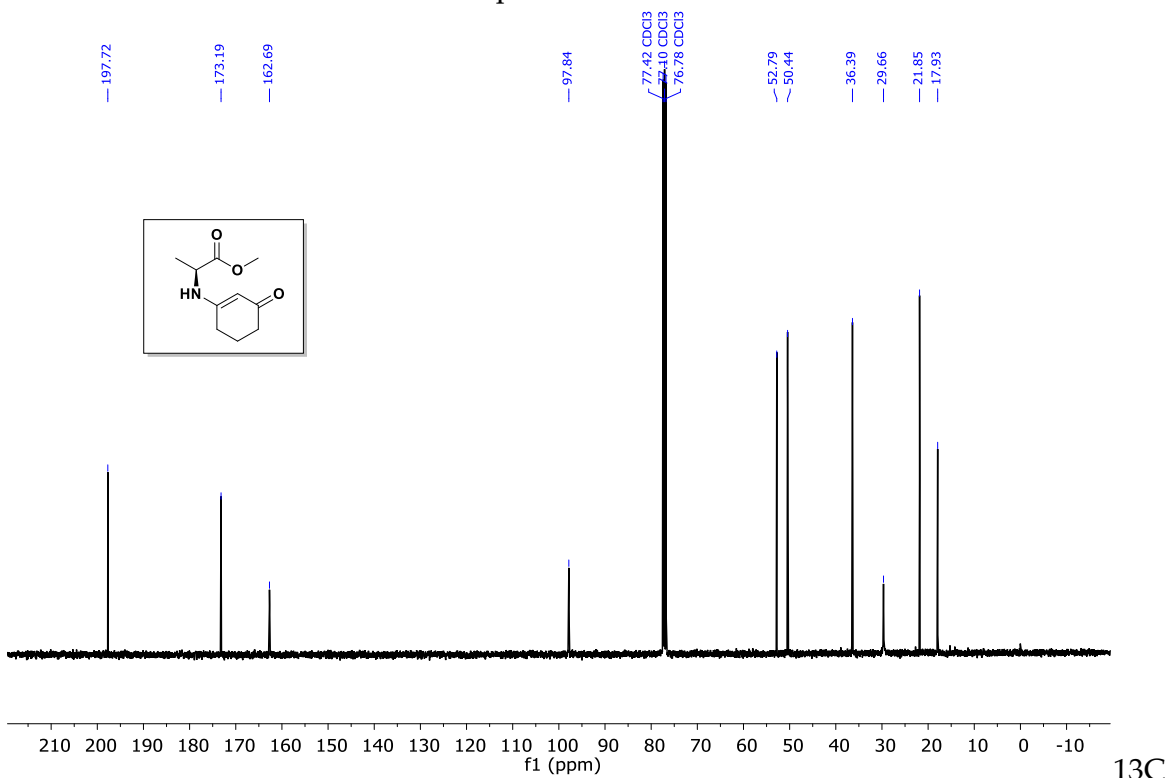

<sup>13</sup>C NMR spectrum of 45 in CDCl<sub>3</sub>.

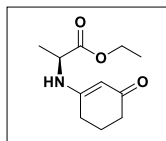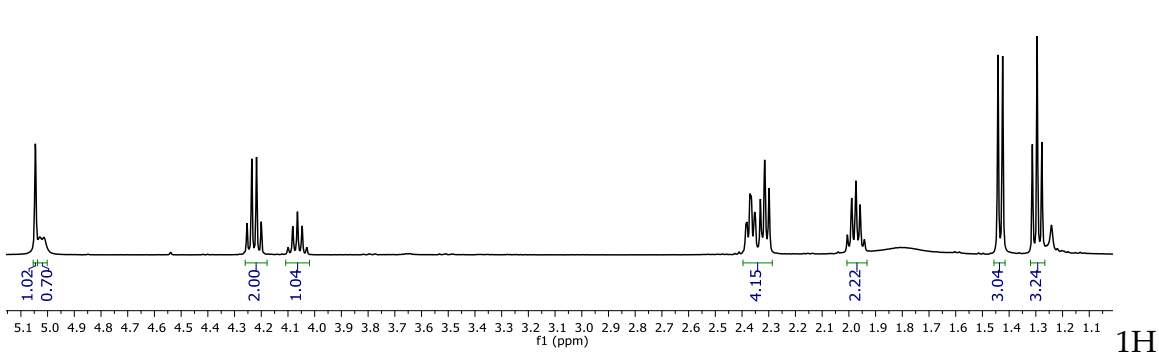

$^1\text{H}$  NMR spectrum of 46 in  $\text{CDCl}_3$ .

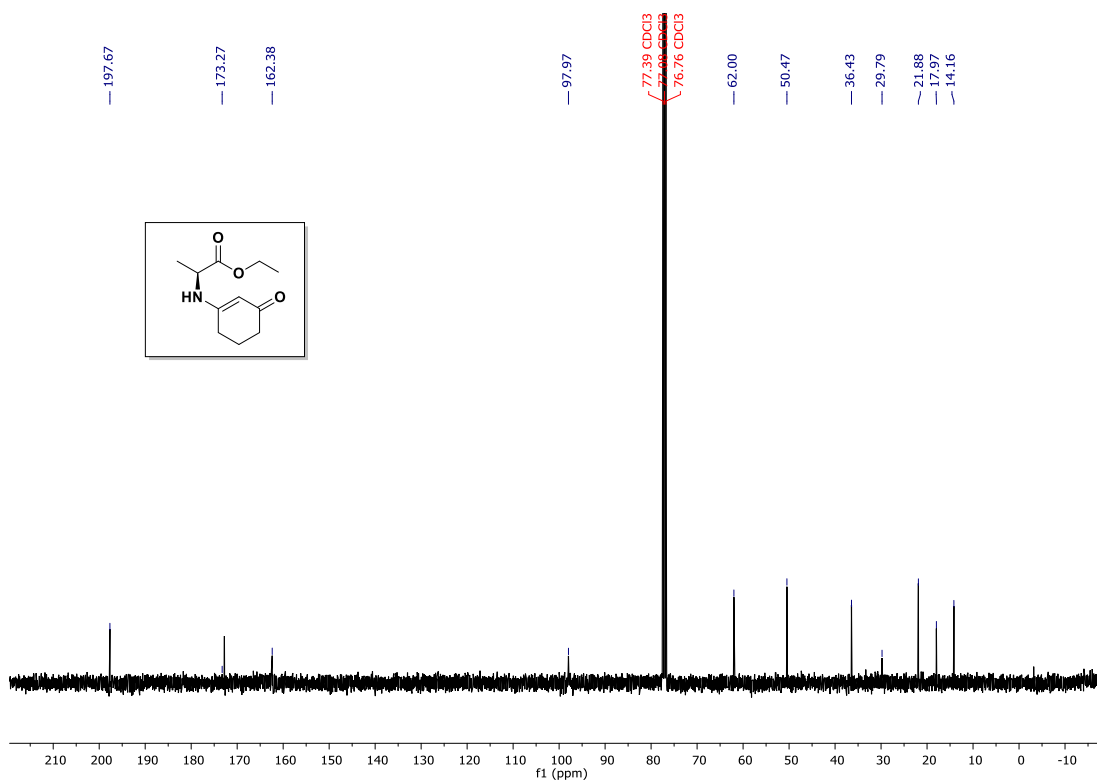

$^{13}\text{C}$  NMR spectrum of 46 in  $\text{CDCl}_3$ .

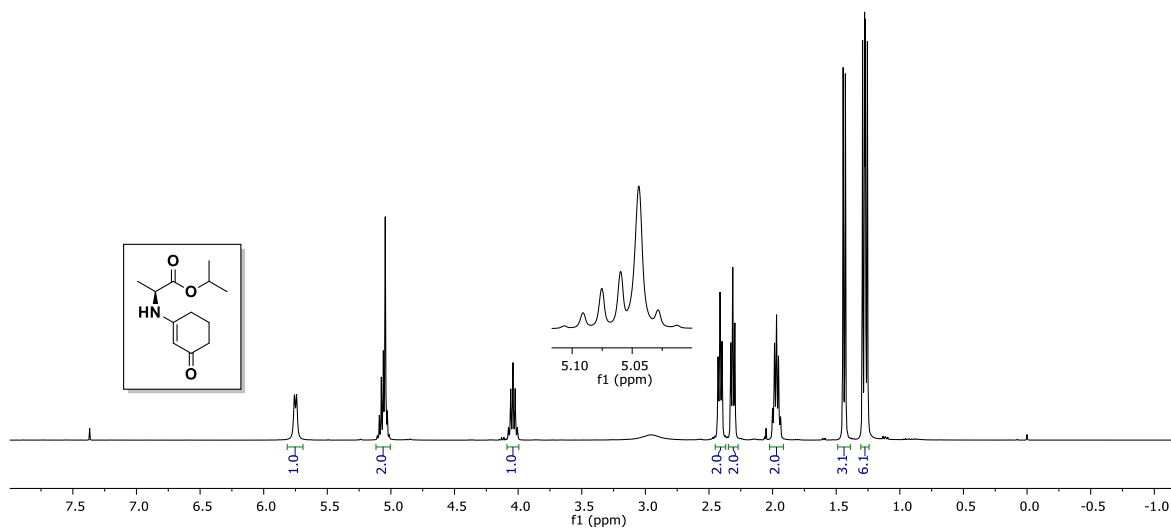

<sup>1</sup>H NMR spectrum of 47 in CDCl<sub>3</sub>.

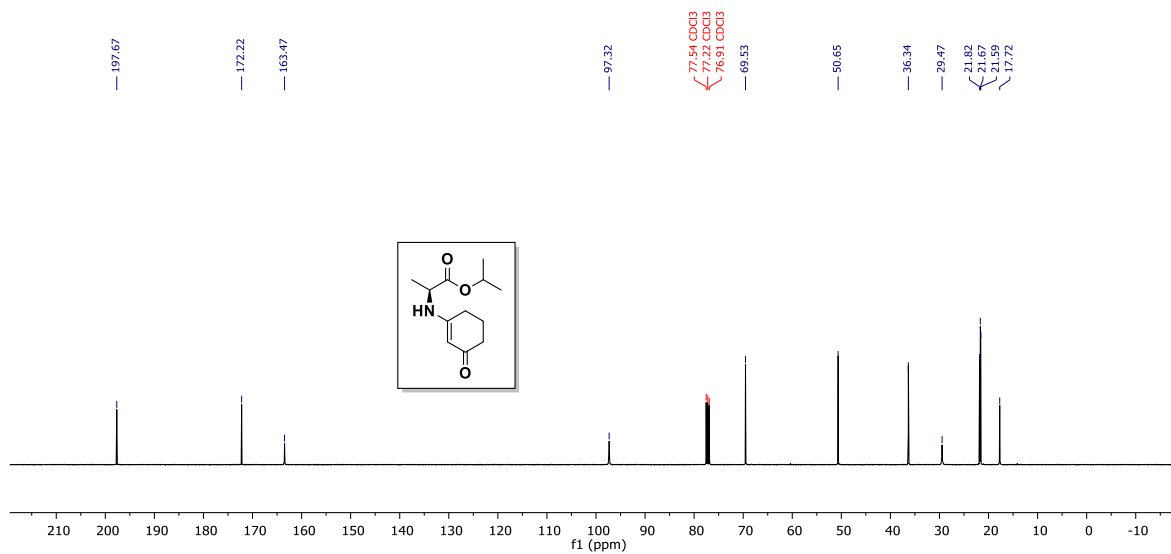

<sup>13</sup>C NMR spectrum of 47 in CDCl<sub>3</sub>.

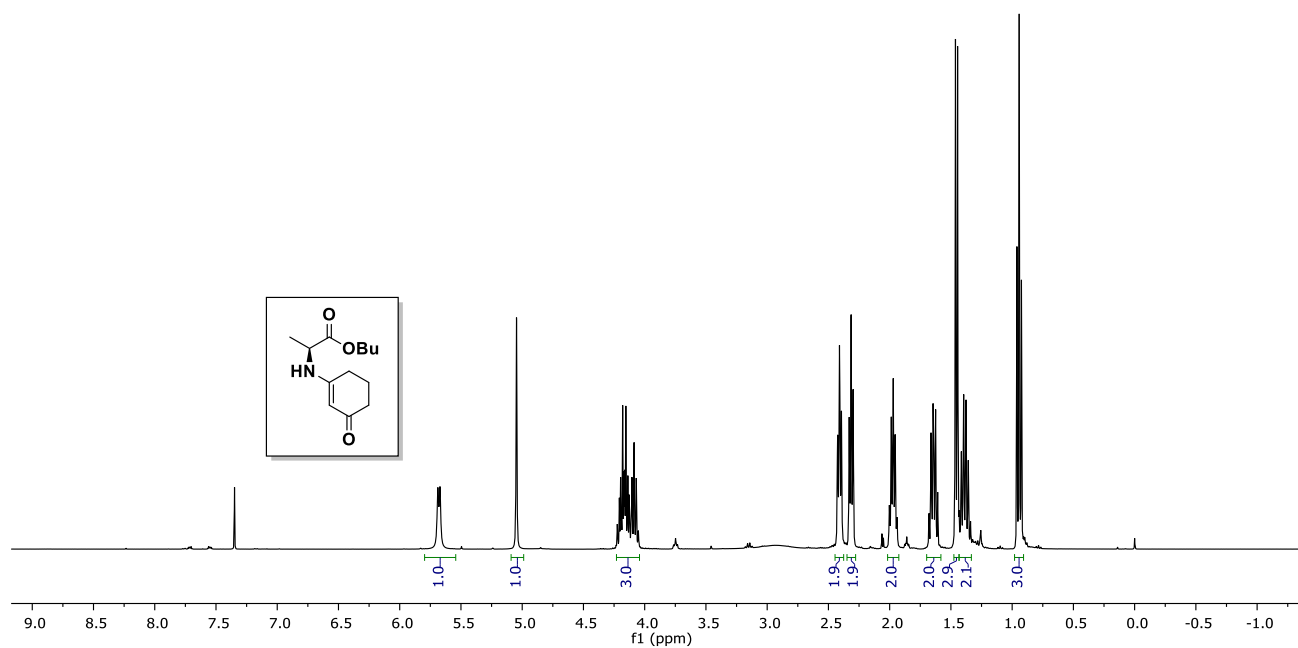

<sup>1</sup>H NMR spectrum of 48 in CDCl<sub>3</sub>.

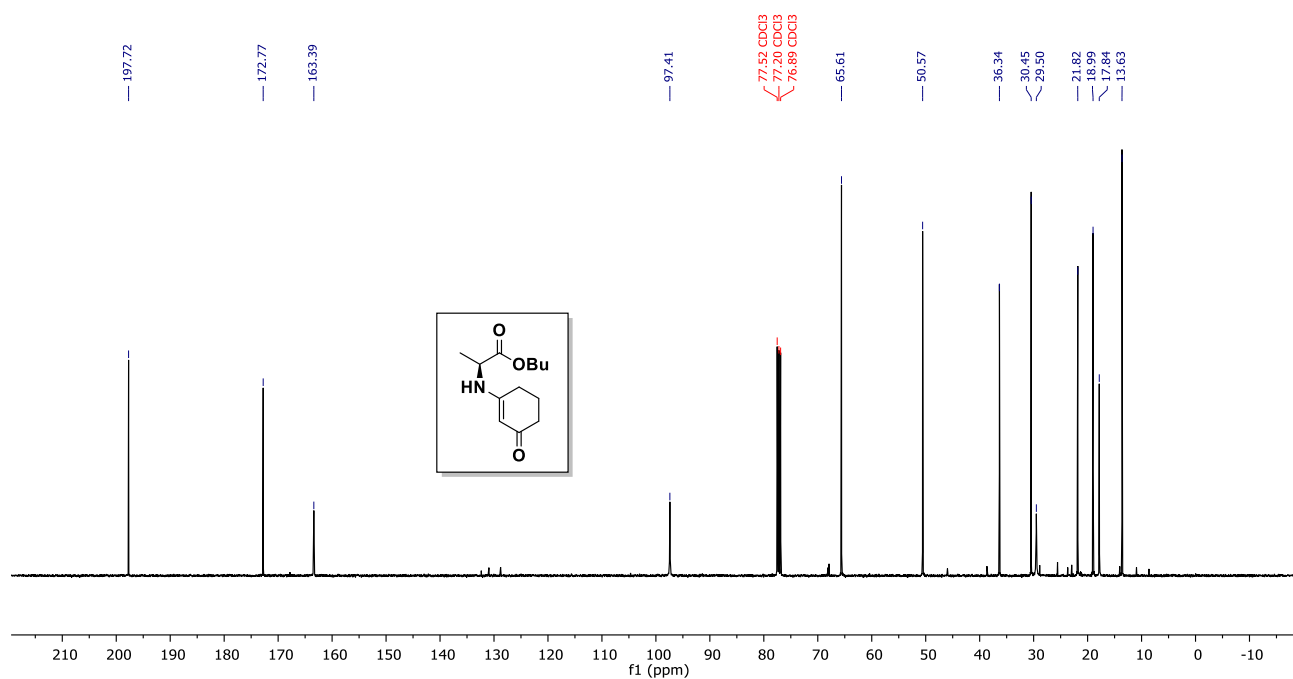

<sup>13</sup>C NMR spectrum of 48 in CDCl<sub>3</sub>.



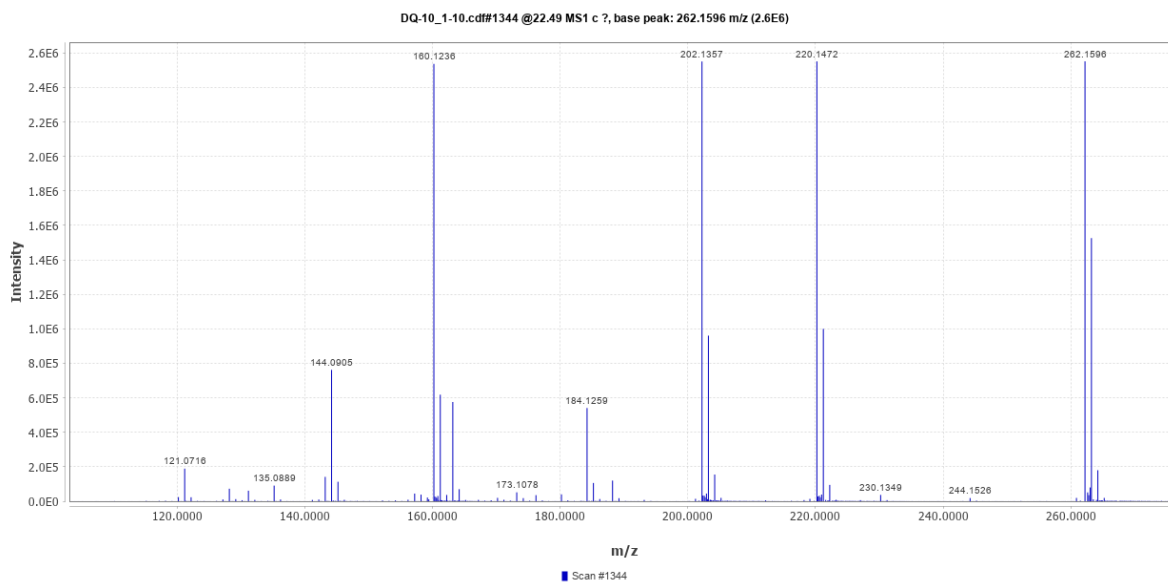

HRMS spectrum of 5

**C<sub>17</sub>H<sub>23</sub>NO<sub>3</sub> [M+H]<sup>+</sup>**

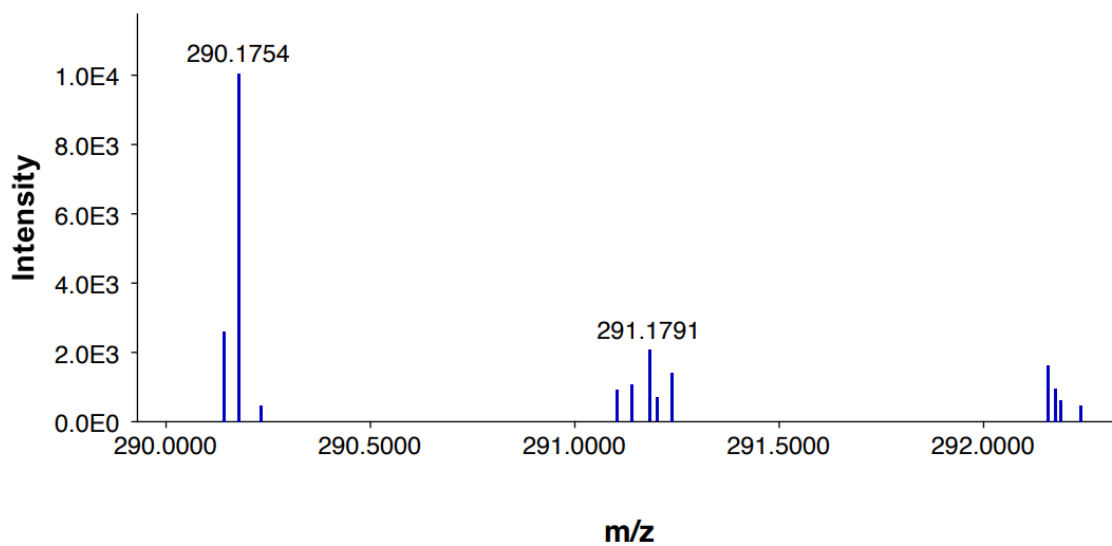

HRMS spectrum of 7

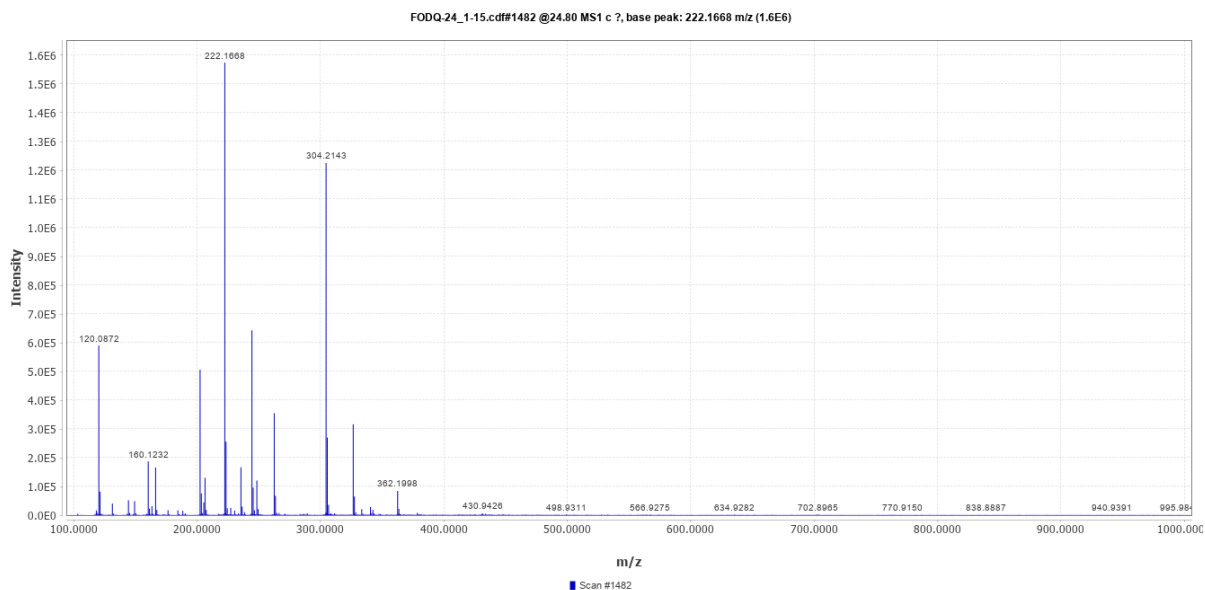

HRMS spectrum of 8

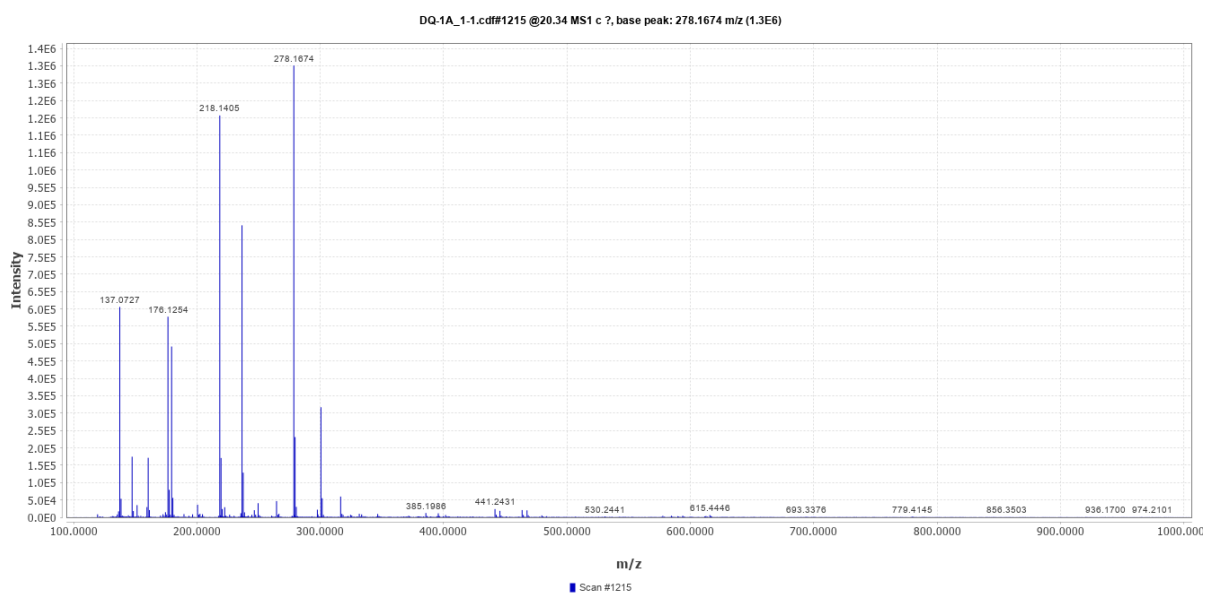

HRMS spectrum of 9

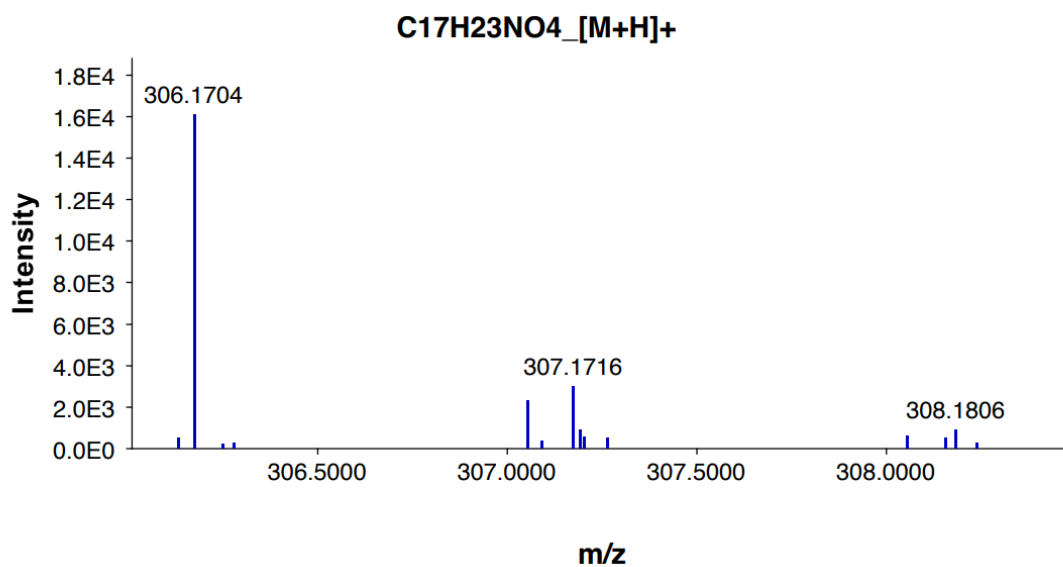

HRMS spectrum of 11

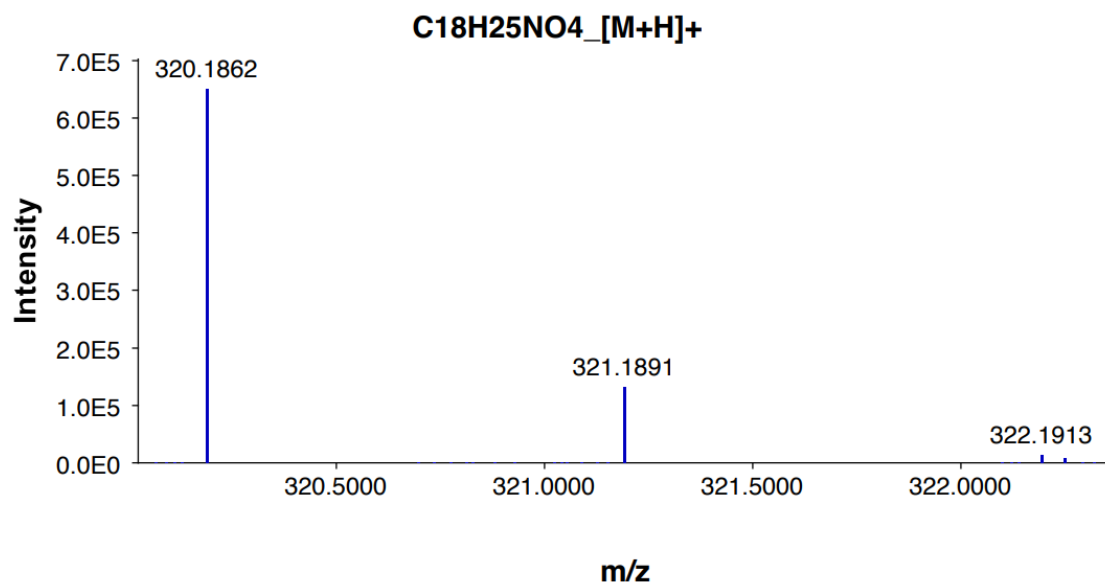

HRMS spectrum of 12.

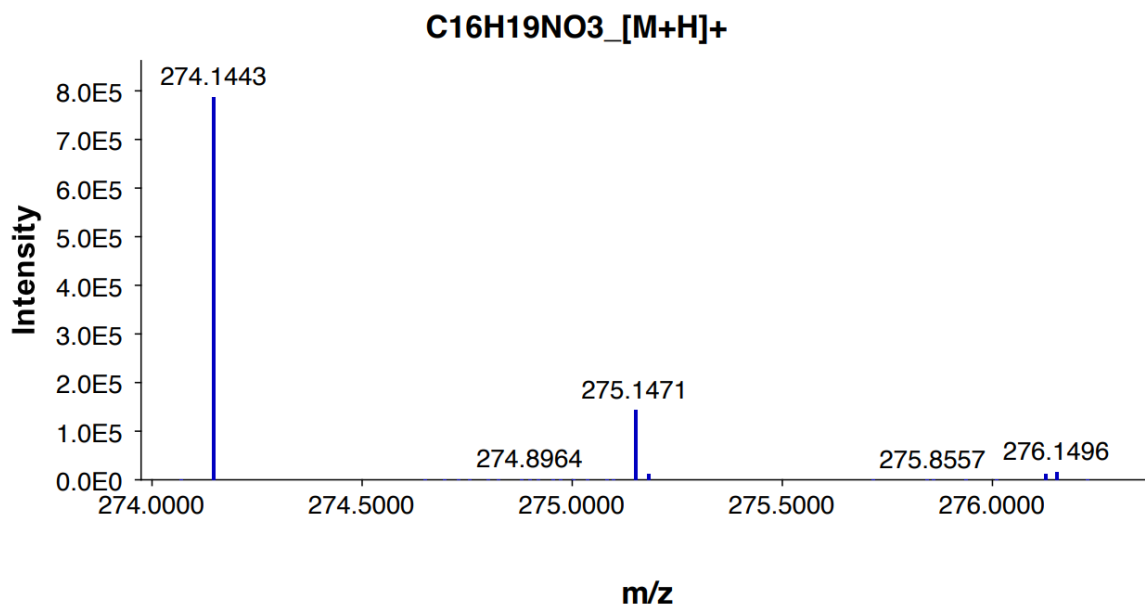

HRMS spectrum of 37.

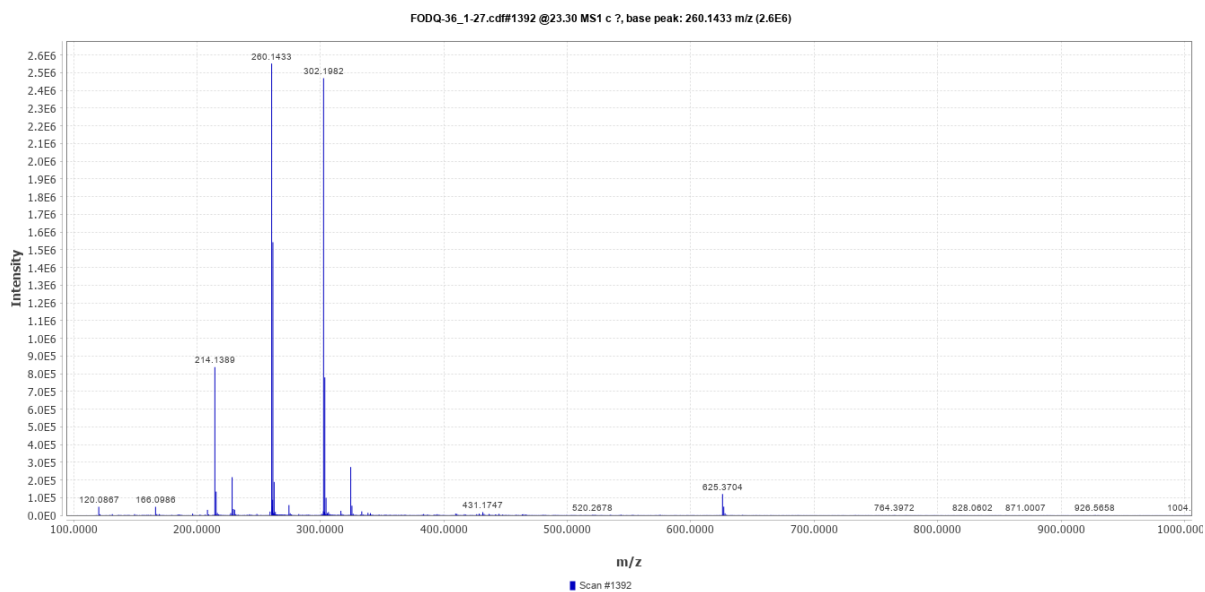

HRMS spectrum of 39

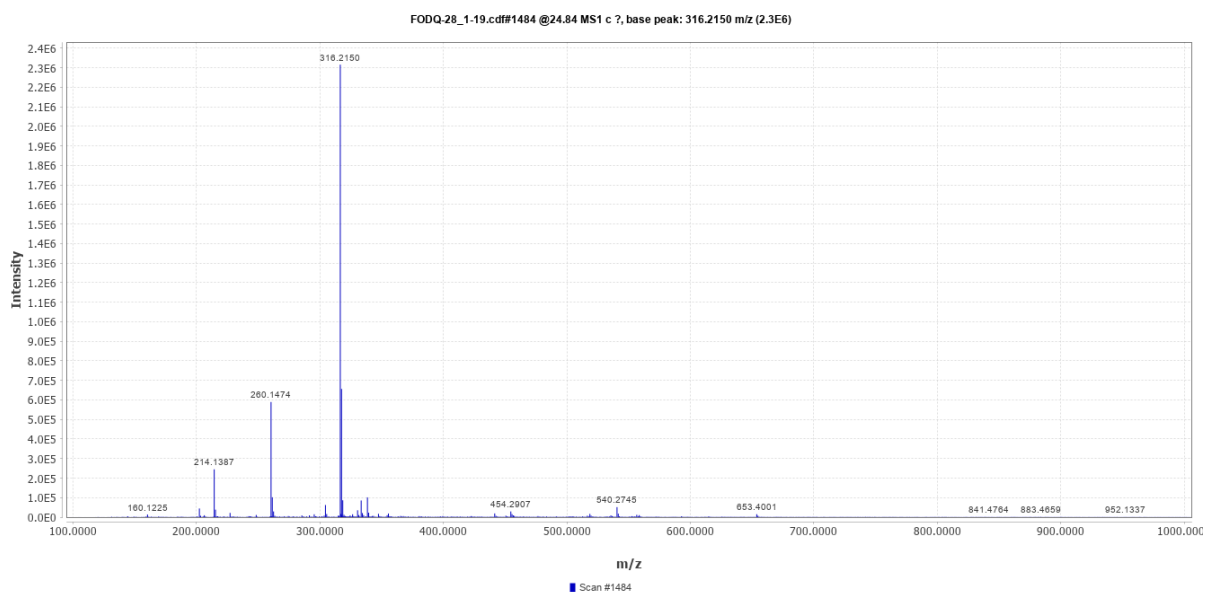

HRMS spectrum of 40  
**C<sub>16</sub>H<sub>19</sub>NO<sub>4</sub> [M+H]<sup>+</sup>**

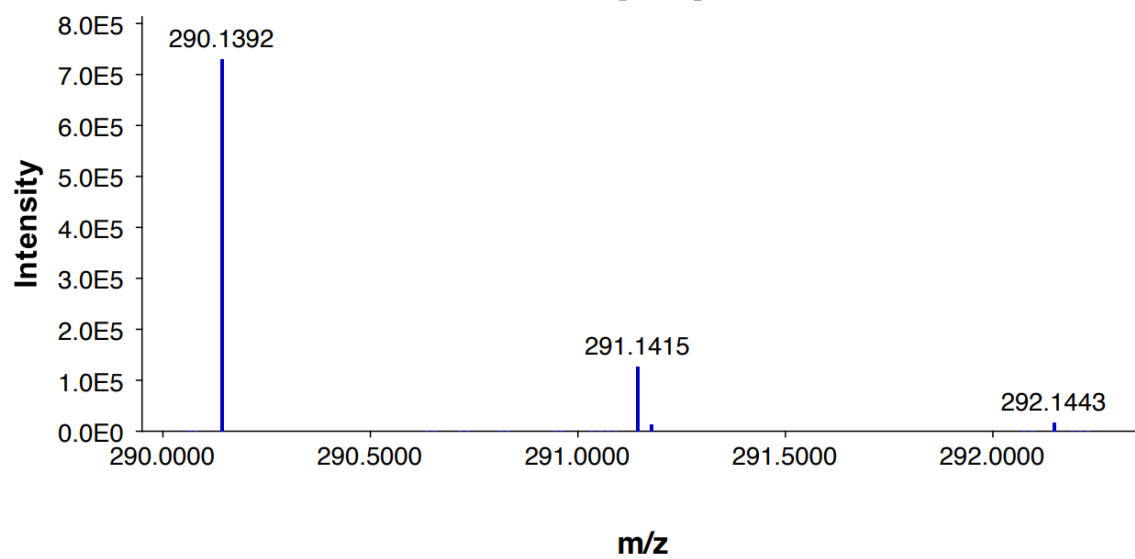

HRMS spectrum of 41

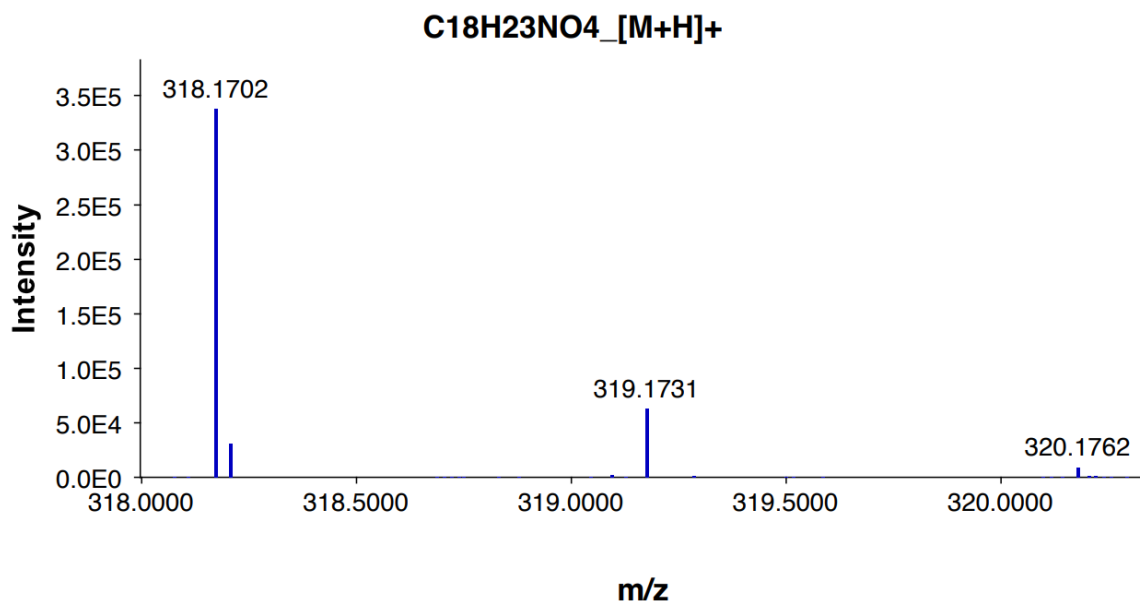

HRMS spectrum of 43

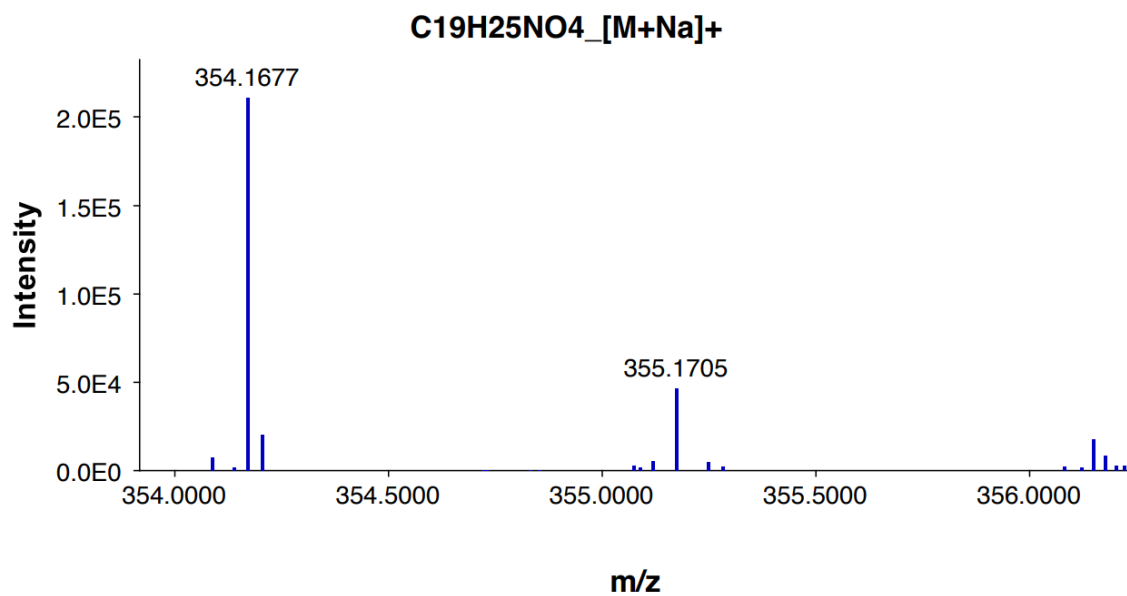

HRMS spectrum of 44
